# Supplementary material for: Construction of C–X (X = N, O) bonds from benzyl alcohols via Cu-BTC-catalyzed oxidative coupling
Source: Royal Society of Chemistry journal article supplement (doi:10.1039/d4cy00618f), 2024-01-01
Supplement: d4cy00618f2.pdf [file d4cy00618f2.pdf]

## Supporting Information

# Construction of C-X (X=N, O) bonds from Benzyl Alcohols via Cu-BTC-Catalyzed Oxidative Coupling

Yujuan Wu,<sup>[a]</sup> Lianji Zhang,<sup>[a]</sup> Huimin Liu,<sup>[a]</sup> Yongfei Wang,<sup>\*[a, b]</sup> Cuiping Wang,<sup>[a]</sup> Zhizhi

Hu,<sup>[a]</sup> and Zhiqiang Zhang<sup>\*[a]</sup>

<sup>a</sup>School of Chemical Engineering, University of Science and Technology Liaoning 185 Qianshan Zhong Road, Anshan 114051, P. R. China

<sup>b</sup>School of Materials and Metallurgy, University of Science and Technology Liaoning Anshan, Liaoning 114051, P. R. China

E-mail: [wyf8307@ustl.edu.cn](mailto:wyf8307@ustl.edu.cn), [zzq@ustl.edu.cn](mailto:zzq@ustl.edu.cn)

## 1. Experimental procedures

### 1.1 Materials

All chemicals were of reagent grade quality. They were purchased from commercial sources and used as received.

**Synthesis of Cu-BTC:** Weigh 3.0 g of 1,3,5- homobenzenetric acid was dissolved in 30 mL of N, N-dimethylformamide and 60 mL of anhydrous ethanol, weigh 6.0 g of Cu (NO<sub>3</sub>)<sub>2</sub>·3H<sub>2</sub>O was dissolved in 60 mL of deionized water, and the two solutions were mixed and stirred until clarified. The mixture was transferred to a PTFE-lined stainless steel reactor, and the reaction was crystallized at 85 °C. After 20 h of constant temperature reaction, it was removed, left to stand, naturally cooled to room temperature, centrifuged and washed several times, and the blue crystals obtained after drying were Cu-BTC<sup>1</sup>.

**Synthesis of Cu-BDC:** Similar to the synthesis of Cu-BTC, only

1,3,5-homobenzenetricarboxylic acid needs to be replaced with 1,2-benzenedicarboxylic acid <sup>2</sup>.

**Synthesis of Cu-BTeC:** Similar to the synthesis of Cu-BTC, only 1,3,5-homobenzenetricarboxylic acid was exchanged for 1,2,4,5-homobenzenetetraacetic acid <sup>3</sup>.

**Synthesis of copper benzoate:** Weigh the molar ratio of 1:3 copper oxide and benzoic acid (in order to make the reaction of copper oxide complete, benzoic acid should be excessive), the copper oxide and benzoic acid were placed in a mortar and grind, and then loaded into a three-necked flask, add a small amount of distilled water into a paste, three-necked flasks on the mouth of a condensate tube, a mouth of the installation of an electric stirrer, the other mouth with a grinding mouth plug tightly put into a constant-temperature bath, control the temperature in the 95~97°C, open the stirrer, after 6~8h of reaction will be transferred to a small beaker, add appropriate amount of acetone, heated to a slight boil, while hot, the filter cake was washed with anhydrous pressure extraction, and the product with a reduced pressure filtration. Stirrer, after 6~8h reaction, the product was transferred to a small beaker, add appropriate amount of acetone, heated to a slight boil, while hot, filtration under reduced pressure, the filter cake was washed with anhydrous ethanol, the product was put into the oven at 80 °C in the drying of 5 h to get light blue copper benzoate powder.

**Synthesis of Co-BTC, Zn-BTC, Ni-BTC, Fe-BTC, Mn-BTC:** These MOFs materials were synthesized in a similar way <sup>4</sup>, with the only difference being the

replacement of  $\text{Cu}(\text{NO}_3)_2 \cdot 3\text{H}_2\text{O}$  with  $\text{Co}(\text{NO}_3)_2 \cdot 6\text{H}_2\text{O}$ ,  $\text{Zn}(\text{NO}_3)_2 \cdot 6\text{H}_2\text{O}$ ,  $\text{Ni}(\text{NO}_3)_2 \cdot 6\text{H}_2\text{O}$ ,  $\text{Fe}(\text{NO}_3)_3 \cdot 9\text{H}_2\text{O}$ , and  $\text{Mn}(\text{NO}_3)_2 \cdot 4\text{H}_2\text{O}$ , respectively.

## **1.2 Methods**

### **Powder X-ray diffraction (PXRD) Analysis.**

Approximately 20 mg of crystalline sample was 50 °C dried before PXRD analysis. PXRD data were collected at ambient temperature on a Puxi DX-3 diffractometer at 40 kV, 40 mA for Cu K $\alpha$  ( $\lambda = 1.5418 \text{ \AA}$ ), with a scan speed of 2°/min, a step size of 0.02° in 2 $\theta$ , and a 2 $\theta$  range of 4-45°.

### **Scanning Electron Microscope (SEM) Analysis.**

Cu-BTC single crystals were imaged using an Olympus BX60 optical microscope equipped with a ProgRes C5 camera. Optical microscopic images were captured and analyzed with ProgRes® CapturePro 2.8.8 software. SEM images of Cu-BTC crystals were obtained with FEI Phenom® Bench-top SEM. Crystals were mounted on conductive carbon taps and sputter-coated with 5-10 nm of Au-Pd before imaging.

### **N<sub>2</sub> Sorption Analysis.**

BET surface area ( $\text{cm}^2/\text{g}$ ) were tested by autosorb iQ/AsiQwin analyzer (Quantachrome) at liquid nitrogen temperature (77K). Approximately 30-50 mg of activated samples were evacuated on a vacuum line overnight, then transferred to a pre-weighed sample tube and degassed at 100 °C for approximately 24 h or until the outgas rate was  $< 5 \mu\text{m Hg}$ .

### **<sup>1</sup>H and <sup>13</sup>C Nuclear Magnetic Resonance Spectroscopy (NMR).**

The obtained products (3a-3s, 4a-4q) was dissolved in  $\text{CDCl}_3$ ,  $\text{DMSO-}d_6$  or acetone- $d_6$  (according to their solubility). The  $^1\text{H-NMR}$ ,  $^{13}\text{C-NMR}$  and  $^{19}\text{F-NMR}$  spectra were recorded by Bruker Advance-III 400/500MHz NMR spectrometers.

### High-Resolution Mass Spectroscopy (HRMS).

The solution of obtained products (3a-3s, 4a-4q) in methanol were injected into Agilent 6540 Liquid Chromatography-Electrospray Ionisation Quadrupole-TOF mass spectrometer respectively to measure their high-resolution mass spectrum.

## 2. Supporting information

### 2.1 Catalyst characterization information

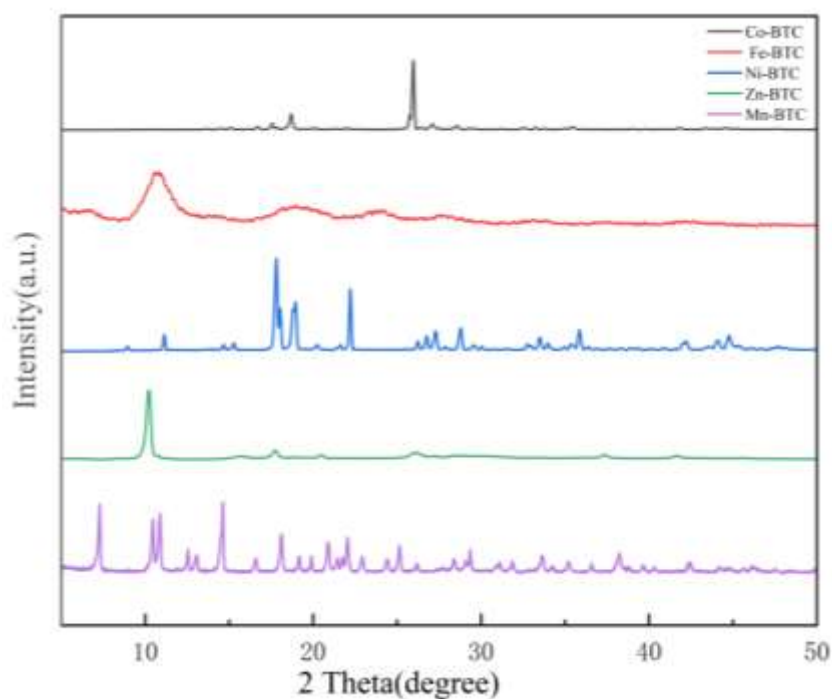

Figure S1. XRD spectra of different metals

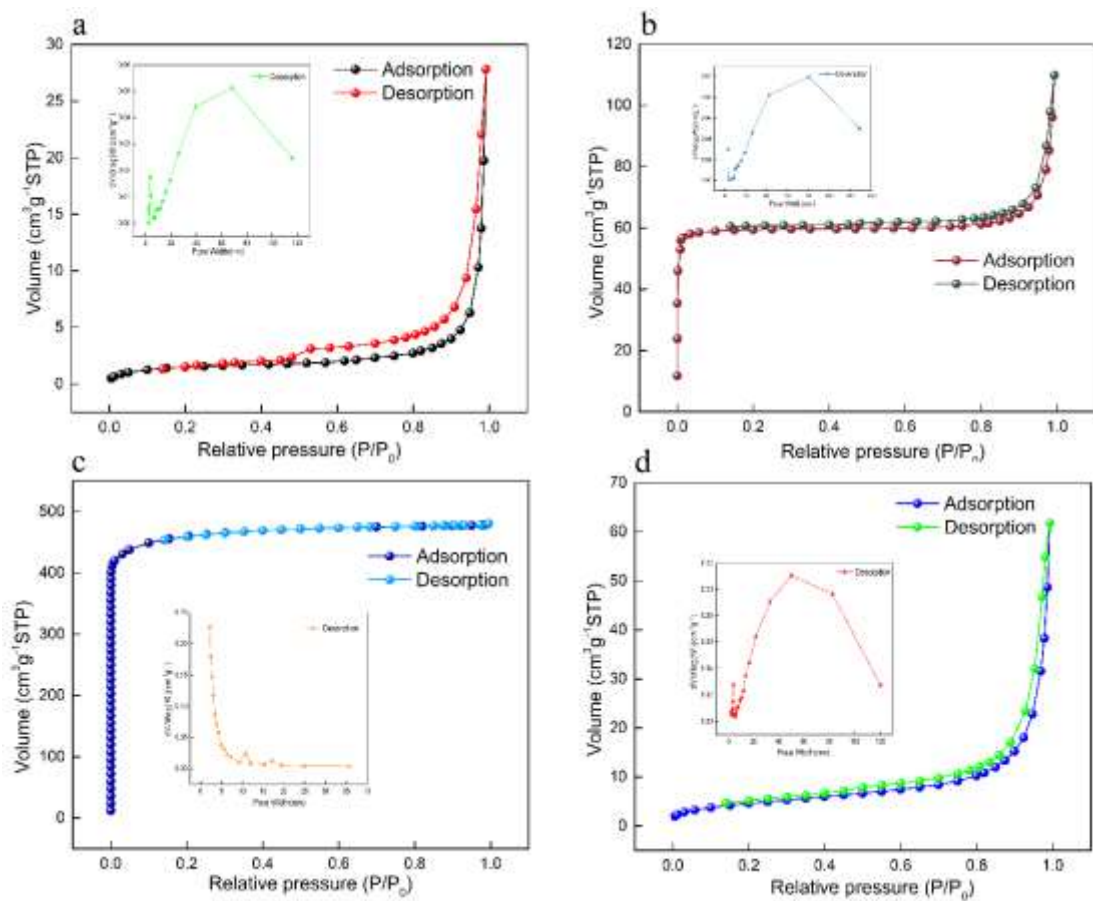

Figure S2. Surface area and porosity analysis of (a) Copper benzoate (b) Cu-BDC (c) Cu-BTC (d) Cu-BTeC

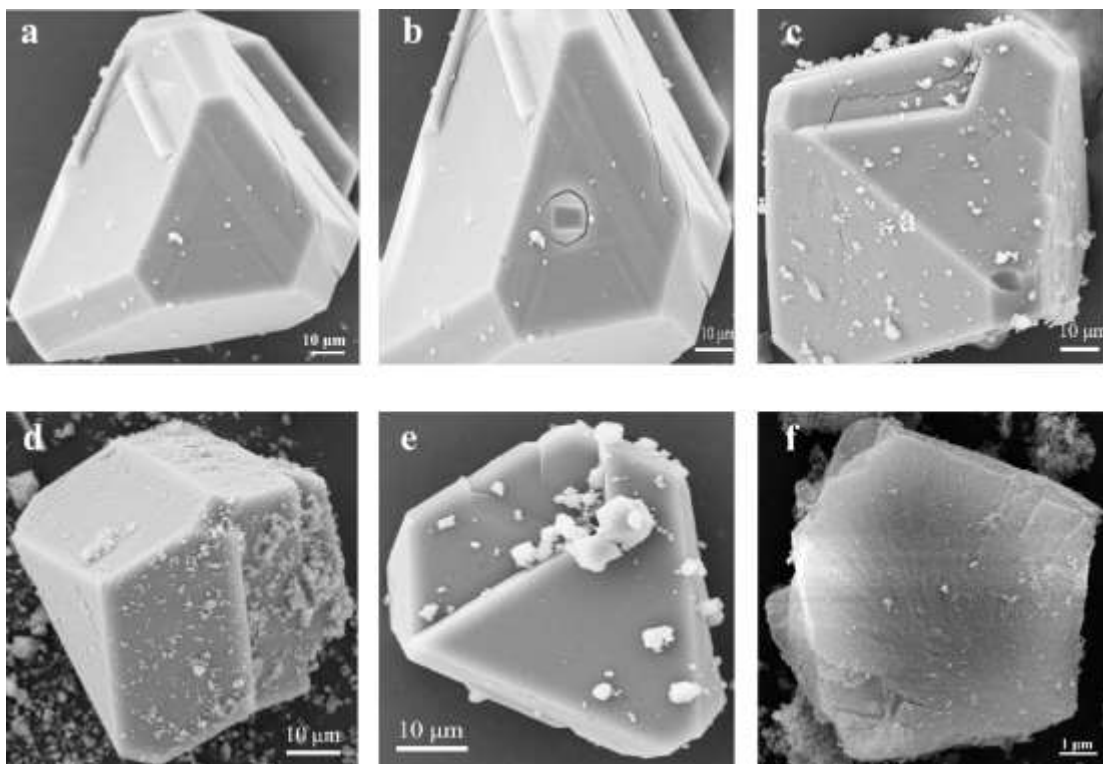

Figure S3. SEM images of catalysts after successive cycling experiments (a) fresh Cu-BTC (b) first cycle (c) second cycle (d) third cycle (e) fourth cycle (f) fifth cycle

## 2.2 Evaluation of catalyst performance

### NMR and GC/MS analysis

$^1\text{H}$  and  $^{13}\text{C}$  NMR spectra for quinazolinones of Table-2 were assigned and reproduced from the corresponding literature.  $^1\text{H}$  and  $^{13}\text{C}$  NMR spectra were recorded using at ambient temperature on JEOL-ECX 600 operating at 600.17 and 150.92 MHz, respectively with tetramethylsilane as an internal standard. All chemical shifts ( $\delta$ ) are reported in ppm and coupling constants ( $J$ ) in Hz. All chemical shifts are reported relative to tetramethylsilane and *d*-solvent peaks 77.00 ppm chloroform, 40.45 ppm dimethylsulfoxide, respectively. Abbreviations used in the NMR experiments: s, singlet; d, doublet; t, triplet; q, quartet; m, multiplet. LC-MS spectra was taken by AGILENT 1100.

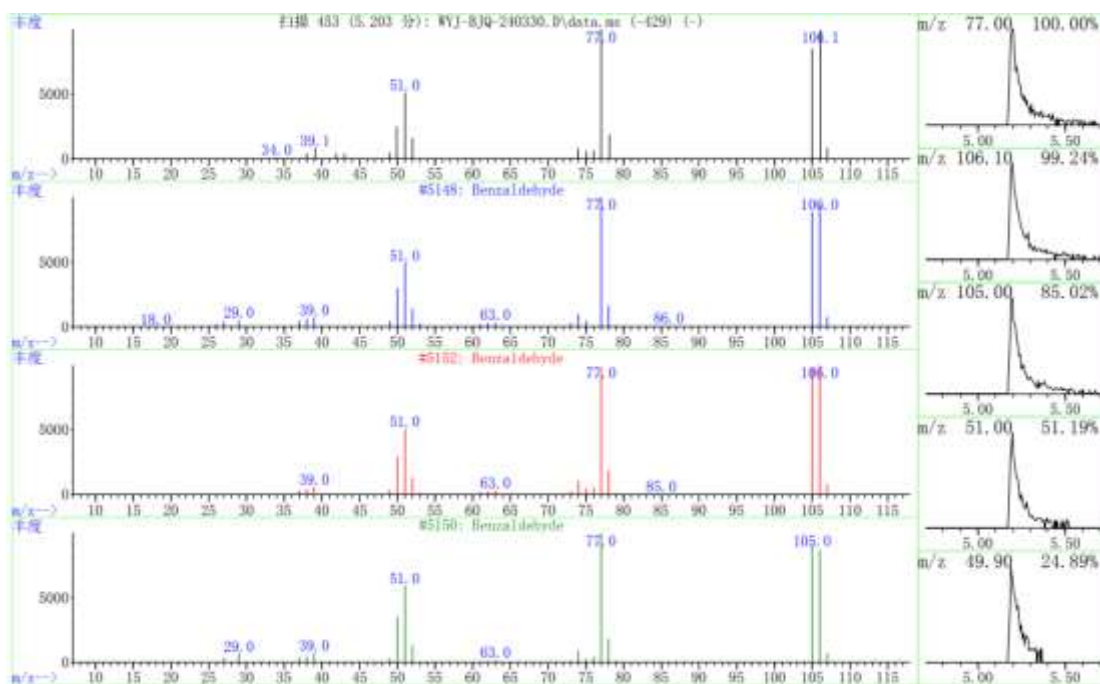

Figure S4. Oxidation of benzyl alcohol to benzaldehyde in other solvents

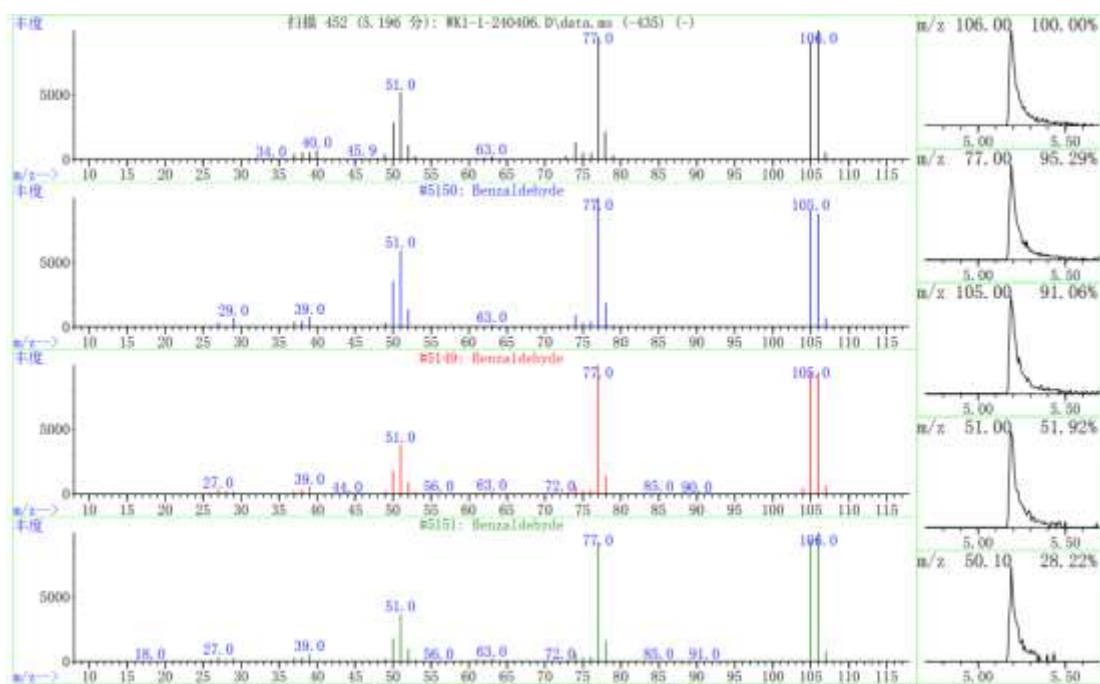

Figure S5. Oxidation of benzyl alcohol to benzaldehyde in the presence of

Cu-BTC

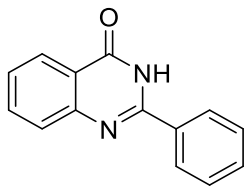

**2-Phenyl-3H-quinazolin-4-one(3a):**  $^1\text{H}$  NMR (400 MHz,  $\text{DMSO-}d_6$ )  $\delta$  12.54 (s, 1H), 8.17 (dd,  $J = 9.6, 7.4$  Hz, 3H), 7.84 (t,  $J = 7.6$  Hz, 1H), 7.75 (d,  $J = 8.1$  Hz, 1H), 7.62 – 7.49 (m, 4H);  $^{13}\text{C}$  NMR (101 MHz,  $\text{DMSO-}d_6$ )  $\delta$  162.74, 152.83, 135.08, 133.21, 131.87, 129.08, 128.24, 127.06, 126.33, 121.45; HRMS (APCI)  $m/z$ :  $[\text{M}+\text{H}]^+$ : exact mass: 223.0793; obtained mass: 223.0790.

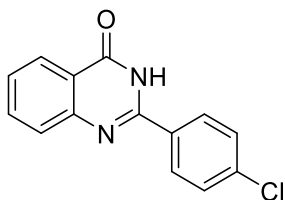

**2-(4-Chloro-phenyl)-3H-quinazolin-4-one(3b):**  $^1\text{H}$  NMR (400 MHz,  $\text{DMSO-}d_6$ )  $\delta$  12.60 (s, 1H), 8.22 – 8.18 (m, 2H), 8.16 (dd,  $J = 7.9, 1.5$  Hz, 1H), 7.85 (ddd,  $J = 8.6, 7.1, 1.6$  Hz, 1H), 7.75 (d,  $J = 7.7$  Hz, 1H), 7.65 – 7.61 (m, 2H), 7.54 (ddd,  $J = 8.1, 7.1, 1.2$  Hz, 1H);  $^{13}\text{C}$  NMR (101 MHz,  $\text{DMSO-}d_6$ )  $\delta$  162.63, 151.84, 149.06, 136.78, 135.16, 132.04, 130.11, 129.17, 128.24, 128.01, 127.27, 126.35, 121.48; HRMS (APCI)  $m/z$ :  $[\text{M}+\text{H}]^+$ : exact mass: 257.0403; obtained mass: 257.0403.

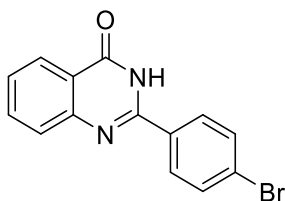

**2-(4-bromophenyl)quinazolin-4(3H)-one (3c):**  $^1\text{H}$  NMR (400 MHz,  $\text{DMSO-}d_6$ )  $\delta$  12.54 (s, 1H), 8.20 – 8.17 (m, 2H), 8.16 – 8.11 (m, 1H), 7.88 – 7.83 (m, 1H), 7.75 (d,  $J = 7.6$  Hz, 1H), 7.61 – 7.51 (m, 3H);  $^{13}\text{C}$  NMR (101 MHz,  $\text{DMSO-}d_6$ )  $\delta$  162.70,



152.79, 149.22, 135.17, 135.10, 133.20, 132.41, 132.10, 131.87, 130.29, 129.09, 128.24, 127.99, 127.08, 126.36, 126.33, 125.71, 121.47; HRMS (APCI)  $m/z$ :  $[M+H]^+$ : exact mass: 300.9898; obtained mass: 300.9899.

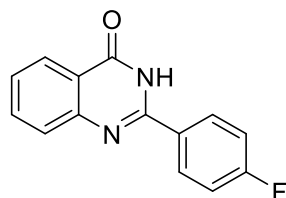

**2-(4-Fluoro-phenyl)-3H-quinazolin-4-one(3d):**  $^1\text{H}$  NMR (400 MHz, Chloroform-*d*)  $\delta$  10.75 (s, 1H), 8.32 (dt,  $J = 7.9, 1.2$  Hz, 1H), 8.22 – 8.18 (m, 2H), 7.83 – 7.80 (m, 2H), 7.52 (ddd,  $J = 8.1, 4.4, 3.5$  Hz, 1H), 7.31 – 7.26 (m, 2H);  $^{13}\text{C}$  NMR (101 MHz, Chloroform-*d*)  $\delta$  162.19, 149.44, 148.27, 134.03, 128.47, 128.38, 127.95, 126.95, 125.97, 125.42, 119.75, 115.43, 115.21; HRMS (APCI)  $m/z$ :  $[M+H]^+$ : exact mass: 241.0699; obtained mass: 241.0699.

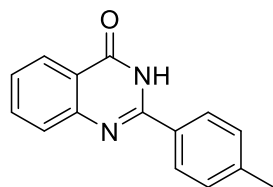

**2-*p*-Tolyl-3H-quinazolin-4-one(3e):**  $^1\text{H}$  NMR (400 MHz, Chloroform-*d*)  $\delta$  10.38 (s, 1H), 8.33 – 8.30 (m, 1H), 8.03 (d,  $J = 8.3$  Hz, 2H), 7.83 – 7.77 (m, 2H), 7.49 (ddd,  $J = 8.2, 6.4, 1.9$  Hz, 1H), 7.38 (d,  $J = 7.7$  Hz, 2H), 2.46 (s, 3H);  $^{13}\text{C}$  NMR (101 MHz, Chloroform-*d*)  $\delta$  162.00, 150.40, 148.49, 141.32, 133.84, 128.93, 128.89, 128.18, 126.91, 125.91, 125.67, 125.42, 119.88, 20.51; HRMS (APCI)  $m/z$ :  $[M+H]^+$ : exact mass: 237.09503; obtained mass: 237.0951.

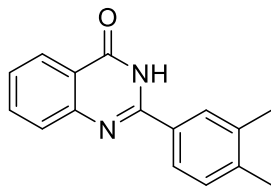

**2-(3,4-dimethylphenyl)quinazolin-4(3H)-one(3f):**  $^1\text{H}$  NMR (400 MHz, Chloroform-*d*)  $\delta$  10.09 (s, 1H), 8.32 (d,  $J = 7.9$  Hz, 1H), 7.91 (s, 1H), 7.84 – 7.77 (m, 3H), 7.49 (ddd,  $J = 8.1, 6.6, 1.7$  Hz, 1H), 7.32 (d,  $J = 7.9$  Hz, 1H), 2.40 (s, 3H), 2.37 (s, 3H);  $^{13}\text{C}$  NMR (101 MHz, Chloroform-*d*)  $\delta$  161.79, 150.48, 148.50, 140.08, 136.73, 133.81, 129.43, 129.20, 127.05, 126.90, 125.62, 125.41, 123.20, 18.89, 18.86; HRMS (APCI)  $m/z$ :  $[\text{M}+\text{H}]^+$ : exact mass: 251.1106; obtained mass: 251.1107.

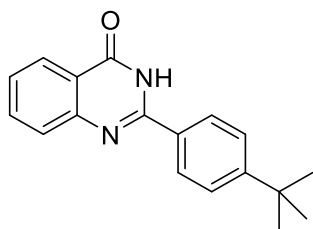

**2-(4-(tert-butyl)phenyl)quinazolin-4(3H)-one(3g):**  $^1\text{H}$  NMR (400 MHz, DMSO-*d*<sub>6</sub>)  $\delta$  12.47 (s, 1H), 8.17 – 8.12 (m, 3H), 7.83 (ddd,  $J = 8.5, 7.1, 1.6$  Hz, 1H), 7.73 (d,  $J = 8.1$  Hz, 1H), 7.58 – 7.48 (m, 3H), 1.33 (s, 9H);  $^{13}\text{C}$  NMR (101 MHz, DMSO-*d*<sub>6</sub>)  $\delta$  154.80, 152.69, 149.30, 135.04, 132.05, 130.42, 129.13, 128.04, 126.88, 126.32, 125.90, 121.39, 35.16, 31.39; HRMS (APCI)  $m/z$ :  $[\text{M}+\text{H}]^+$ : exact mass: 278.1419; obtained mass: 278.1420.

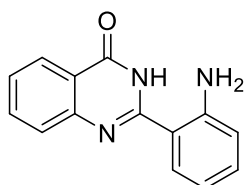

**2-(2-aminophenyl)quinazolin-4(3H)-one(3h):**  $^1\text{H}$  NMR (400 MHz, Chloroform-*d*)  $\delta$  9.87 (s, 1H), 8.30 (dd,  $J = 8.3, 1.1$  Hz, 1H), 7.79 – 7.70 (m, 3H), 7.58 (dd,  $J = 8.1,$

1.4 Hz, 1H), 7.48 (ddd,  $J = 8.1, 7.0, 1.3$  Hz, 1H), 7.31 – 7.27 (m, 1H), 6.84 – 6.79 (m, 2H), 6.25 (s, 2H);  $^{13}\text{C}$  NMR (101 MHz, Chloroform- $d$ )  $\delta$  162.45, 152.15, 148.63, 148.52, 134.83, 132.55, 127.19, 126.87, 126.69, 126.51, 120.59, 117.79, 117.39, 113.21; HRMS (APCI)  $m/z$ :  $[\text{M}+\text{H}]^+$ : exact mass: 238.0902; obtained mass: 238.0902.

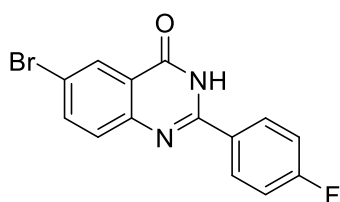

**6-bromo-2-(4-fluorophenyl)quinazolin-4(3H)-one(3i):**  $^1\text{H}$  NMR (400 MHz, DMSO- $d_6$ )  $\delta$  12.56 (s, 1H), 8.26 (dd,  $J = 8.9, 5.4$  Hz, 2H), 8.15 (dd,  $J = 8.0, 1.5$  Hz, 1H), 7.84 (ddd,  $J = 8.5, 7.1, 1.6$  Hz, 1H), 7.74 (d,  $J = 7.7$  Hz, 1H), 7.55 – 7.49 (m, 1H), 7.38 (d,  $J = 8.9$  Hz, 1H);  $^{13}\text{C}$  NMR (101 MHz, DMSO- $d_6$ )  $\delta$  165.76, 163.28, 151.98, 149.11, 135.09, 130.85 (d,  $J = 9.0$  Hz), 129.78, 127.86, 127.06, 126.33, 121.36, 116.21, 115.99; HRMS (APCI)  $m/z$ :  $[\text{M}+\text{H}]^+$ : exact mass: 318.9804; obtained mass: 318.9804.

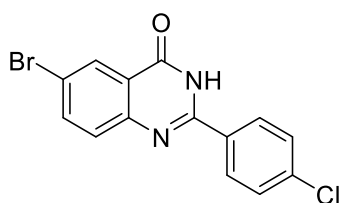

**6-bromo-2-(4-chlorophenyl)quinazolin-4(3H)-one (3j):**  $^1\text{H}$  NMR (400 MHz, DMSO- $d_6$ )  $\delta$  12.58 (s, 1H), 8.20 (d,  $J = 8.7$  Hz, 2H), 8.16 (dd,  $J = 8.0, 1.5$  Hz, 1H), 7.87 – 7.82 (m, 1H), 7.74 (d,  $J = 8.3$  Hz, 1H), 7.63 (d,  $J = 8.6$  Hz, 1H), 7.56 – 7.51 (m, 1H);  $^{13}\text{C}$  NMR (101 MHz, DMSO- $d_6$ )  $\delta$  136.75, 135.12, 132.13, 130.11, 129.16, 127.23, 126.35, 121.47; HRMS (APCI)  $m/z$ :  $[\text{M}+\text{H}]^+$ : exact mass: 334.9509; obtained

mass: 334.9504.

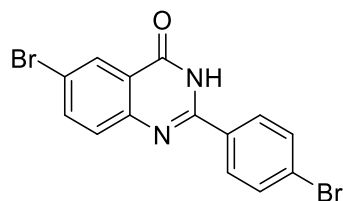

**6-bromo-2-(4-bromophenyl)quinazolin-4(3H)-one(3k):**  $^1\text{H}$  NMR (400 MHz, DMSO- $d_6$ )  $\delta$  12.70 (s, 1H), 8.23 (d,  $J = 2.4$  Hz, 1H), 8.19 – 8.15 (m, 2H), 7.98 (dd,  $J = 8.7, 2.4$  Hz, 1H), 7.70 (d,  $J = 8.7$  Hz, 1H), 7.60 – 7.53 (m, 2H);  $^{13}\text{C}$  NMR (101 MHz, DMSO- $d_6$ )  $\delta$  137.87, 133.03, 132.08, 129.12, 128.48, 128.33, 119.36; HRMS (APCI)  $m/z$ :  $[\text{M}+\text{H}]^+$ : exact mass: 380.8983; obtained mass: 380.8985.

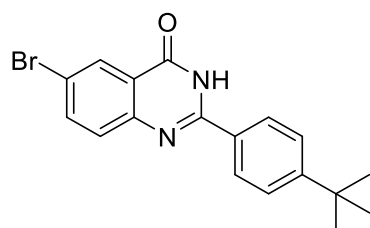

**6-bromo-2-(4-(tert-butyl)phenyl)quinazolin-4(3H)-one(3l):**  $^1\text{H}$  NMR (400 MHz, DMSO- $d_6$ )  $\delta$  12.46 (s, 1H), 8.13 (d,  $J = 8.5$  Hz, 2H), 7.83 (ddd,  $J = 8.5, 7.1, 1.6$  Hz, 1H), 7.73 (d,  $J = 8.1$  Hz, 1H), 7.57 (d,  $J = 8.6$  Hz, 2H), 7.53 – 7.49 (m, 1H), 1.33 (s, 9H);  $^{13}\text{C}$  NMR (101 MHz, DMSO- $d_6$ )  $\delta$  162.77, 154.81, 152.70, 135.05, 130.43, 128.04, 127.90, 126.89, 126.32, 125.91, 121.39, 35.16, 31.39; HRMS (APCI)  $m/z$ :  $[\text{M}+\text{H}]^+$ : exact mass: 357.0524; obtained mass: 357.0524.

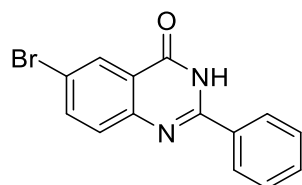

**6-bromo-2-phenylquinazolin-4(3H)-one(3m):**  $^1\text{H}$  NMR (400 MHz, DMSO- $d_6$ )  $\delta$  12.53 (s, 1H), 8.20 – 8.14 (m, 3H), 7.84 (ddd,  $J = 8.6, 7.1, 1.6$  Hz, 1H), 7.75 (d,  $J =$

8.1 Hz, 1H), 7.58 – 7.52 (m, 3H);  $^{13}\text{C}$  NMR (101 MHz, DMSO- $d_6$ )  $\delta$  135.06, 131.85, 129.08, 128.24, 127.04, 126.33; HRMS (APCI)  $m/z$ :  $[\text{M}+\text{H}]^+$ : exact mass: 300.9899 obtained mass: 300.9898.

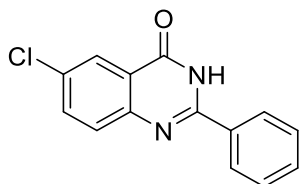

**6-chloro-2-phenylquinazolin-4(3H)-one(3n):**  $^1\text{H}$  NMR (400 MHz, DMSO- $d_6$ )  $\delta$  12.70 (s, 1H), 8.18 (d,  $J = 7.5$  Hz, 2H), 8.09 (d,  $J = 2.5$  Hz, 1H), 7.86 (dd,  $J = 8.7, 2.6$  Hz, 1H), 7.77 (d,  $J = 8.7$  Hz, 1H), 7.57 (dt,  $J = 14.3, 6.9$  Hz, 3H);  $^{13}\text{C}$  NMR (101 MHz, DMSO- $d_6$ )  $\delta$  161.86, 153.40, 147.93, 135.16, 132.97, 132.07, 131.22, 130.15, 129.11, 128.33, 125.36, 122.71; HRMS (APCI)  $m/z$ :  $[\text{M}+\text{H}]^+$ : exact mass: 257.0403 obtained mass: 257.0403.

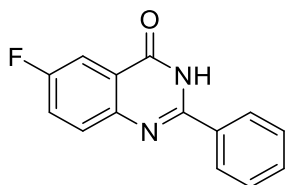

**6-fluoro-2-phenylquinazolin-4(3H)-one(3o):**  $^1\text{H}$  NMR (400 MHz, DMSO- $d_6$ )  $\delta$  12.65 (s, 1H), 8.17 (d,  $J = 7.3$  Hz, 2H), 7.85 – 7.80 (m, 2H), 7.73 (td,  $J = 8.7, 3.0$  Hz, 1H), 7.62 – 7.53 (m, 3H);  $^{13}\text{C}$  NMR (101 MHz, DMSO- $d_6$ )  $\delta$  162.24, 161.68, 159.25, 152.45, 133.10, 131.89, 129.09, 128.23, 123.65, 123.41, 122.72, 122.64, 111.11, 110.87; HRMS (APCI)  $m/z$ :  $[\text{M}+\text{H}]^+$ : exact mass: 241.0699 obtained mass: 241.0699.

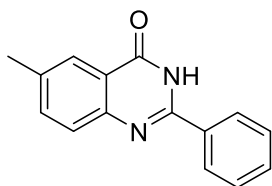

**6-methyl-2-phenylquinazolin-4(3H)-one(3p):**  $^1\text{H}$  NMR (400 MHz, DMSO- $d_6$ )  $\delta$

12.47 (s, 1H), 8.20 (dd,  $J = 8.1, 1.6$  Hz, 2H), 7.99 (s, 1H), 7.70 (d,  $J = 2.0$  Hz, 2H), 7.64 – 7.55 (m, 3H), 2.50 (s, 3H);  $^{13}\text{C}$  NMR (101 MHz,  $\text{DMSO-}d_6$ )  $\delta$  170.82, 162.64, 151.97, 136.79, 136.36, 133.26, 131.71, 129.06, 128.11, 127.85, 125.71, 121.19, 21.22; HRMS (APCI)  $m/z$ :  $[\text{M}+\text{H}]^+$ : exact mass: 237.0950 obtained mass: 237.0951.

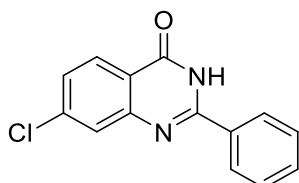

**7-chloro-2-phenylquinazolin-4(3H)-one(3q):**  $^1\text{H}$  NMR (400 MHz,  $\text{DMSO-}d_6$ )  $\delta$  12.66 (s, 1H), 8.20 – 8.13 (m, 3H), 7.80 (d,  $J = 2.0$  Hz, 1H), 7.62 – 7.54 (m, 4H);  $^{13}\text{C}$  NMR (101 MHz,  $\text{DMSO-}d_6$ )  $\delta$  162.19, 139.64, 132.90, 132.19, 129.12, 128.44, 128.40, 127.27, 120.31; HRMS (APCI)  $m/z$ :  $[\text{M}+\text{H}]^+$ : exact mass: 257.0403 obtained mass: 257.0405.

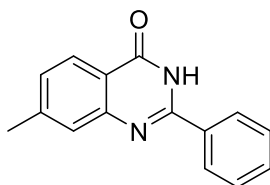

**7-methyl-2-phenylquinazolin-4(3H)-one(3r):**  $^1\text{H}$  NMR (400 MHz,  $\text{DMSO-}d_6$ )  $\delta$  12.45 (s, 1H), 8.21 – 8.17 (m, 2H), 8.06 (d,  $J = 8.0$  Hz, 1H), 7.62 – 7.56 (m, 4H), 7.37 (dd,  $J = 8.2, 1.7$  Hz, 1H), 2.50 (s, 3H);  $^{13}\text{C}$  NMR (101 MHz,  $\text{DMSO-}d_6$ )  $\delta$  162.64, 152.86, 145.55, 133.28, 131.81, 129.07, 128.50, 128.18, 126.20, 119.06, 21.84; HRMS (APCI)  $m/z$ :  $[\text{M}+\text{H}]^+$ : exact mass: 237.0950 obtained mass: 237.0952.

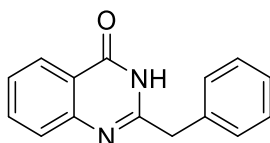

**Glycosminine (3s):**  $^1\text{H}$  NMR (400 MHz, Chloroform-*d*)  $\delta$  10.67 (s, 1H), 8.33 (d,  $J = 8.1$  Hz, 1H), 8.17 (d,  $J = 3.9$  Hz, 2H), 7.86 – 7.79 (m, 2H), 7.60 (s, 2H), 7.52 (d,  $J = 8.0$  Hz, 1H), 7.26 (d,  $J = 1.3$  Hz, 1H), 4.16 – 4.08 (m, 2H);  $^{13}\text{C}$  NMR (101 MHz, Chloroform-*d*)  $\delta$  150.48, 133.93, 131.70, 130.77, 128.17, 126.98, 126.12, 125.91, 125.43, 119.91, 40.33;  $[\text{M}+\text{H}]^+$ : exact mass: 236.0950 obtained mass: 236.0951.

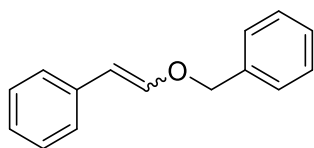

**(2-(benzyloxy)vinyl)benzene(4a, E/Z=98/2):**  $^1\text{H}$  NMR (400 MHz, DMSO-*d*<sub>6</sub>)  $\delta$  7.40 (d,  $J = 6.8$  Hz, 4H), 7.38 – 7.34 (m, 1H), 7.28 (dd,  $J = 13.0, 5.5$  Hz, 4H), 7.23 (d,  $J = 8.0$  Hz, 1H), 7.10 (t,  $J = 7.0$  Hz, 1H), 5.95 (d,  $J = 12.9$  Hz, 1H), 4.94 (s, 2H);  $^{13}\text{C}$  NMR (101 MHz, DMSO-*d*<sub>6</sub>)  $\delta$  148.83, 137.53, 136.65, 129.00, 128.91, 128.40, 128.24, 125.92, 125.32, 106.77, 71.83;  $[\text{M}+\text{H}]^+$ : exact mass: 210.1045 obtained mass: 210.1040.

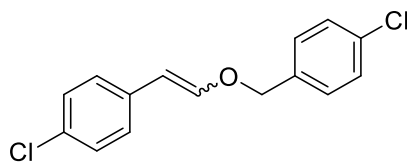

**1-chloro-4-(2-((4-chlorobenzyl)oxy)vinyl)benzene(4b, E/Z=79/21):**  $^1\text{H}$  NMR (400 MHz, Chloroform-*d*)  $\delta$  7.22 (d,  $J = 8.6$  Hz, 2H), 7.17 (d,  $J = 8.5$  Hz, 2H), 7.09 (s, 2H), 7.00 (d,  $J = 8.5$  Hz, 2H), 6.88 (d,  $J = 12.9$  Hz, 1H), 5.76 (d,  $J = 12.9$  Hz, 1H), 4.81 (s, 1H), 4.72 (s, 2H);  $^{13}\text{C}$  NMR (101 MHz, Chloroform-*d*)  $\delta$  146.79, 145.30, 134.02, 133.54, 133.00, 130.32, 128.51, 127.84, 127.80, 127.70, 127.61, 127.31, 125.32, 105.16, 73.24, 70.14;  $[\text{M}+\text{H}]^+$ : exact mass: 278.0265 obtained mass: 278.0265.

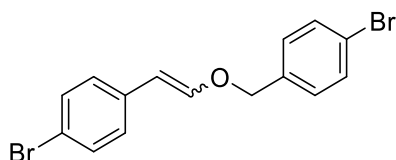

**1-bromo-4-(2-((4-bromobenzyl)oxy)vinyl)benzene (4c, E/Z=94/6):**  $^1\text{H}$  NMR (400 MHz, Chloroform-*d*)  $\delta$  7.44 (d,  $J = 8.5$  Hz, 2H), 7.30 (d,  $J = 8.5$  Hz, 1H), 7.18 (d,  $J = 6.0$  Hz, 4H), 7.01 (d,  $J = 8.5$  Hz, 1H), 6.98 – 6.94 (m, 1H), 5.80 (d,  $J = 12.9$  Hz, 1H), 4.77 (s, 2H);  $^{13}\text{C}$  NMR (101 MHz, Chloroform-*d*)  $\delta$  146.84, 134.00, 130.63, 128.13, 127.60, 125.68, 121.12, 121.01, 105.21, 70.17;  $[\text{M}+\text{H}]^+$ : exact mass: 367.9234 obtained mass: 367.9235.

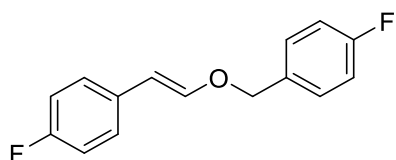

**(E)-1-fluoro-4-(2-((4-fluorobenzyl)oxy)vinyl)benzene (4d):**  $^1\text{H}$  NMR (400 MHz, Chloroform-*d*)  $\delta$  7.17 (dd,  $J = 8.5, 5.6$  Hz, 4H), 6.90 (t,  $J = 8.7$  Hz, 5H), 4.48 (s, 4H);  $^{13}\text{C}$  NMR (101 MHz, Chloroform-*d*)  $\delta$  162.47, 160.03, 135.60, 135.57, 127.75, 127.66, 114.40, 114.19, 63.43;  $[\text{M}+\text{H}]^+$ : exact mass: 246.0856 obtained mass: 246.0855.

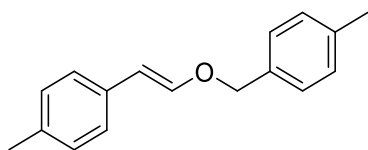

**(E)-1-methyl-4-(2-((4-methylbenzyl)oxy)vinyl)benzene (4e):**  $^1\text{H}$  NMR (400 MHz, Chloroform-*d*)  $\delta$  7.29 – 7.24 (m, 3H), 7.17 (d,  $J = 7.9$  Hz, 2H), 7.11 (d,  $J = 8.1$  Hz, 2H), 7.06 (s, 1H), 7.03 (d,  $J = 4.9$  Hz, 1H), 5.92 (d,  $J = 12.9$  Hz, 1H), 4.83 (s, 2H), 2.35 (s, 3H), 2.29 (s, 3H);  $^{13}\text{C}$  NMR (101 MHz, Chloroform-*d*)  $\delta$  146.08, 136.84,



134.31, 128.24, 126.73, 124.03, 105.68, 70.81, 20.02;  $[M+H]^+$ : exact mass: 238.1358  
obtained mass: 238.1357.

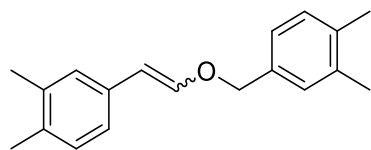

**4-(2-((3,4-dimethylbenzyl)oxy)vinyl)-1,2-dimethylbenzene (4f, E/Z=94/6):**  $^1\text{H}$   
NMR (400 MHz, Chloroform-*d*)  $\delta$  7.17 – 7.09 (m, 3H), 7.02 (dd,  $J = 10.4, 2.5$  Hz,  
3H), 6.97 (d,  $J = 7.7$  Hz, 1H), 5.91 (d,  $J = 12.9$  Hz, 1H), 4.81 (s, 2H), 2.27 (d,  $J = 4.7$   
Hz, 6H), 2.22 (d,  $J = 4.1$  Hz, 6H);  $^{13}\text{C}$  NMR (101 MHz, Chloroform-*d*)  $\delta$  146.04,  
135.81, 133.19, 128.81, 128.77, 128.11, 125.50, 124.27, 121.54, 105.65, 70.89, 18.76,  
18.73, 18.49, 18.32;  $[M+H]^+$ : exact mass: 266.2671 obtained mass: 266.1670.

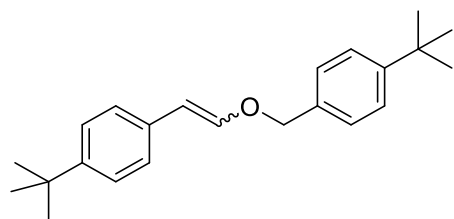

**1-(tert-butyl)-4-(2-((4-(tert-butyl)benzyl)oxy)vinyl)benzene (4g, E/Z=94/6):**  $^1\text{H}$   
NMR (400 MHz, Chloroform-*d*)  $\delta$  7.41 (d,  $J = 1.8$  Hz, 1H), 7.40 (s, 1H), 7.33 (s, 1H),  
7.32 – 7.29 (m, 2H), 7.28 (s, 1H), 7.18 – 7.16 (m, 2H), 7.05 (d,  $J = 12.9$  Hz, 1H), 5.95  
(d,  $J = 12.9$  Hz, 1H), 4.86 (s, 2H), 1.33 (s, 18H);  $^{13}\text{C}$  NMR (101 MHz, Chloroform-*d*)  
 $\delta$  151.15, 147.36, 133.80, 133.43, 129.33, 127.55, 126.93, 125.98, 125.54, 125.51,  
124.88, 106.53, 71.76, 34.61, 34.41, 31.37, 31.34, 31.32;  $[M+H]^+$ : exact mass:  
322.2297 obtained mass: 322.2298.

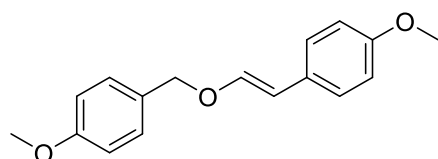

**(E)-1-methoxy-4-(2-((4-methoxybenzyl)oxy)vinyl)benzene (4h):**  $^1\text{H}$  NMR (400 MHz, Chloroform-*d*)  $\delta$  7.23 (d,  $J = 8.8$  Hz, 4H), 6.84 (d,  $J = 8.7$  Hz, 4H), 4.54 (s, 4H), 3.76 (s, 6H);  $^{13}\text{C}$  NMR (101 MHz, Chloroform-*d*)  $\delta$  158.11, 132.15, 127.60, 112.89, 63.85, 63.84, 54.25;  $[\text{M}+\text{H}]^+$ : exact mass: 270.1256 obtained mass: 270.1256.

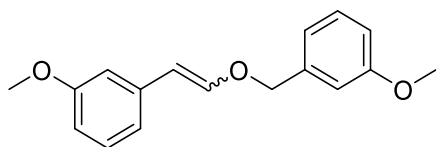

**1-methoxy-3-(2-((3-methoxybenzyl)oxy)vinyl)benzene (4i, E/Z=94/6):**  $^1\text{H}$  NMR (400 MHz, Chloroform-*d*)  $\delta$  7.30 (t,  $J = 7.9$  Hz, 1H), 7.18 (t,  $J = 7.9$  Hz, 1H), 7.08 (d,  $J = 12.9$  Hz, 1H), 6.99 – 6.93 (m, 2H), 6.90 – 6.81 (m, 2H), 6.77 (t,  $J = 2.1$  Hz, 1H), 6.70 (dd,  $J = 8.2, 2.6$  Hz, 1H), 5.94 (d,  $J = 12.8$  Hz, 1H), 4.88 (s, 2H), 3.83 (s, 3H), 3.80 (s, 3H);  $^{13}\text{C}$  NMR (101 MHz, Chloroform-*d*)  $\delta$  158.84, 158.82, 146.91, 137.24, 136.68, 128.63, 128.52, 118.72, 116.77, 112.71, 111.91, 110.19, 109.83, 105.85, 70.77, 54.24, 54.22, 54.15;  $[\text{M}+\text{H}]^+$ : exact mass: 270.1256 obtained mass: 270.1255.

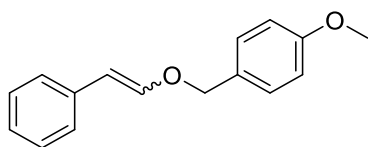

**1-methoxy-4-((styryloxy)methyl)benzene (4j, E/Z=96/4):**  $^1\text{H}$  NMR (400 MHz, Chloroform-*d*)  $\delta$  7.33 – 7.29 (m, 3H), 7.28 – 7.23 (m, 2H), 7.16 (dd,  $J = 8.4, 6.1$  Hz, 3H), 7.10 – 6.97 (m, 2H), 6.88 – 6.72 (m, 1H), 5.94 – 5.83 (m, 1H), 5.04 (s, 2H), 2.03 (s, 3H);  $^{13}\text{C}$  NMR (101 MHz, Chloroform-*d*)  $\delta$  170.72, 147.51, 135.76, 129.20, 128.42, 128.40, 128.08, 127.43, 113.85, 106.73, 71.73, 66.14, 55.12;  $[\text{M}+\text{H}]^+$ : exact mass: 240.1150 obtained mass: 240.1151.

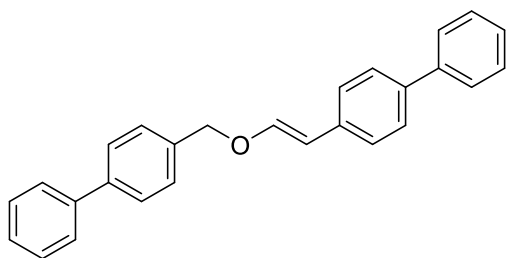

**(E)-4-(((2-([1,1'-biphenyl]-4-yl)vinyl)oxy)methyl)-1,1'-biphenyl (4k):**  $^1\text{H}$  NMR (400 MHz, Chloroform-*d*)  $\delta$  7.62 – 7.58 (m, 8H), 7.47 – 7.42 (m, 8H), 7.35 (t,  $J = 7.3$  Hz, 2H), 4.75 (s, 4H);  $^{13}\text{C}$  NMR (101 MHz, Chloroform-*d*)  $\delta$  140.85, 140.69, 139.89, 128.80, 127.48, 127.36, 127.34, 127.12, 65.15;  $[\text{M}+\text{H}]^+$ : exact mass: 362.1671 obtained mass: 362.1670.

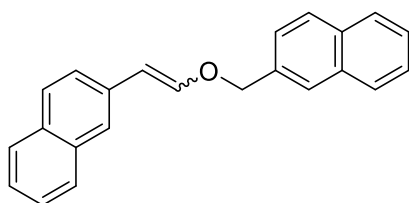

**2-(((2-(naphthalen-2-yl)vinyl)oxy)methyl)naphthalene (4l, E/Z=91/9):**  $^1\text{H}$  NMR (400 MHz, Chloroform-*d*)  $\delta$  7.93 – 7.81 (m, 4H), 7.74 (dd,  $J = 13.3, 8.1$  Hz, 3H), 7.59 (s, 1H), 7.54 – 7.48 (m, 3H), 7.45 – 7.33 (m, 3H), 7.28 (s, 1H), 6.18 (d,  $J = 12.8$  Hz, 1H), 5.12 (s, 2H);  $^{13}\text{C}$  NMR (101 MHz, Chloroform-*d*)  $\delta$  147.07, 133.17, 132.87, 132.68, 132.27, 131.04, 127.47, 127.13, 126.97, 126.74, 126.59, 126.41, 125.54, 125.30, 125.17, 125.15, 124.32, 124.01, 122.87, 122.26, 106.36, 71.22;  $[\text{M}+\text{H}]^+$ : exact mass: 310.1358 obtained mass: 310.1355.

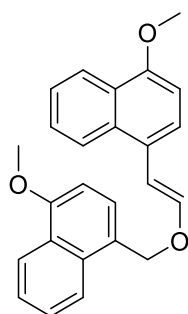

**(E)-1-methoxy-4-(2-((4-methoxynaphthalen-1-yl)methoxy)vinyl)naphthalene**

**(4m):**  $^1\text{H}$  NMR (400 MHz, Chloroform-*d*)  $\delta$  8.32 (d,  $J = 7.8$  Hz, 1H), 8.27 (d,  $J = 8.5$  Hz, 1H), 8.10 – 7.98 (m, 2H), 7.58 – 7.45 (m, 3H), 7.30 (d,  $J = 8.0$  Hz, 1H), 6.85 (d,  $J = 12.6$  Hz, 1H), 6.77 (dd,  $J = 18.0, 7.9$  Hz, 1H), 6.64 – 6.57 (m, 1H), 6.36 (d,  $J = 12.7$  Hz, 1H), 4.14 (s, 1H), 4.11 (d,  $J = 7.1$  Hz, 6H), 4.08 (s, 1H), 3.97 (d,  $J = 14.5$  Hz, 2H);  $^{13}\text{C}$  NMR (151 MHz, Chloroform-*d*)  $\delta$  170.14, 153.23, 152.64, 134.01, 132.85, 131.85, 127.06, 125.55, 125.38, 124.81, 123.97, 123.26, 122.84, 122.34, 121.58, 121.21, 106.06, 102.34, 59.38;  $[\text{M}+\text{H}]^+$ : exact mass: 370.1569 obtained mass: 370.1568.

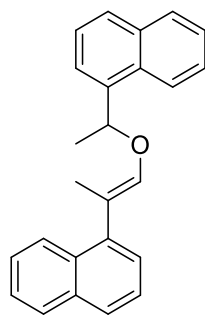

**(E)-1-(1-(1-(naphthalen-1-yl)ethoxy)prop-1-en-2-yl)naphthalene (4n):**  $^1\text{H}$  NMR (400 MHz, Chloroform-*d*)  $\delta$  8.73 (d,  $J = 8.6$  Hz, 2H), 7.99 (d,  $J = 8.2$  Hz, 2H), 7.94 (d,  $J = 7.2$  Hz, 2H), 7.87 (d,  $J = 8.0$  Hz, 2H), 7.60 (t,  $J = 7.0$  Hz, 2H), 7.52 (dd,  $J = 11.5, 7.0$  Hz, 4H), 5.11 (s, 1H), 4.06 (t,  $J = 6.9$  Hz, 1H), 2.75 (s, 6H);  $^{13}\text{C}$  NMR (151 MHz, Chloroform-*d*)  $\delta$  137.74, 134.60, 134.47, 132.97, 132.03, 130.08, 129.27, 129.13, 128.47, 128.21, 127.65, 127.39, 127.06, 125.43, 125.00, 123.31, 120.09, 66.75, 28.69, 13.11;  $[\text{M}+\text{H}]^+$ : exact mass: 338.1671 obtained mass: 338.1670.

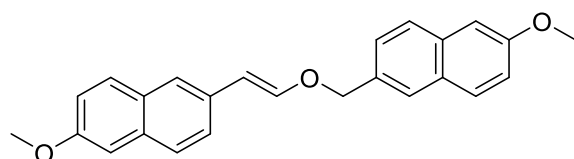

**(E)-2-methoxy-6-(2-((6-methoxynaphthalen-2-yl)methoxy)vinyl)naphthalene (4o):**

$^1\text{H}$  NMR (400 MHz, Chloroform-*d*)  $\delta$  7.86 (s, 1H), 7.74 – 7.61 (m, 5H), 7.57 (s, 2H), 7.47 (d,  $J = 8.6$  Hz, 1H), 7.13 – 7.11 (m, 1H), 7.09 (d,  $J = 3.4$  Hz, 2H), 6.86 (s, 1H), 6.56 – 6.42 (m, 2H), 6.23 (d,  $J = 10.8$  Hz, 1H), 3.91 (d,  $J = 2.7$  Hz, 6H);  $^{13}\text{C}$  NMR (151 MHz, Chloroform-*d*)  $\delta$  156.49, 132.55, 131.56, 128.31, 128.12, 126.11, 124.07, 123.97, 123.49, 122.65, 117.99, 104.85, 54.30;  $[\text{M}+\text{H}]^+$ : exact mass: 370.1569 obtained mass: 370.1568.

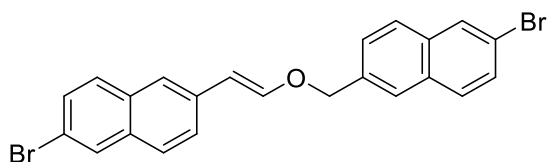

**(E)-2-bromo-6-(2-((6-bromonaphthalen-2-yl)methoxy)vinyl)naphthalene (4p):**

$^1\text{H}$  NMR (400 MHz, Chloroform-*d*)  $\delta$  8.11 – 7.99 (m, 1H), 7.94 (dd,  $J = 19.1, 6.3$  Hz, 1H), 7.86 – 7.68 (m, 4H), 7.67 – 7.52 (m, 3H), 7.51 – 7.31 (m, 3H), 5.13 (d,  $J = 36.3$  Hz, 1H), 4.11 (q,  $J = 7.2$  Hz, 2H), 3.73 (s, 1H);  $^{13}\text{C}$  NMR (151 MHz, Chloroform-*d*)  $\delta$  146.94, 128.82, 128.72, 128.66, 128.60, 128.53, 128.05, 127.17, 126.59, 126.56, 126.41, 126.26, 125.38, 125.30, 125.19, 125.16, 125.09, 123.28, 106.47, 70.90;  $[\text{M}+\text{H}]^+$ : exact mass: 467.9547 obtained mass: 467.9548.

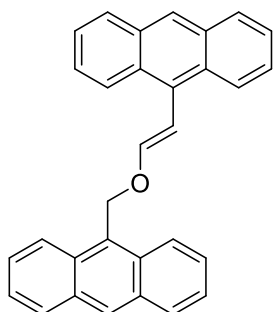

**(E)-9-(((2-(anthracen-9-yl)vinyl)oxy)methyl)anthracene (4q):**

$^1\text{H}$  NMR (400 MHz, Chloroform-*d*)  $\delta$  8.35 (s, 1H), 8.28 – 8.20 (m, 2H), 7.94 (d,  $J = 9.6$  Hz, 3H), 7.47 –

7.38 (m, 4H), 7.28 – 7.19 (m, 4H), 7.14 (d,  $J = 8.8$  Hz, 4H), 3.88 (s, 2H), 3.03 (s, 2H);  $^{13}\text{C}$  NMR (101 MHz, Chloroform-*d*)  $\delta$  135.61, 130.62, 130.42, 129.06, 128.00, 127.10, 126.32, 125.02, 124.27, 123.75, 35.09, 12.87;  $[\text{M}+\text{H}]^+$ : exact mass: 410.1671  
obtained mass:410.1670.

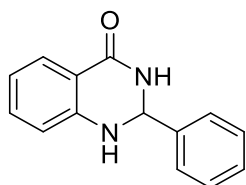

**2-phenyl-2,3-dihydroquinazolin-4(1H)-one(IV):**  $^1\text{H}$  NMR (400 MHz, Chloroform-*d*)  $\delta$  10.69 (s, 1H), 8.33 (d,  $J = 8.0$  Hz, 1H), 8.17 (d,  $J = 7.7$  Hz, 2H), 7.89 – 7.79 (m, 2H), 7.60 (dd,  $J = 5.1, 2.0$  Hz, 3H), 7.55 – 7.49 (m, 1H), 7.26 (s, 1H);  $^{13}\text{C}$  NMR (101 MHz, Chloroform-*d*)  $\delta$  163.07, 151.54, 135.01, 132.63, 131.85, 129.22, 127.96, 127.17, 126.98, 126.47, 120.91; exact mass: 224.0950 obtained mass:224.0951.

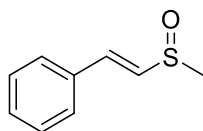

**(E)-(2-(methylsulfinyl)vinyl)benzene(A):**  $^1\text{H}$  NMR (400 MHz, Chloroform-*d*)  $\delta$  7.47 – 7.43 (m, 2H), 7.39 – 7.32 (m, 3H), 7.23 (d,  $J = 15.4$  Hz, 1H), 6.88 (d,  $J = 15.5$  Hz, 1H), 2.68 (s, 3H);  $^{13}\text{C}$  NMR (101 MHz, Chloroform-*d*)  $\delta$  171.10, 136.32, 133.73, 132.28, 129.74, 128.94, 127.65, 60.36, 40.95, 21.02, 14.19; exact mass: 166.0452  
obtained mass:166.0452.

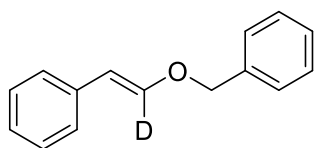

**d-4a:**  $^1\text{H}$  NMR (400 MHz, Chloroform-*d*)  $\delta$  7.39 (d,  $J = 4.1$  Hz, 4H), 7.35 – 7.33 (m, 1H), 7.25 – 7.20 (m, 4H), 7.13 (t,  $J = 6.8$  Hz, 1H), 5.95 (s, 1H), 4.90 (s, 2H);  $^{13}\text{C}$

NMR (101 MHz, Chloroform-*d*)  $\delta$  146.66, 135.70, 128.60, 127.57, 127.34, 127.08, 126.67, 126.58, 124.74, 124.13, 105.66; exact mass: 211.1107 obtained mass:211.1107.

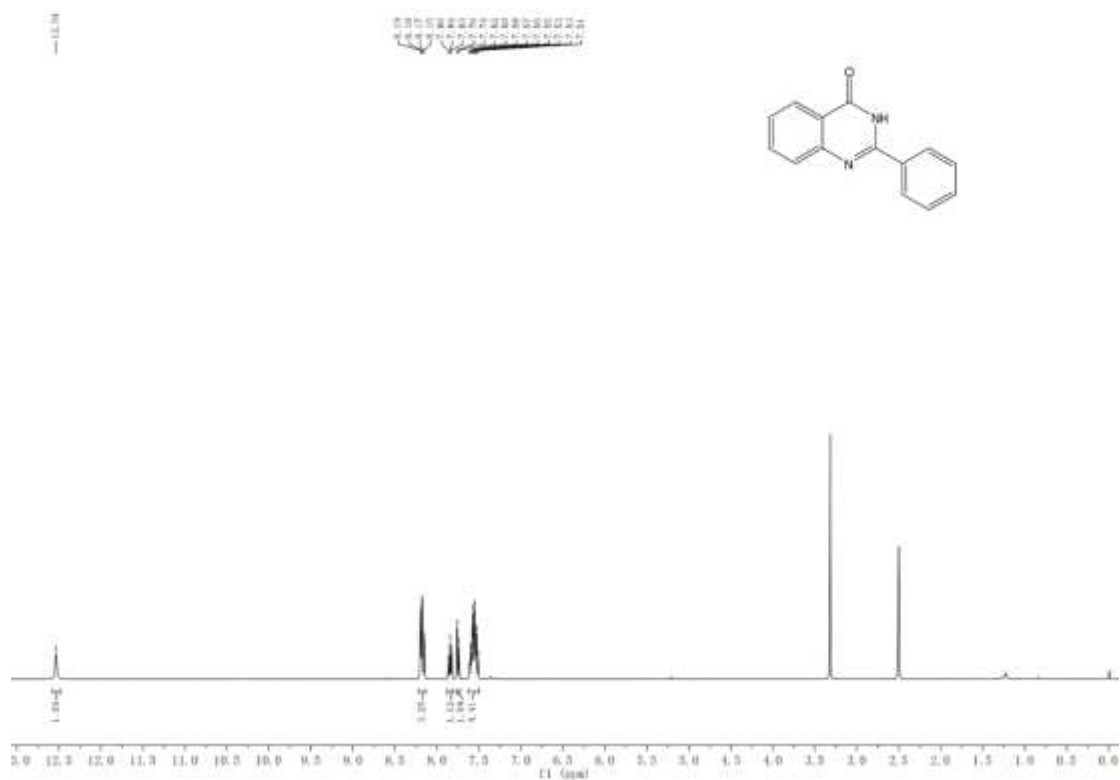

Figure S6. <sup>1</sup>H NMR spectrum of compound **3a**

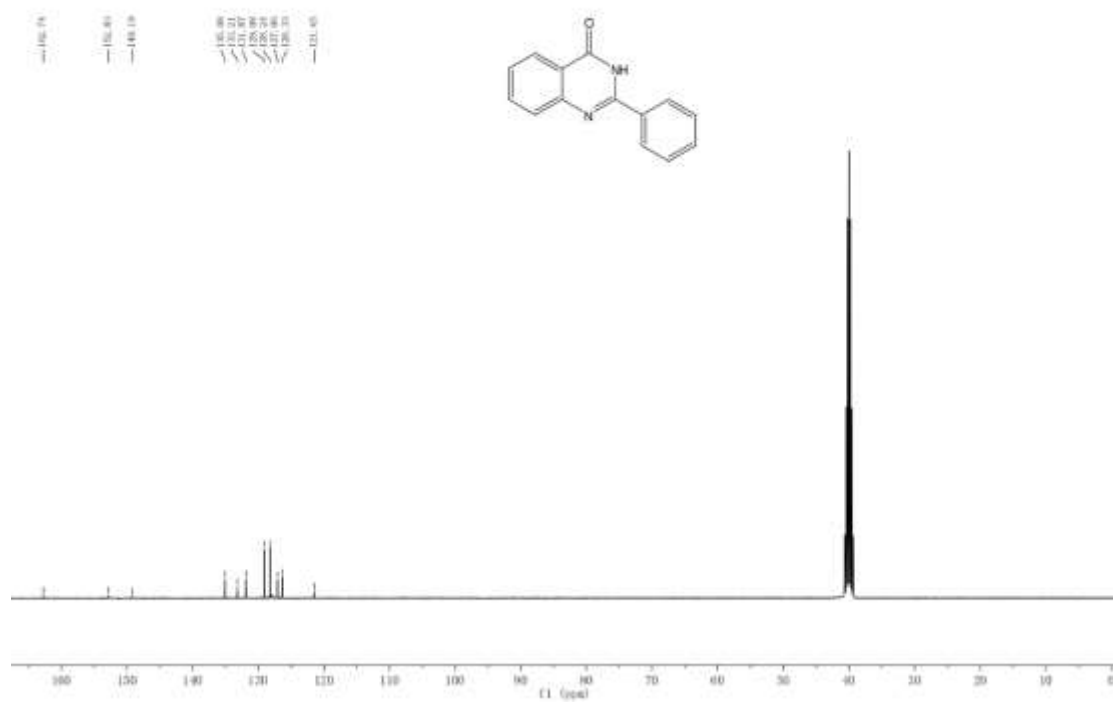

Figure S7.  $^{13}\text{C}$  NMR spectrum of compound **3a**

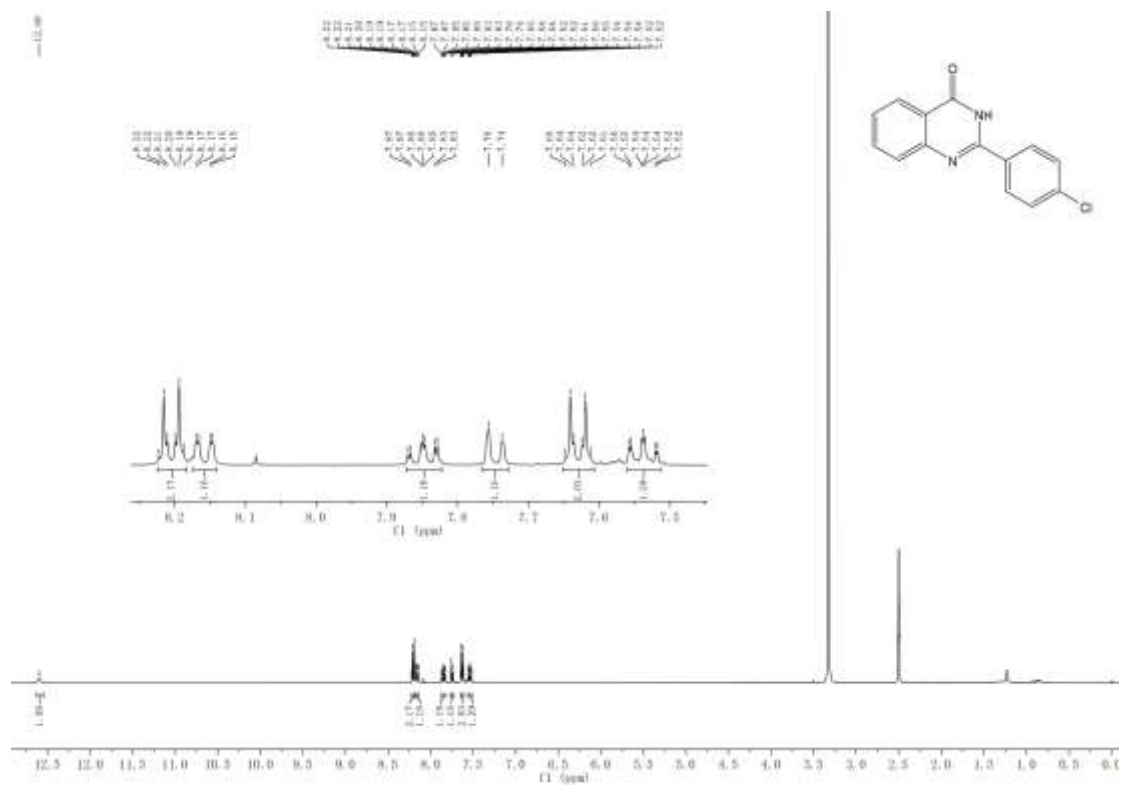

Figure S8.  $^1\text{H}$  NMR spectrum of compound **3b**



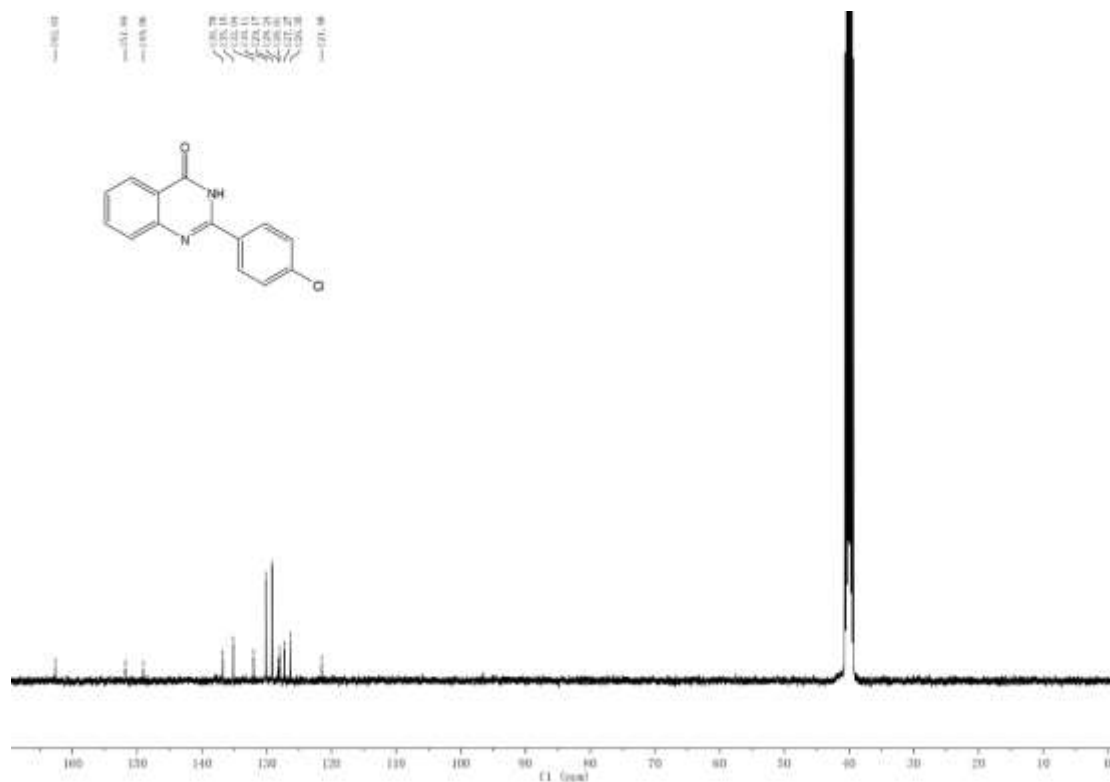

Figure S9.  $^{13}\text{C}$  NMR spectrum of compound **3b**

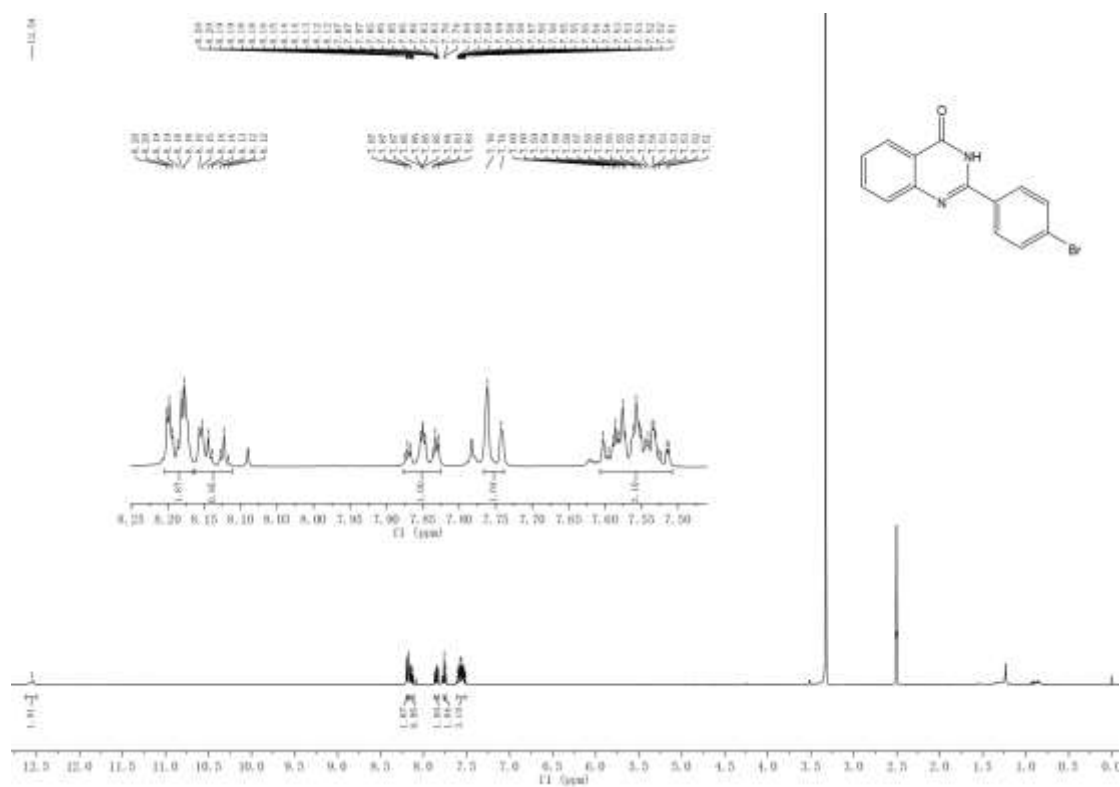

Figure S10.  $^1\text{H}$  NMR spectrum of compound **3c**

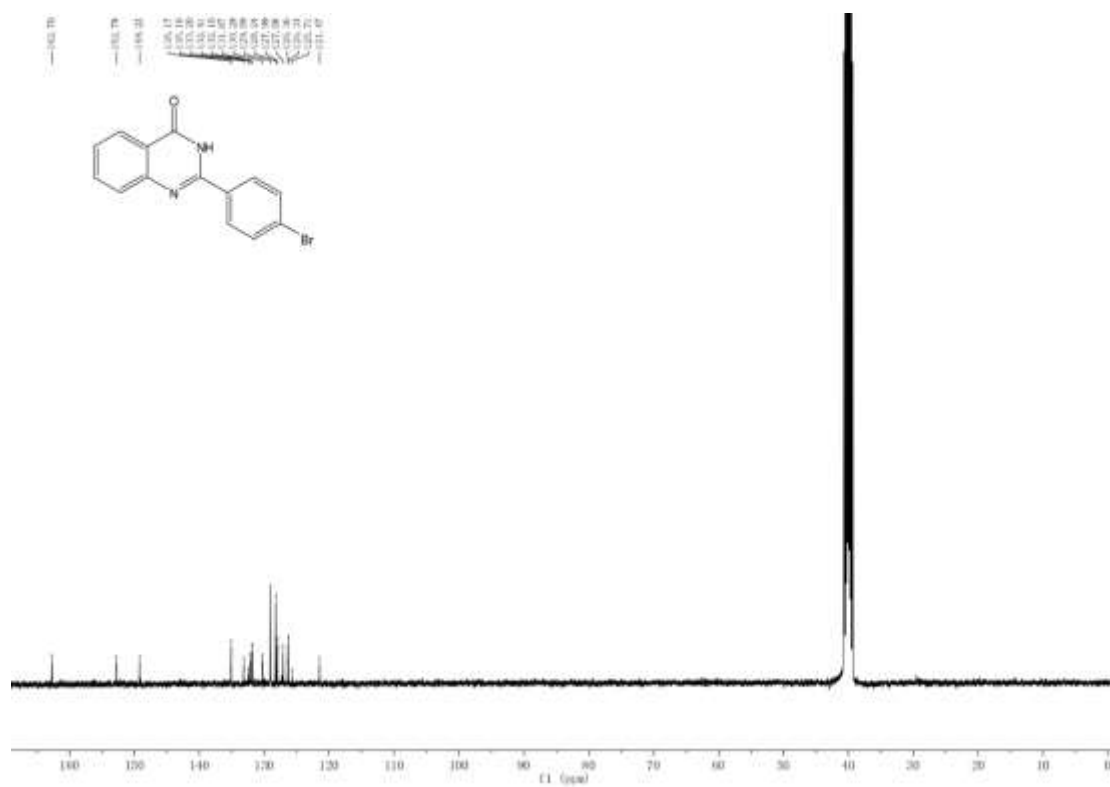

Figure S11.  $^{13}\text{C}$  NMR spectrum of compound 3c

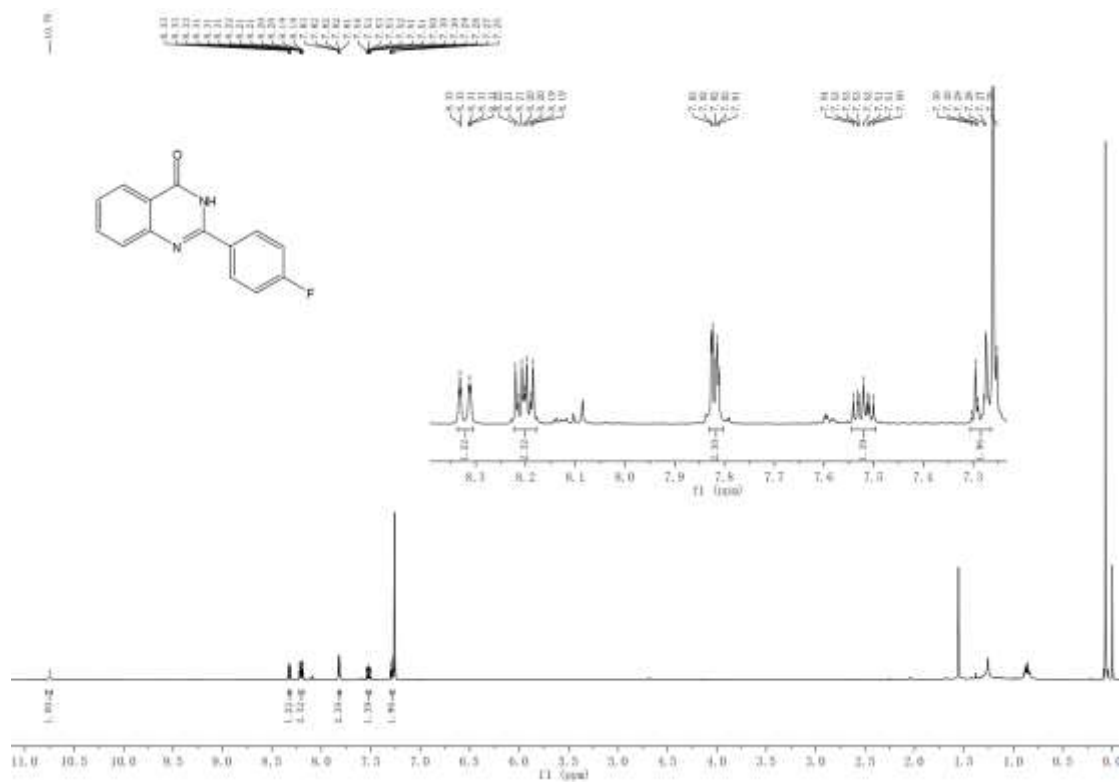

Figure S12.  $^1\text{H}$  NMR spectrum of compound 3d

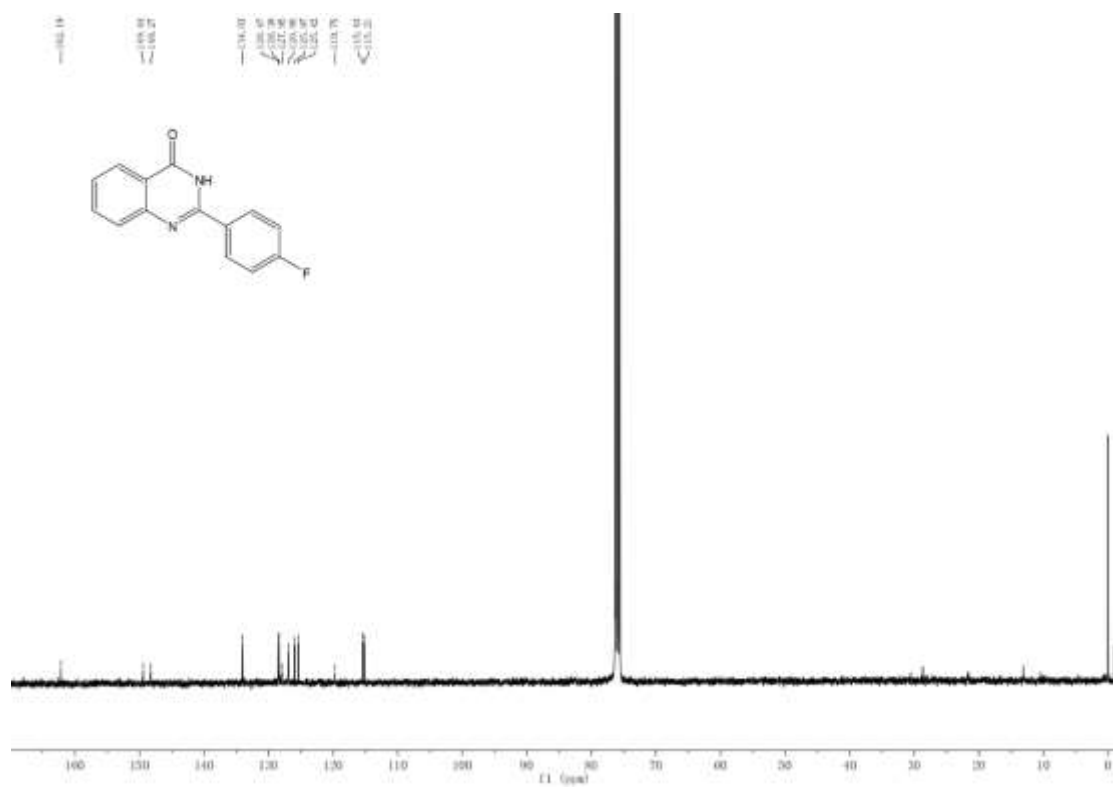

Figure S13. <sup>13</sup>C NMR spectrum of compound **3d**

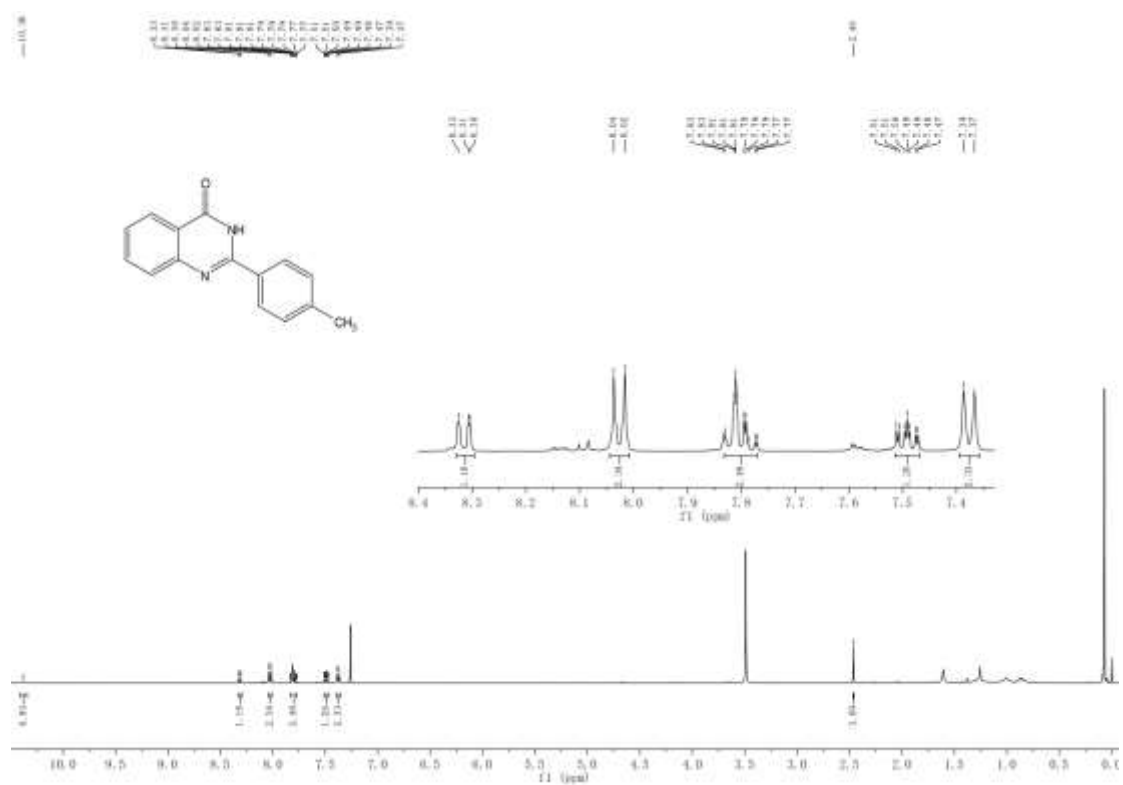

Figure S14. <sup>1</sup>H NMR spectrum of compound **3e**





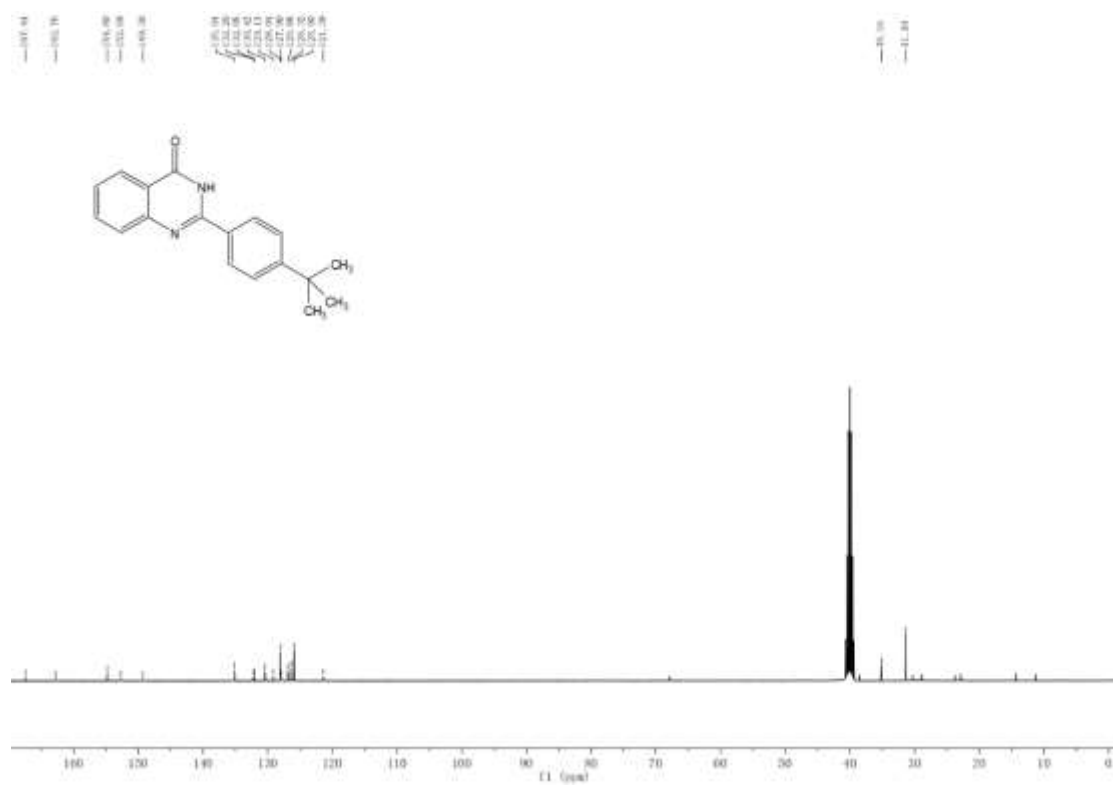

Figure S19. <sup>13</sup>C NMR spectrum of compound **3g**

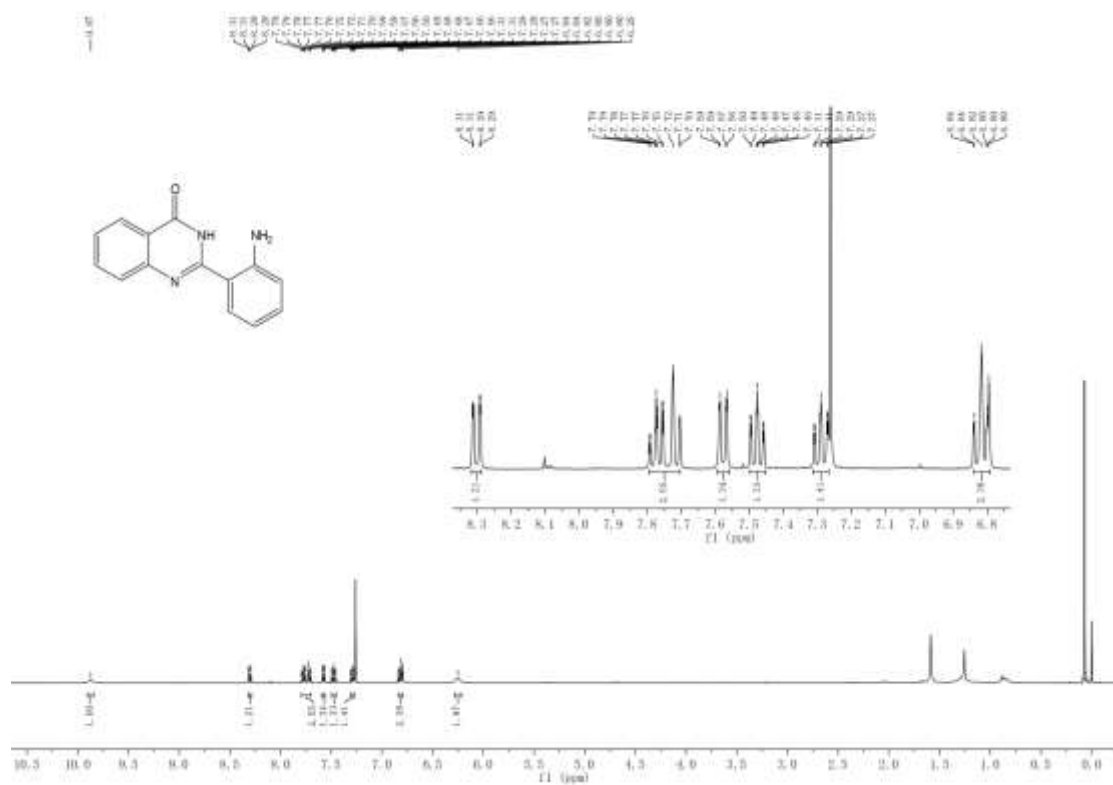

Figure S20. <sup>1</sup>H NMR spectrum of compound **3h**

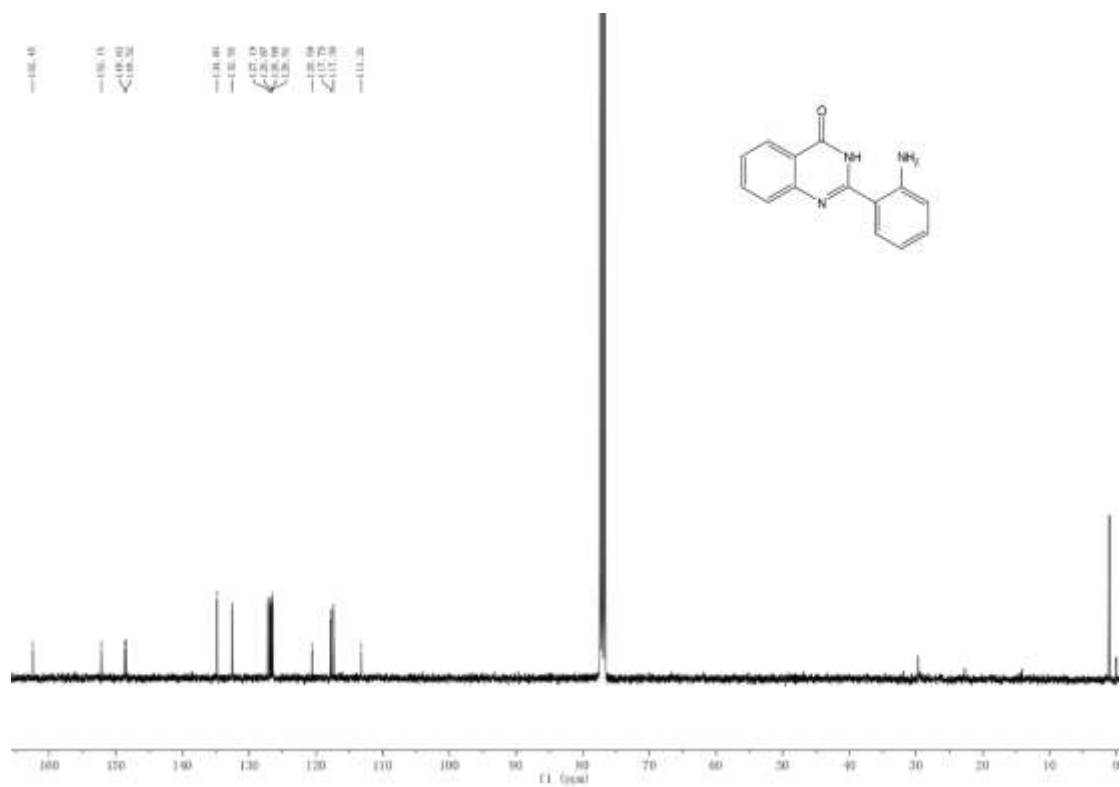

Figure S21.  $^{13}\text{C}$  NMR spectrum of compound **3h**

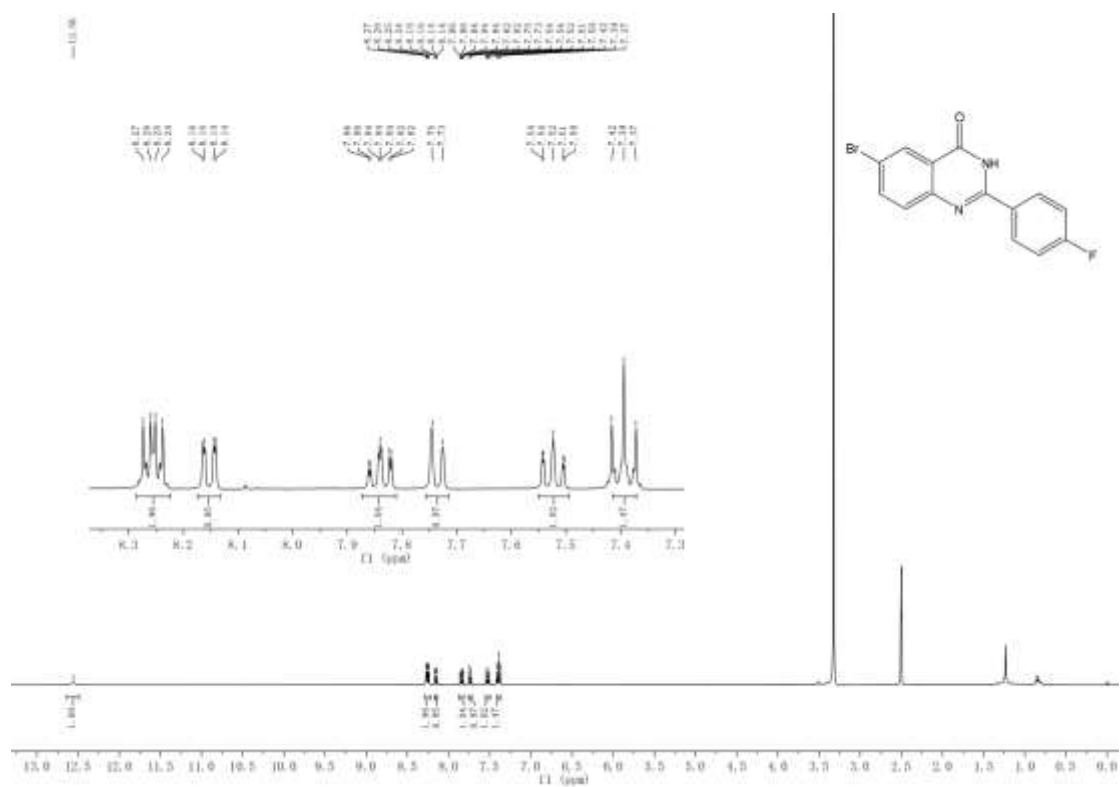

Figure S22.  $^1\text{H}$  NMR spectrum of compound **3i**

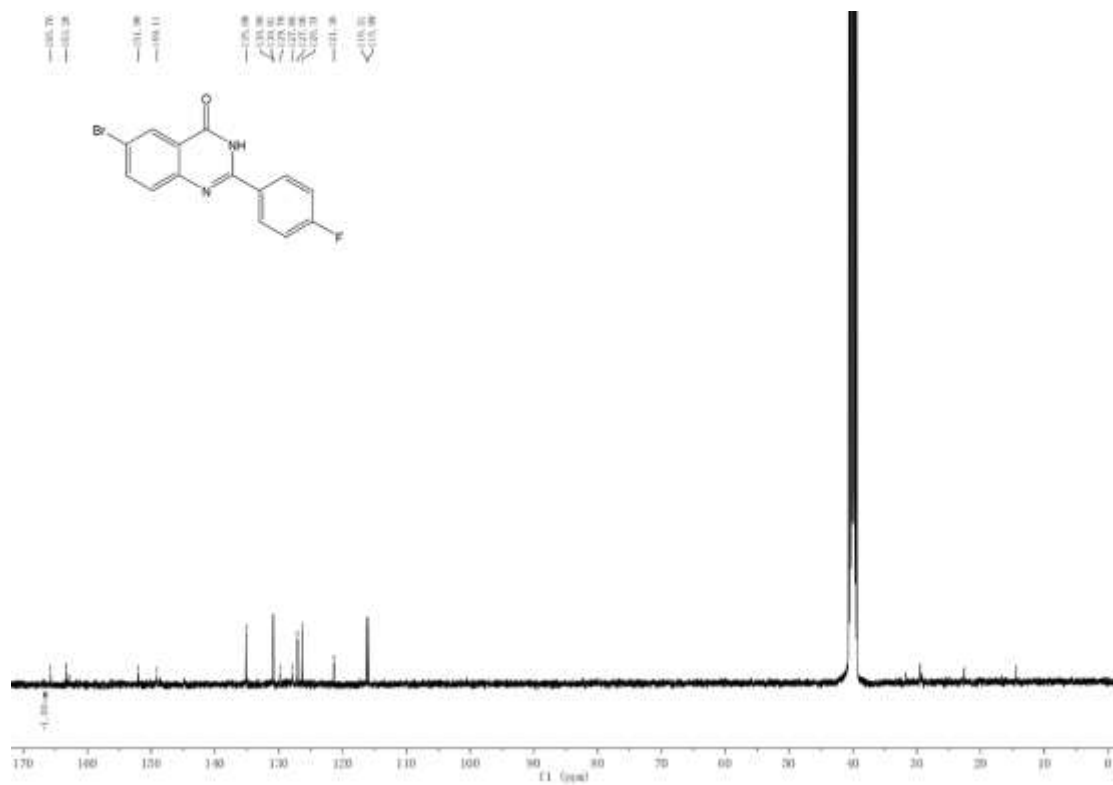

Figure S23.  $^{13}\text{C}$  NMR spectrum of compound **3i**

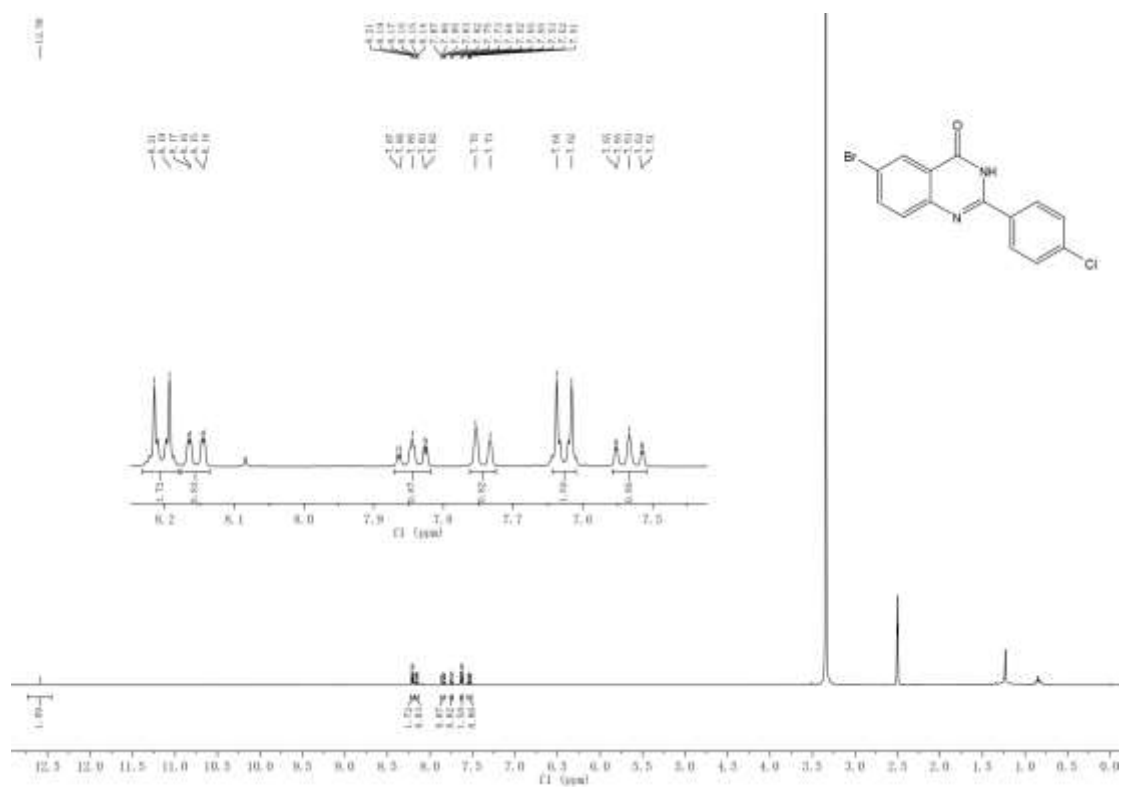

Figure S24.  $^1\text{H}$  NMR spectrum of compound **3j**



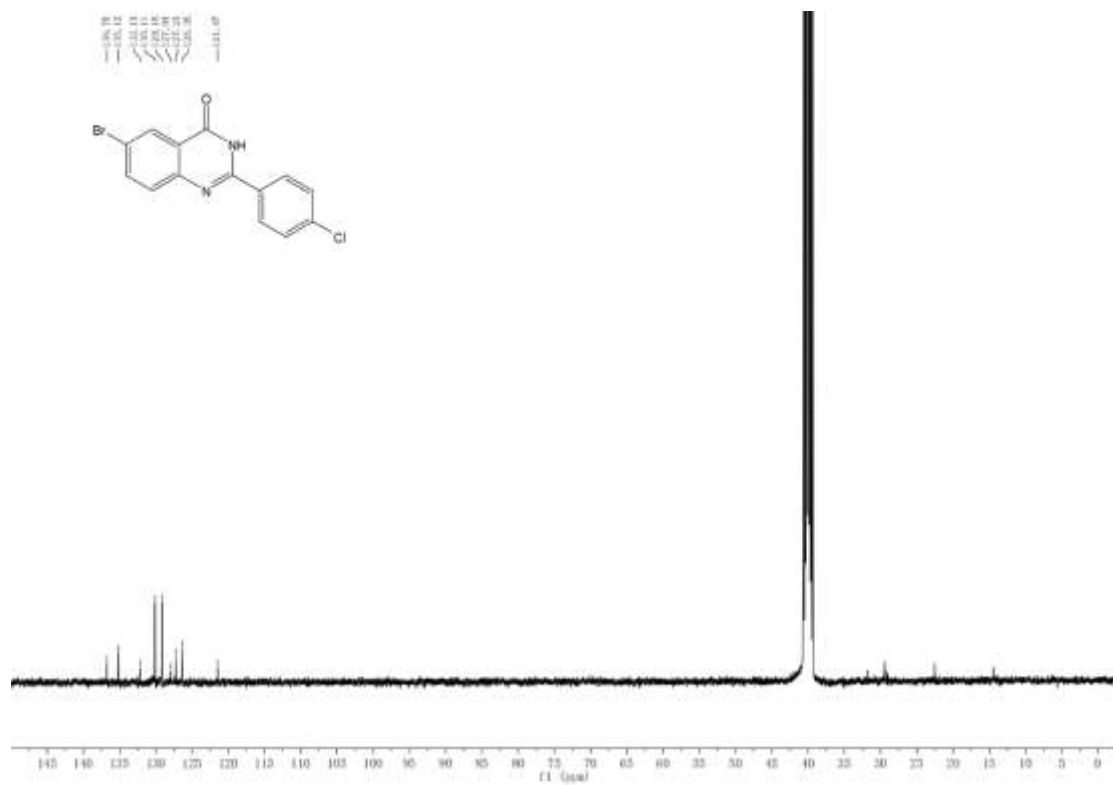

Figure S25.  $^{13}\text{C}$  NMR spectrum of compound **3j**

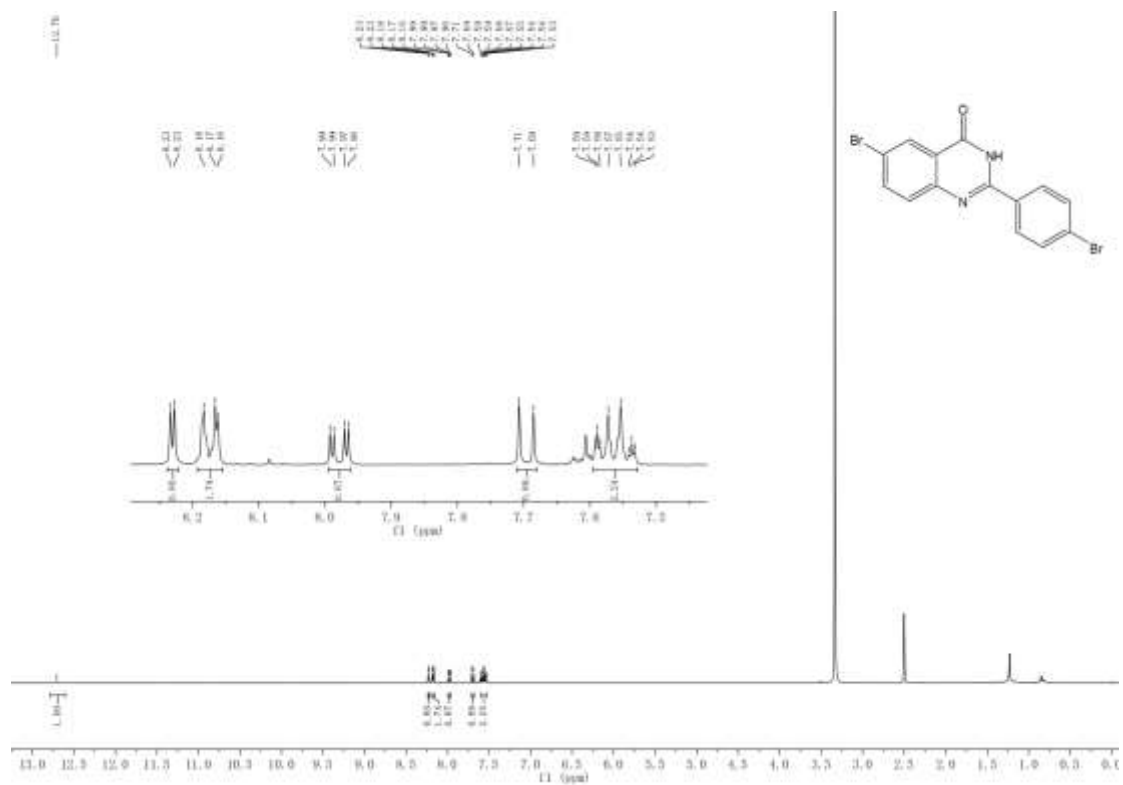

Figure S26.  $^1\text{H}$  NMR spectrum of compound **3k**

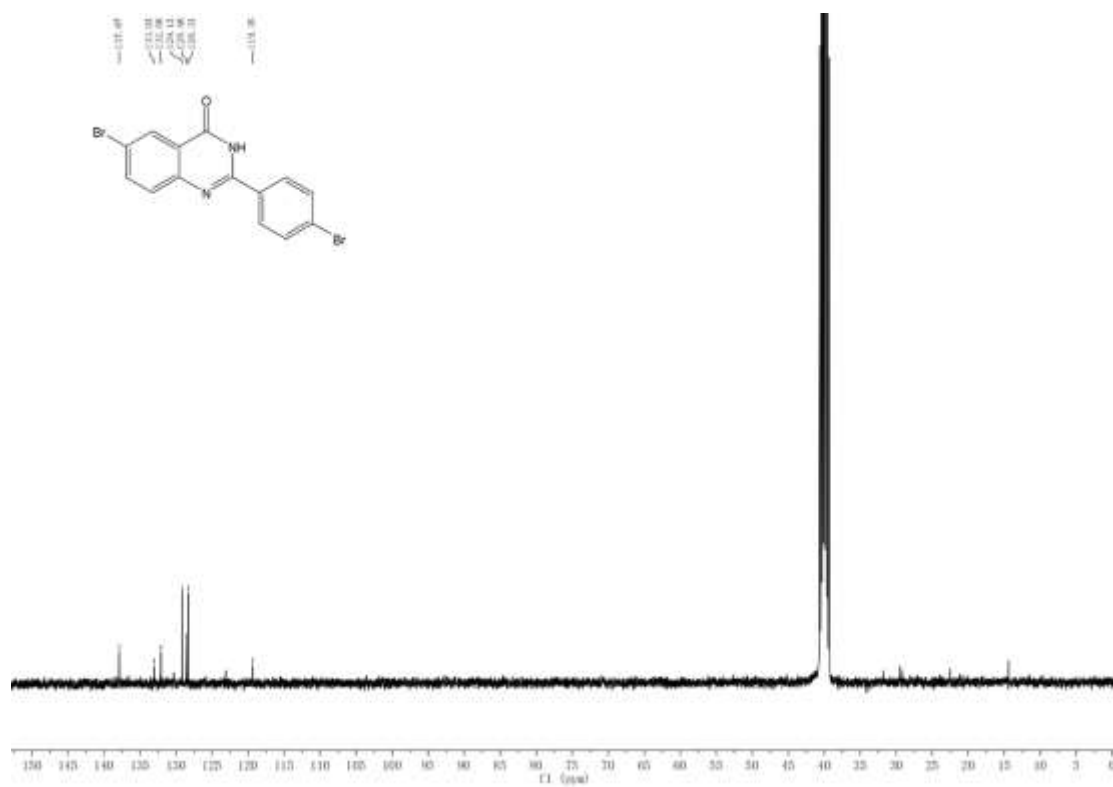

Figure S27.  $^{13}\text{C}$  NMR spectrum of compound **3k**

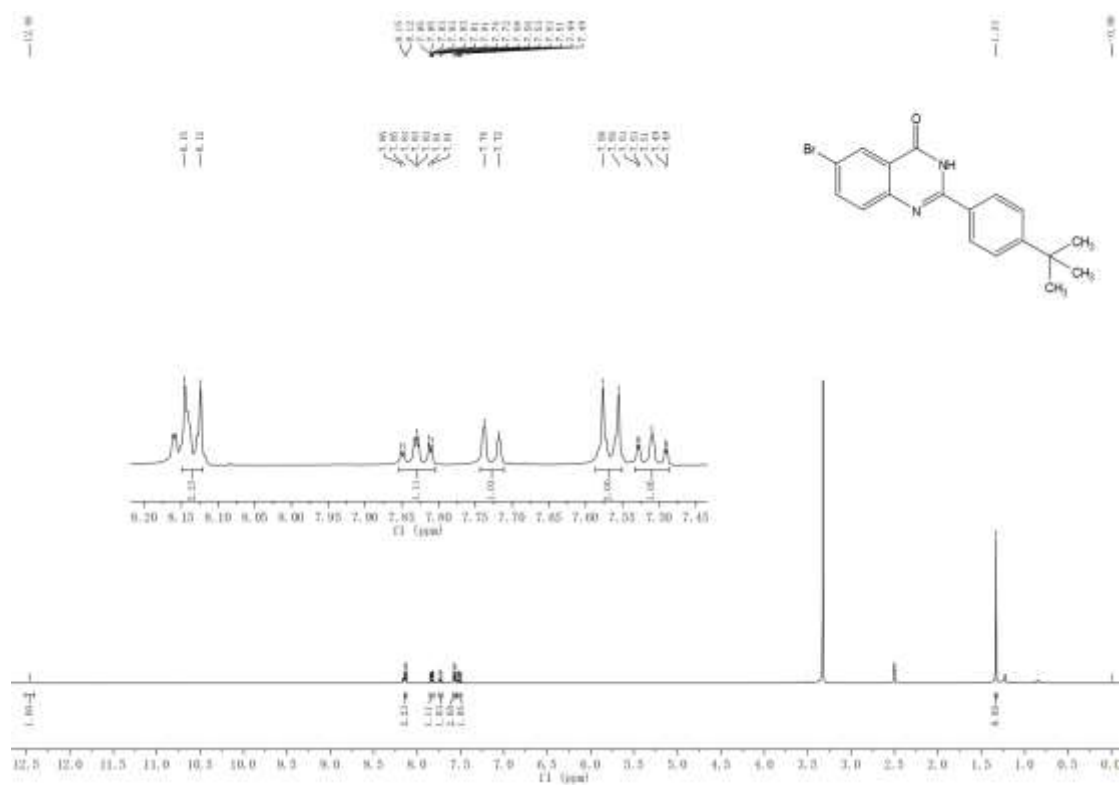

Figure S28.  $^1\text{H}$  NMR spectrum of compound **3l**

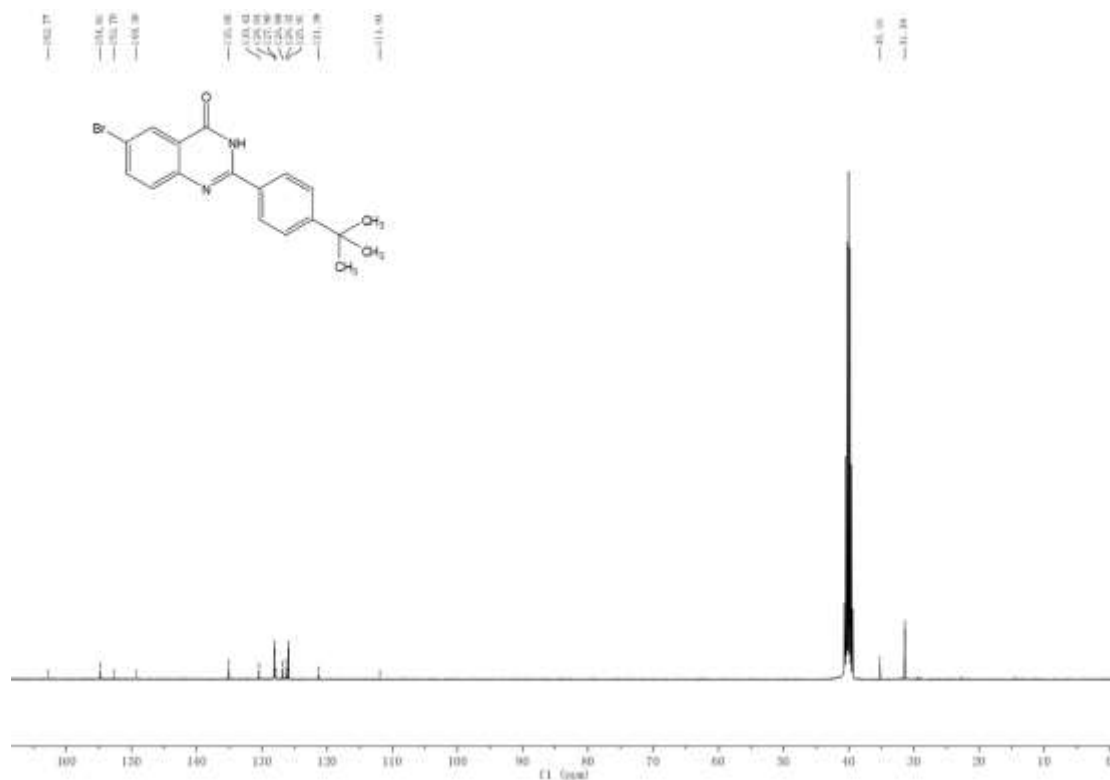

Figure S29.  $^{13}\text{C}$  NMR spectrum of compound **3l**

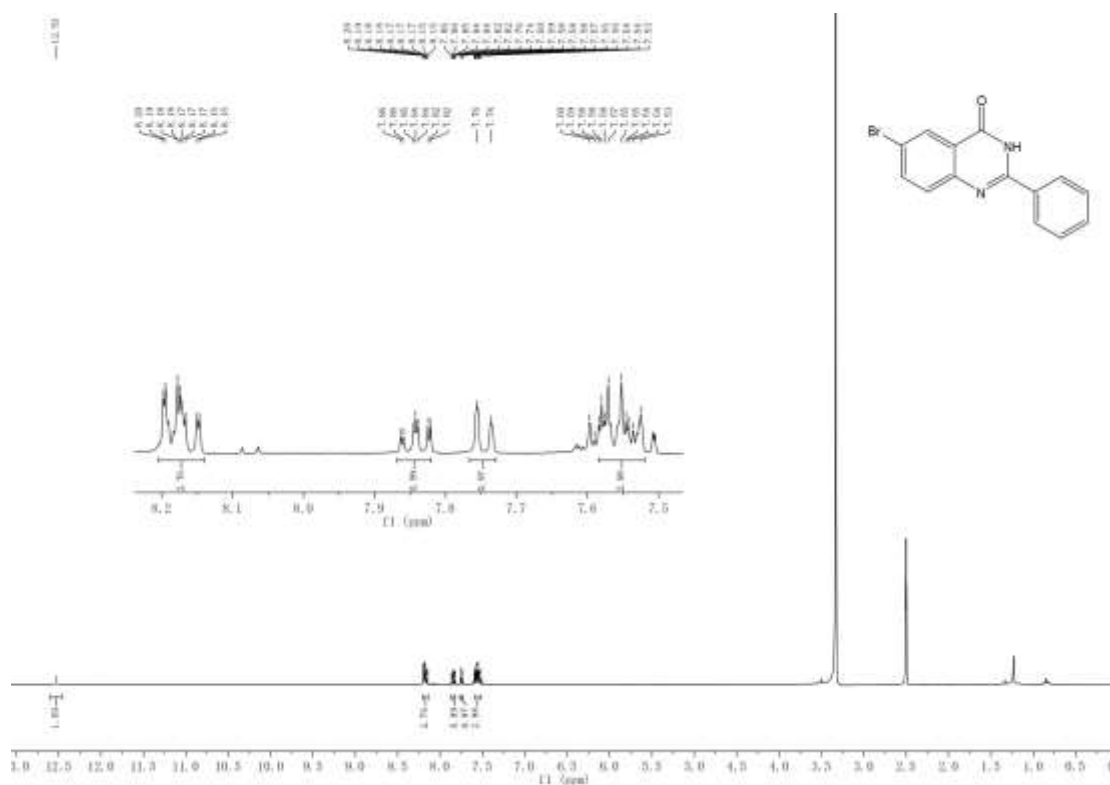

Figure S30.  $^1\text{H}$  NMR spectrum of compound **3m**



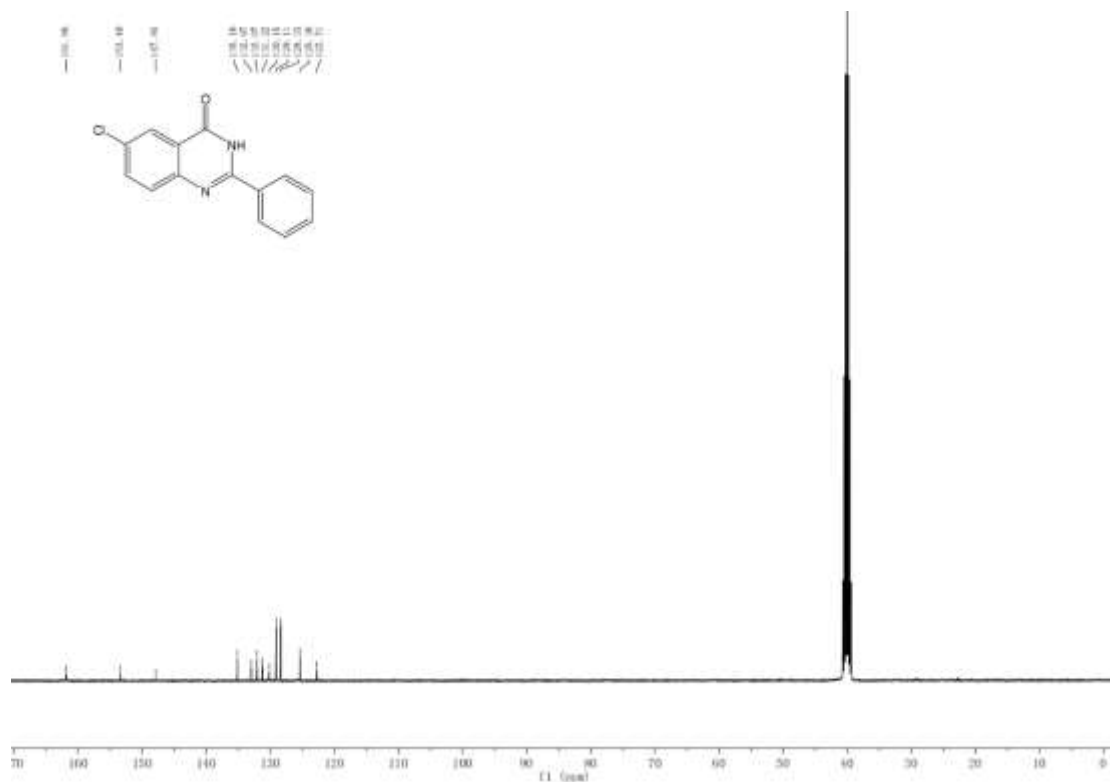

Figure S33.  $^{13}\text{C}$  NMR spectrum of compound **3n**

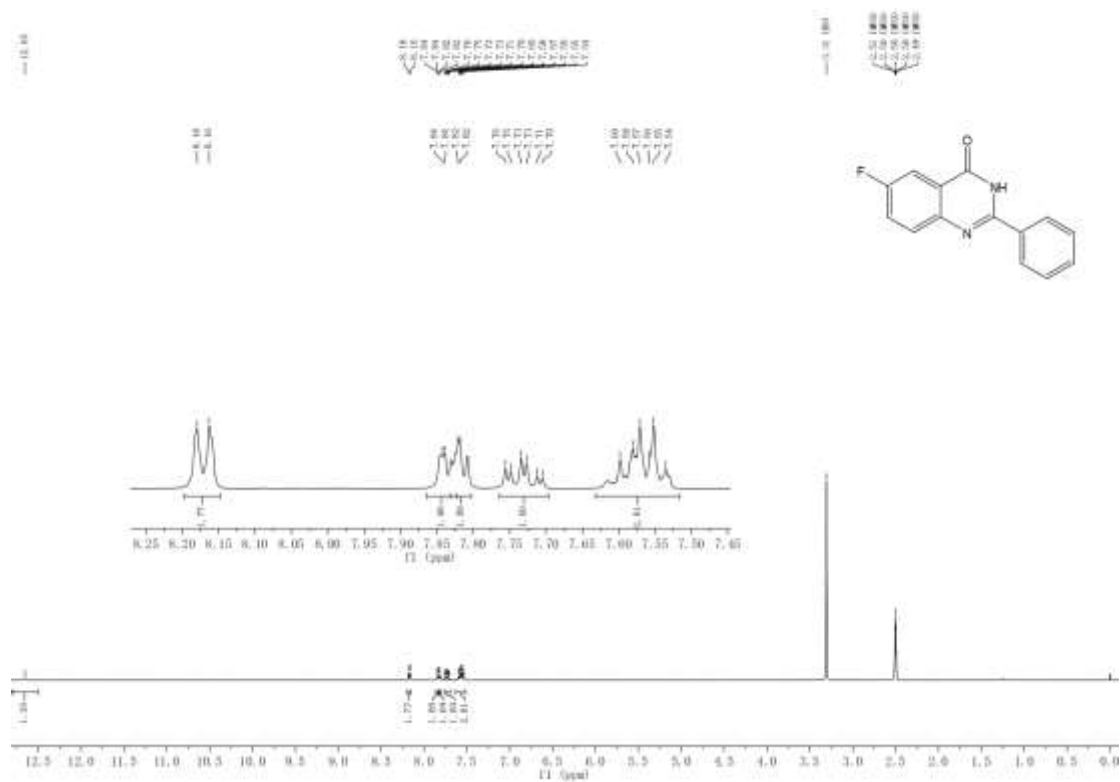

Figure S34.  $^1\text{H}$  NMR spectrum of compound **3o**

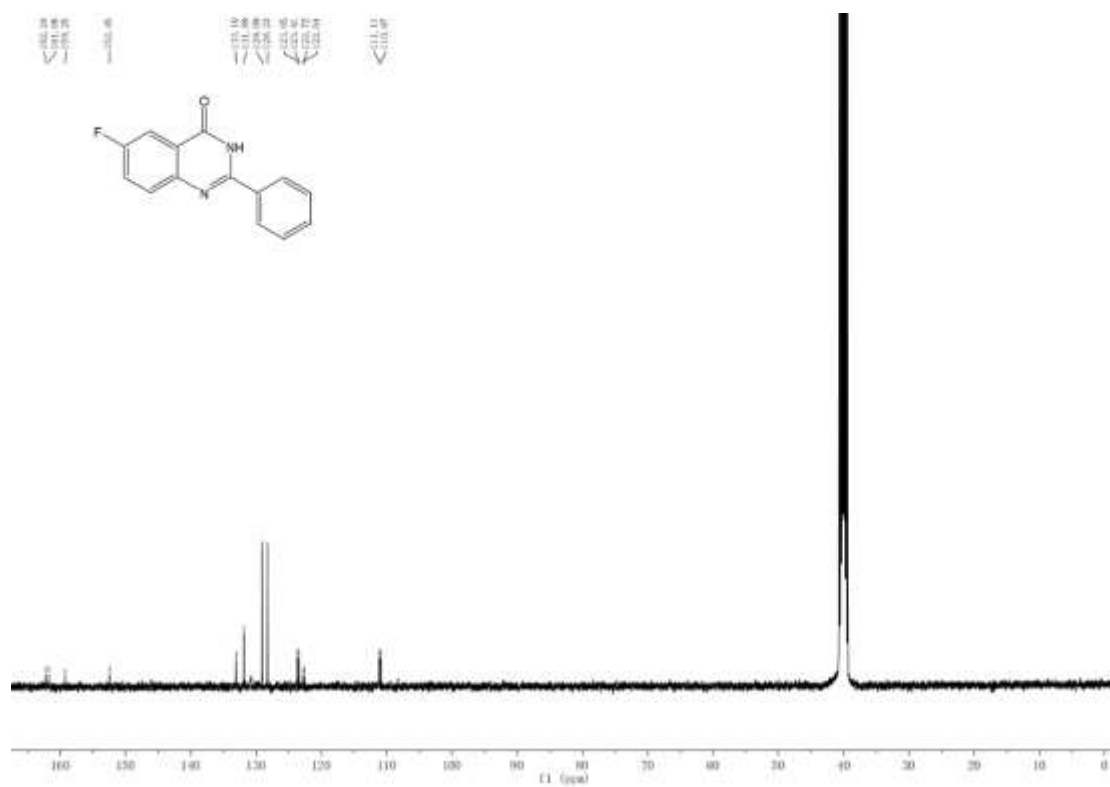

Figure S35.  $^{13}\text{C}$  NMR spectrum of compound **3o**

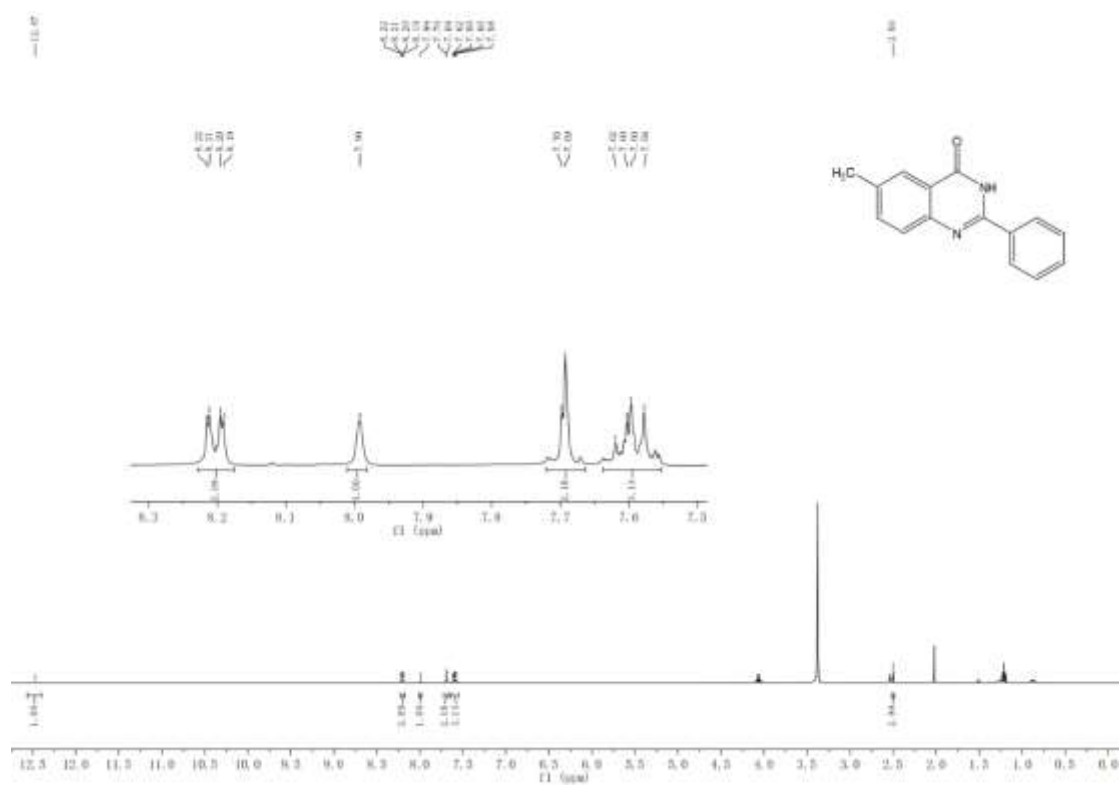

Figure S36.  $^1\text{H}$  NMR spectrum of compound **3p**

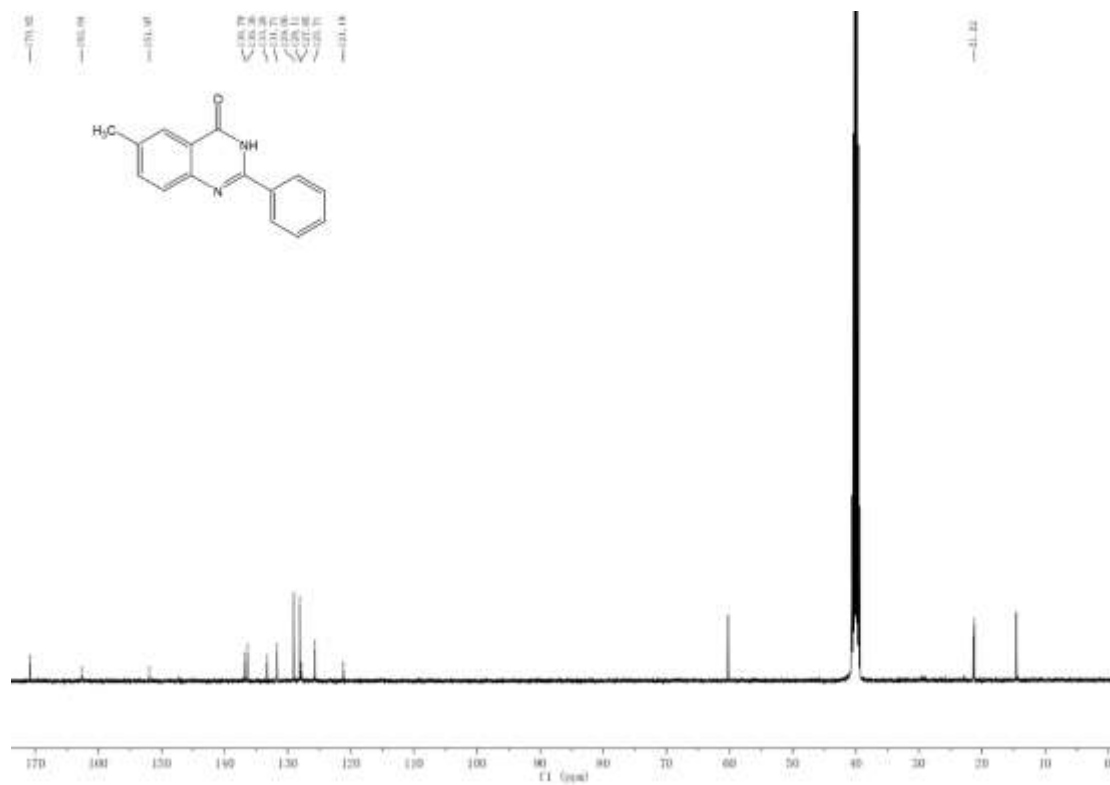

Figure S37.  $^{13}\text{C}$  NMR spectrum of compound **3p**

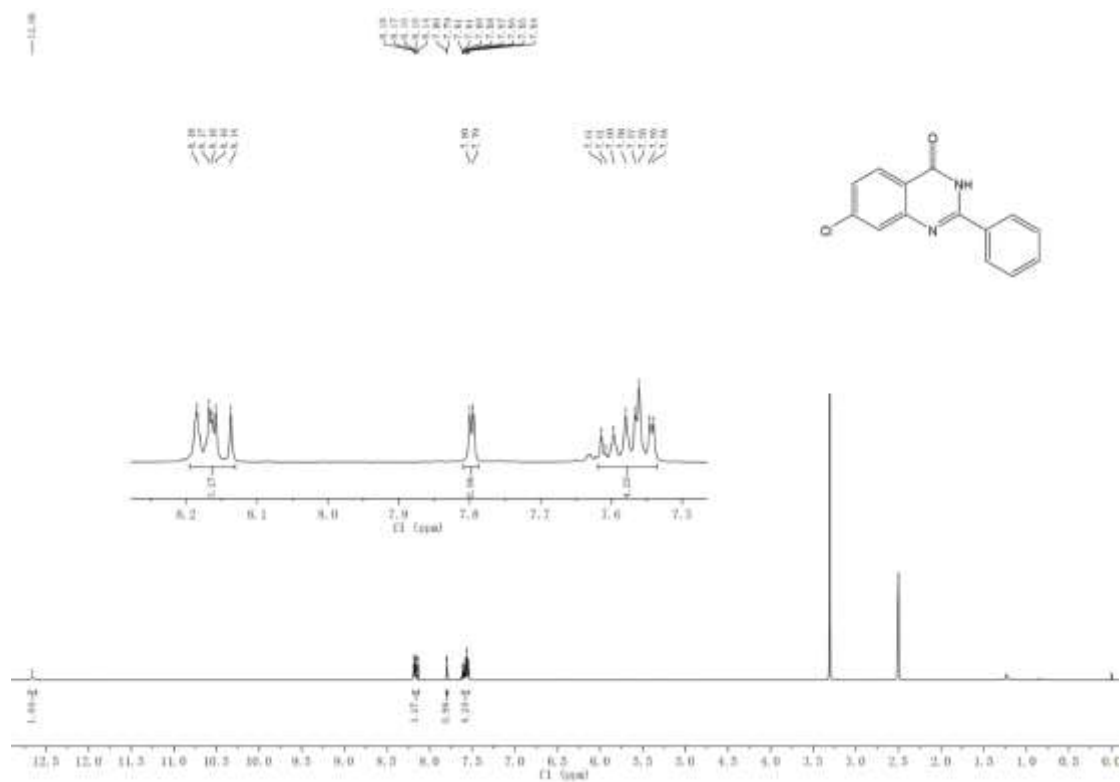

Figure S38.  $^1\text{H}$  NMR spectrum of compound **3q**





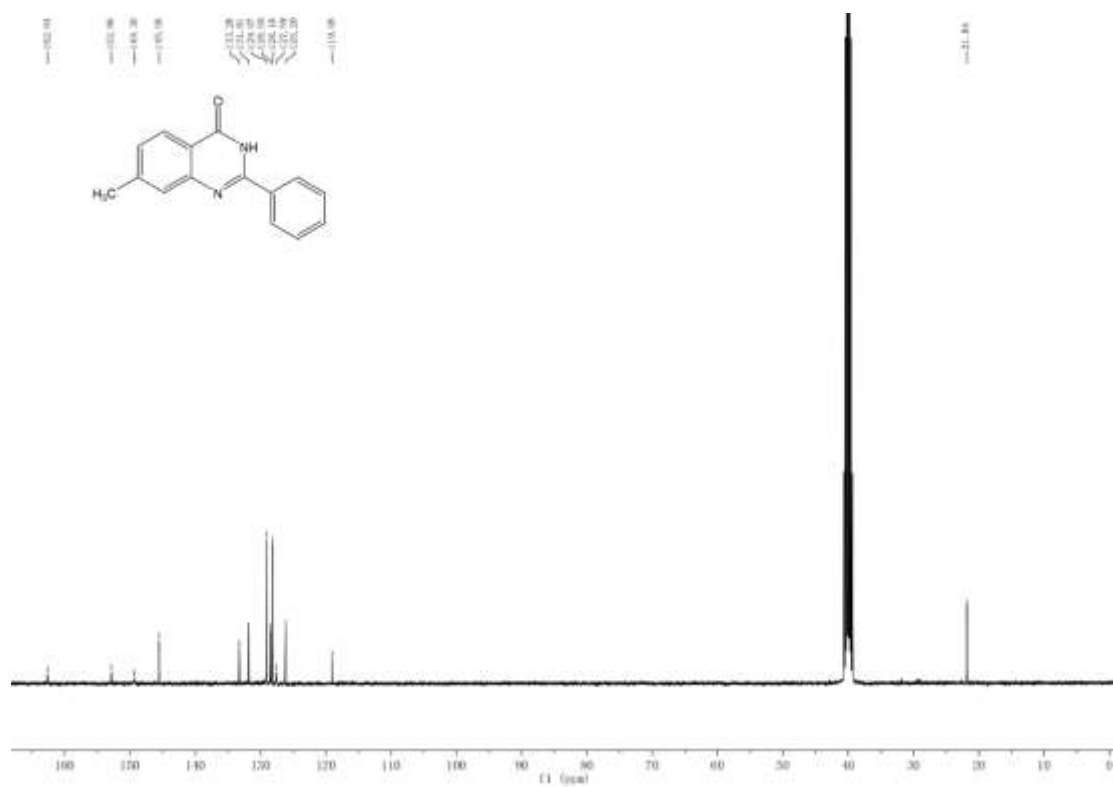

Figure S41.  $^{13}\text{C}$  NMR spectrum of compound **3r**

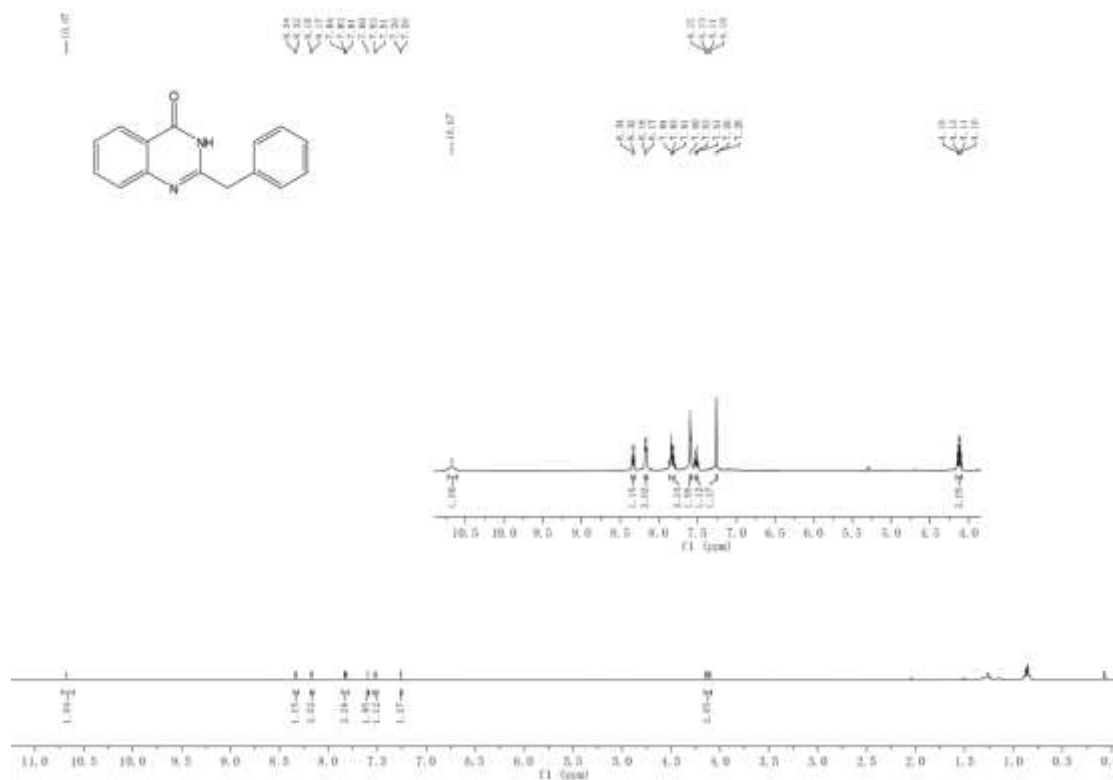

Figure S42.  $^1\text{H}$  NMR spectrum of compound **3s**

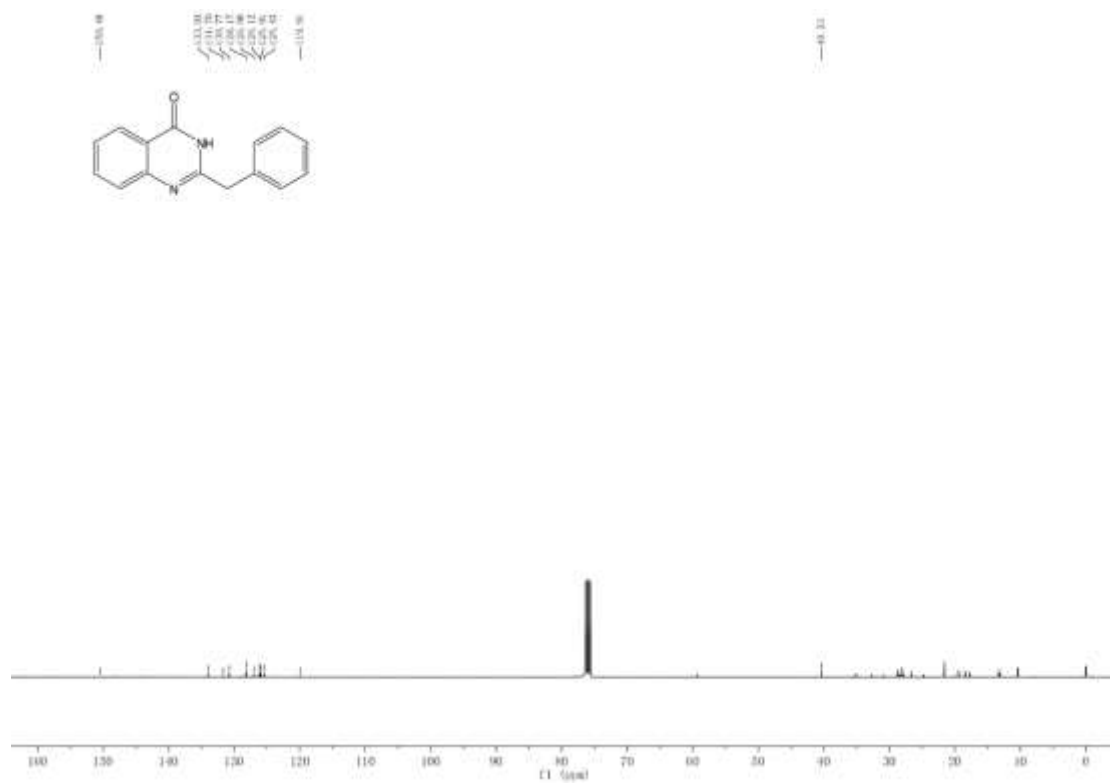

Figure S43.  $^{13}\text{C}$  NMR spectrum of compound **3s**

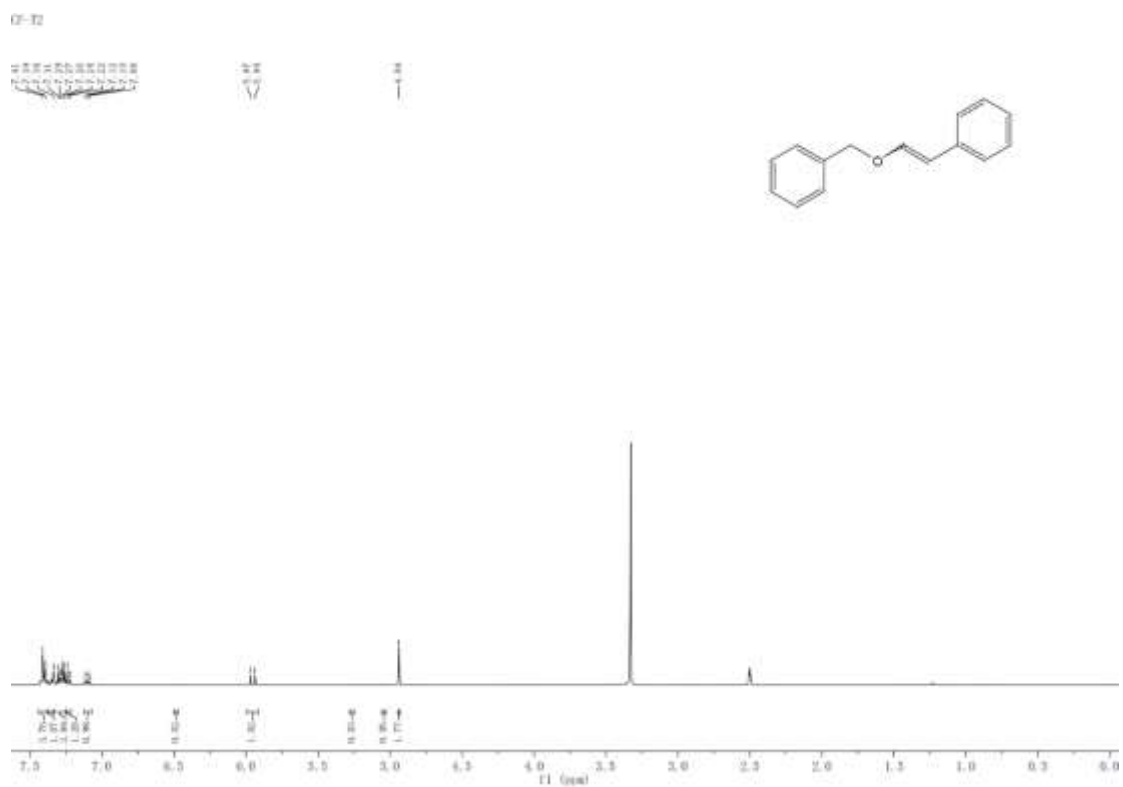

Figure S44.  $^1\text{H}$  NMR spectrum of compound **4a**



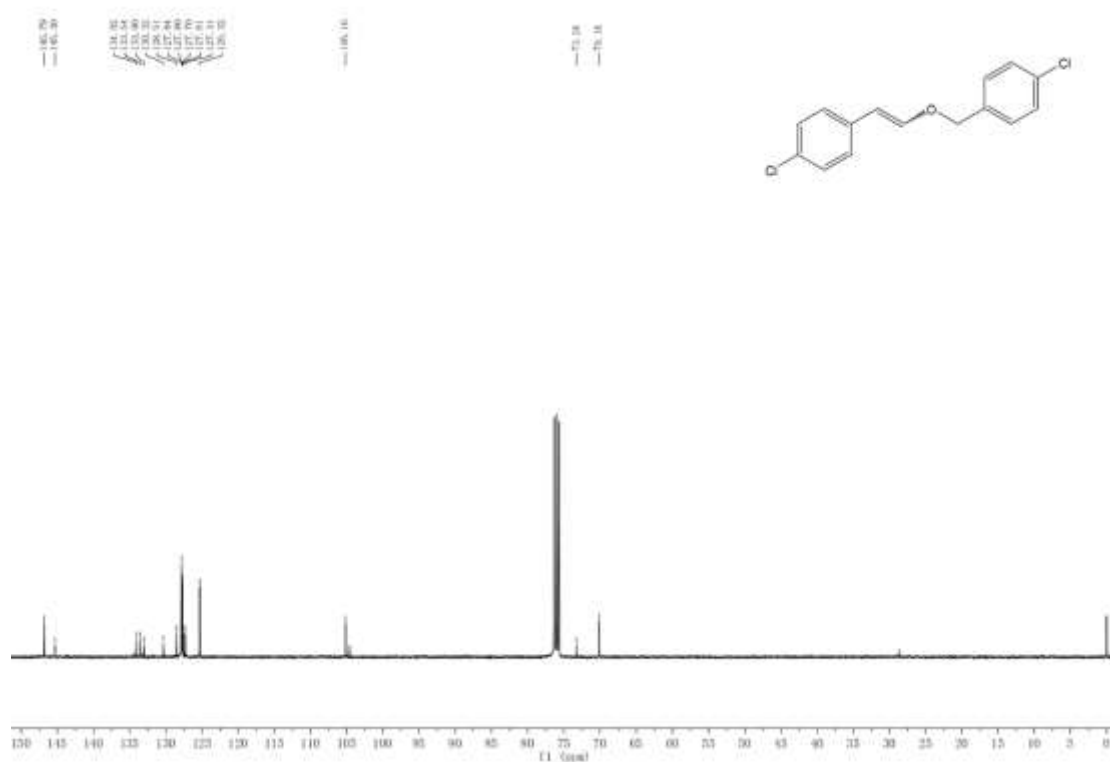

Figure S47.  $^{13}\text{C}$  NMR spectrum of compound **4b**

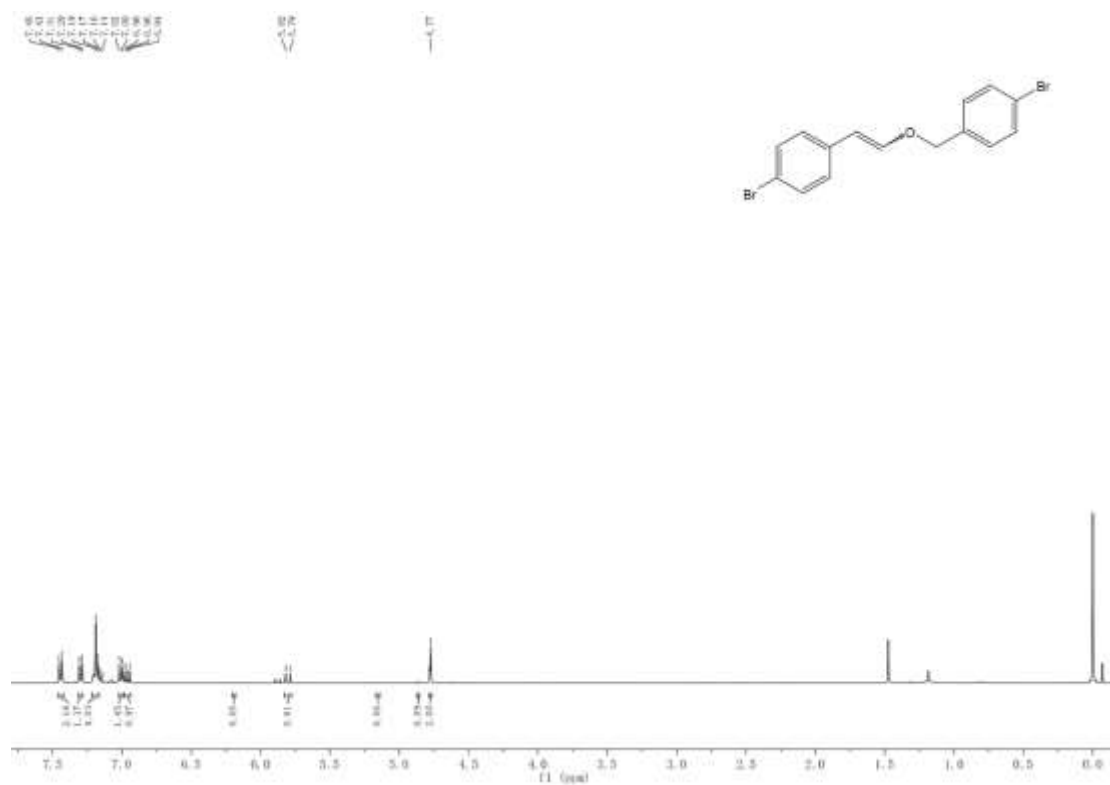

Figure S48.  $^1\text{H}$  NMR spectrum of compound **4c**

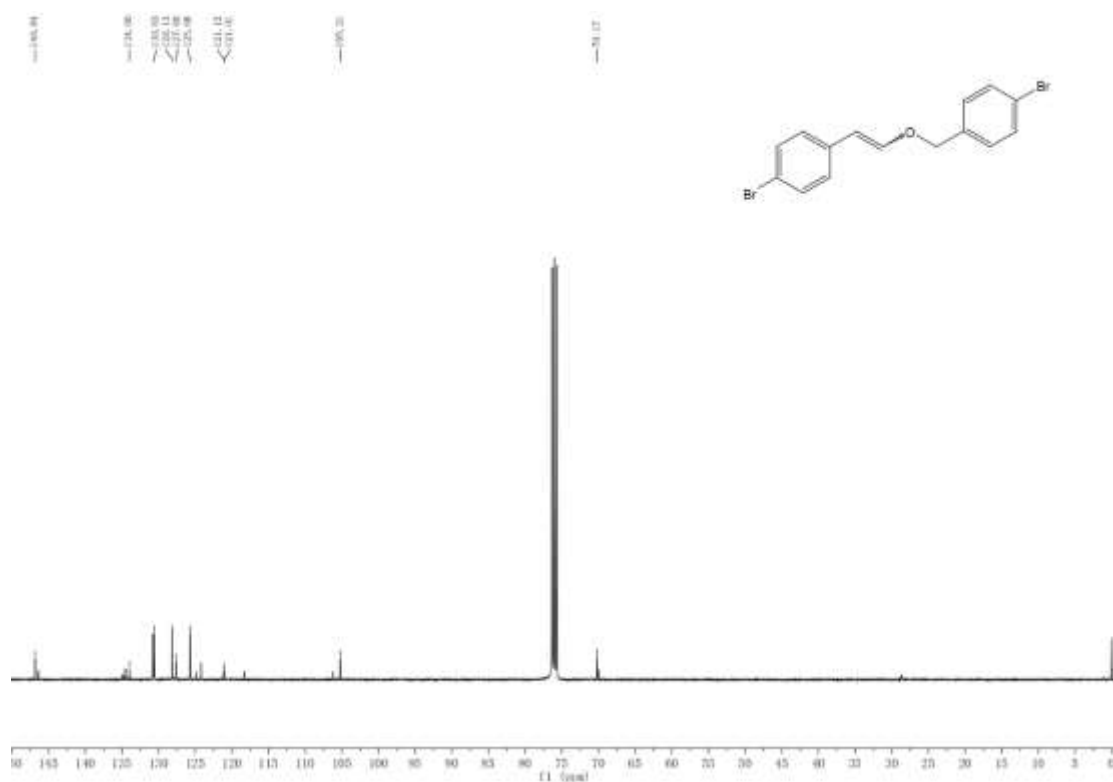

Figure S49. <sup>13</sup>C NMR spectrum of compound **4c**

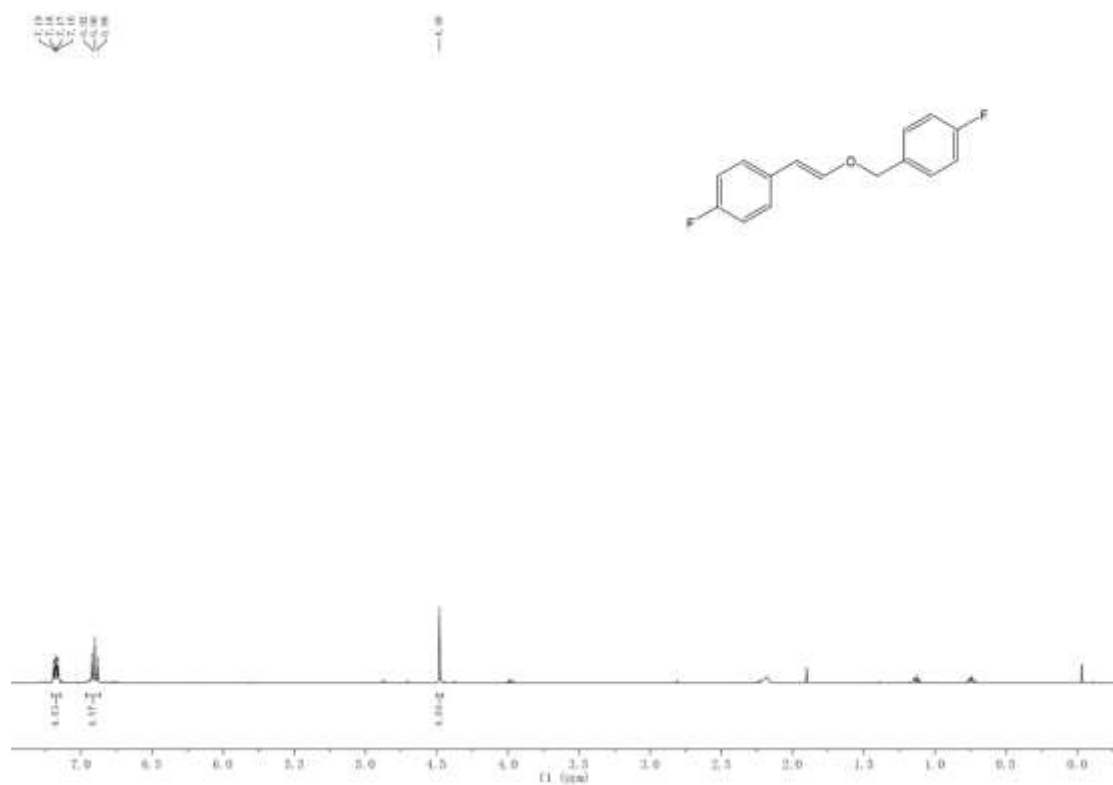

Figure S50. <sup>1</sup>H NMR spectrum of compound **4d**



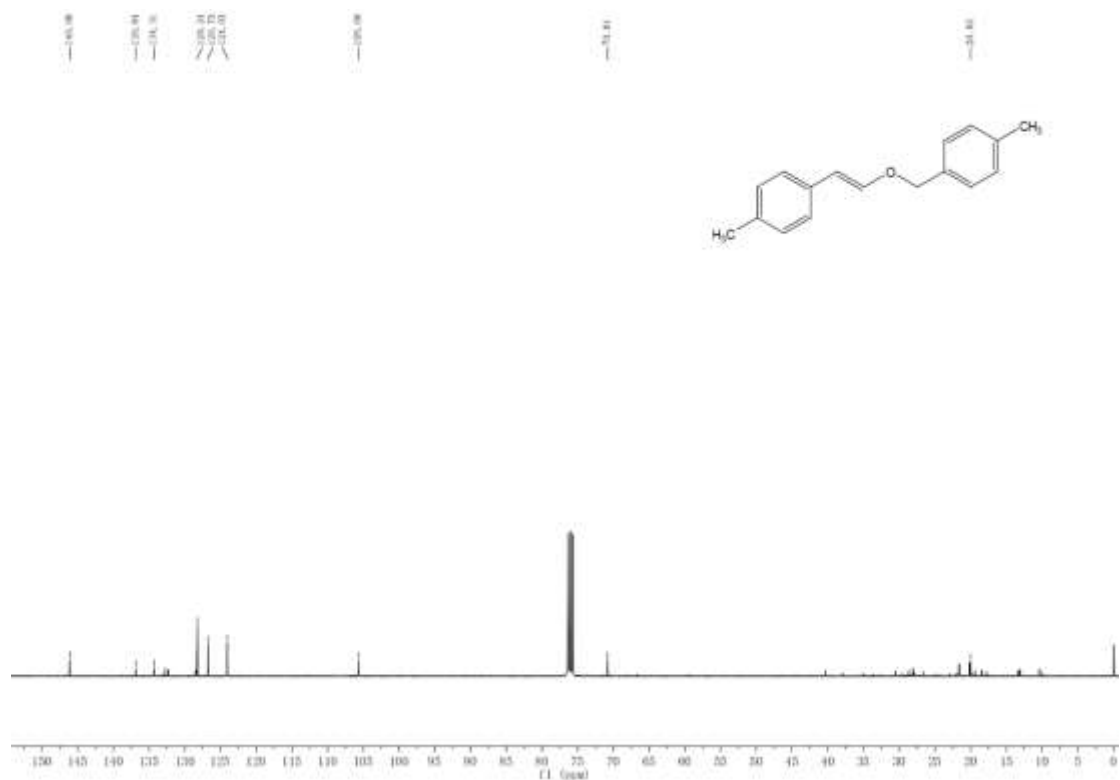

Figure S53.  $^{13}\text{C}$  NMR spectrum of compound **4e**

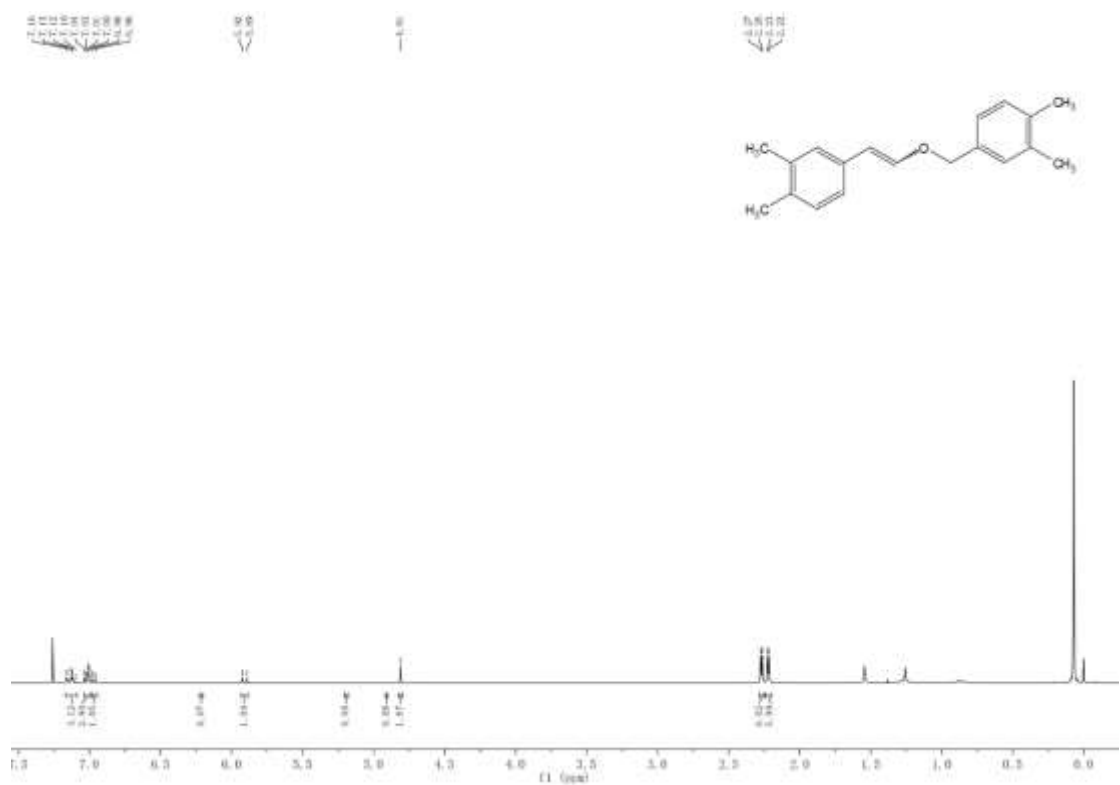

Figure S54.  $^1\text{H}$  NMR spectrum of compound **4f**

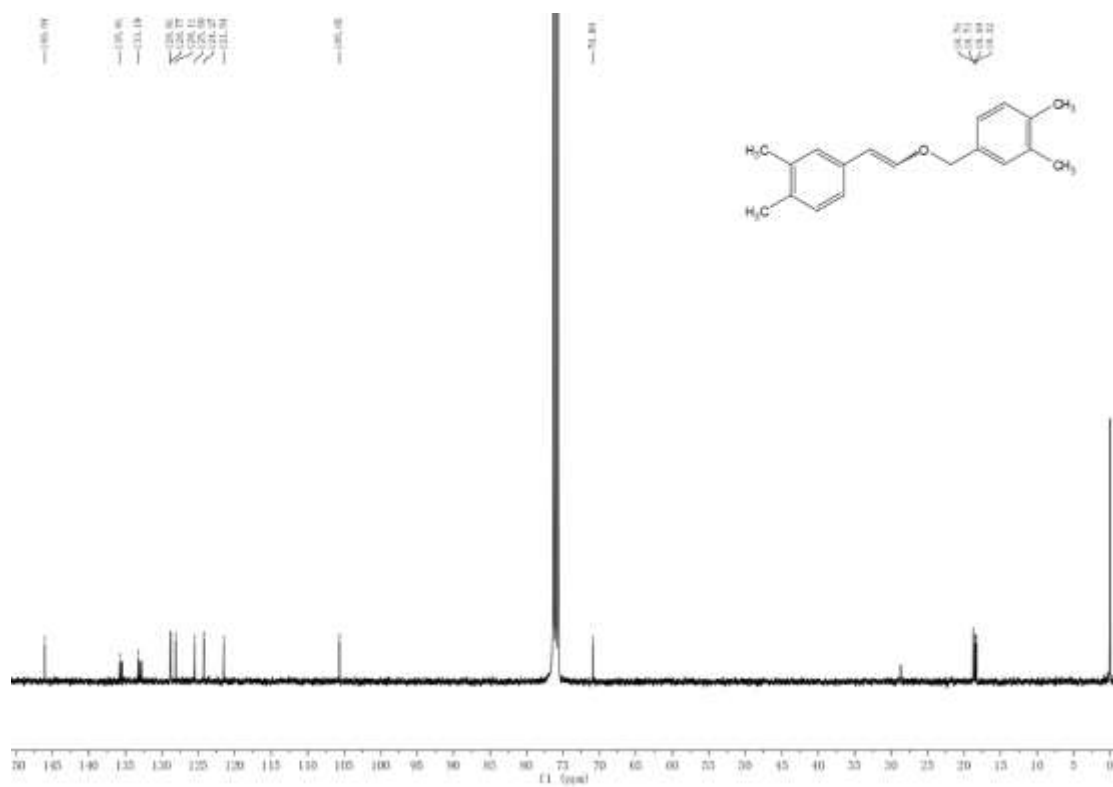

Figure S55.  $^{13}\text{C}$  NMR spectrum of compound **4f**

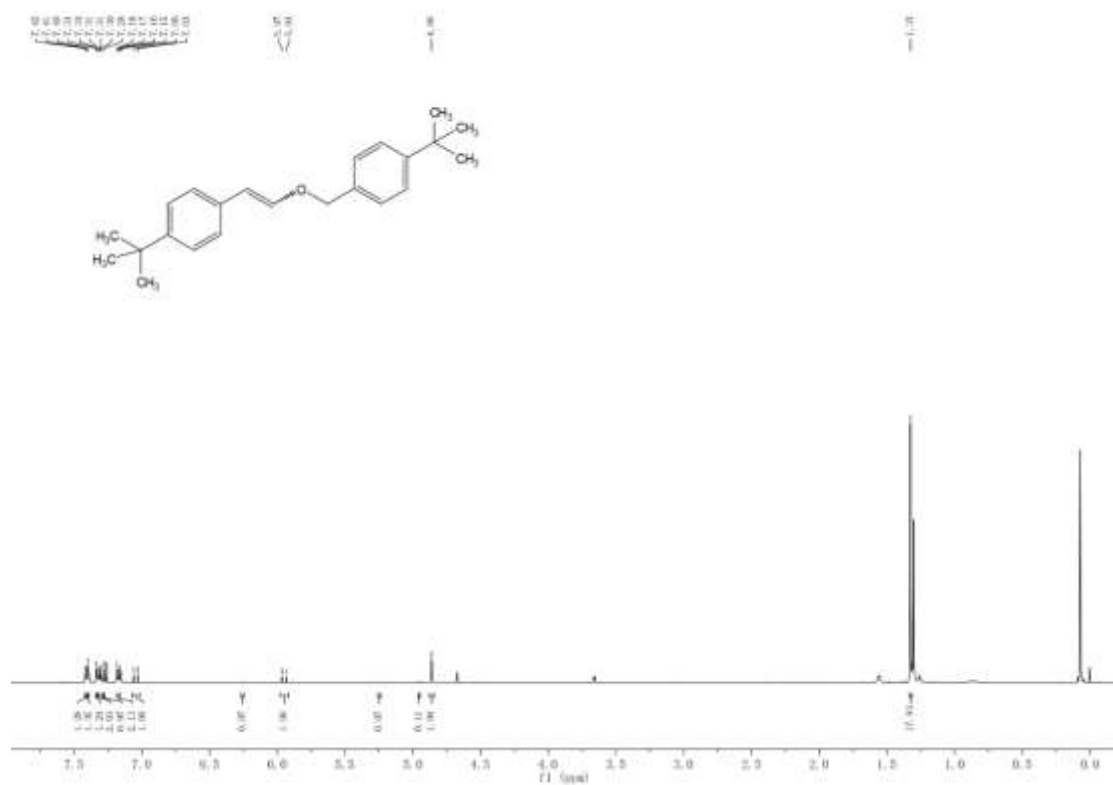

Figure S56.  $^1\text{H}$  NMR spectrum of compound **4g**



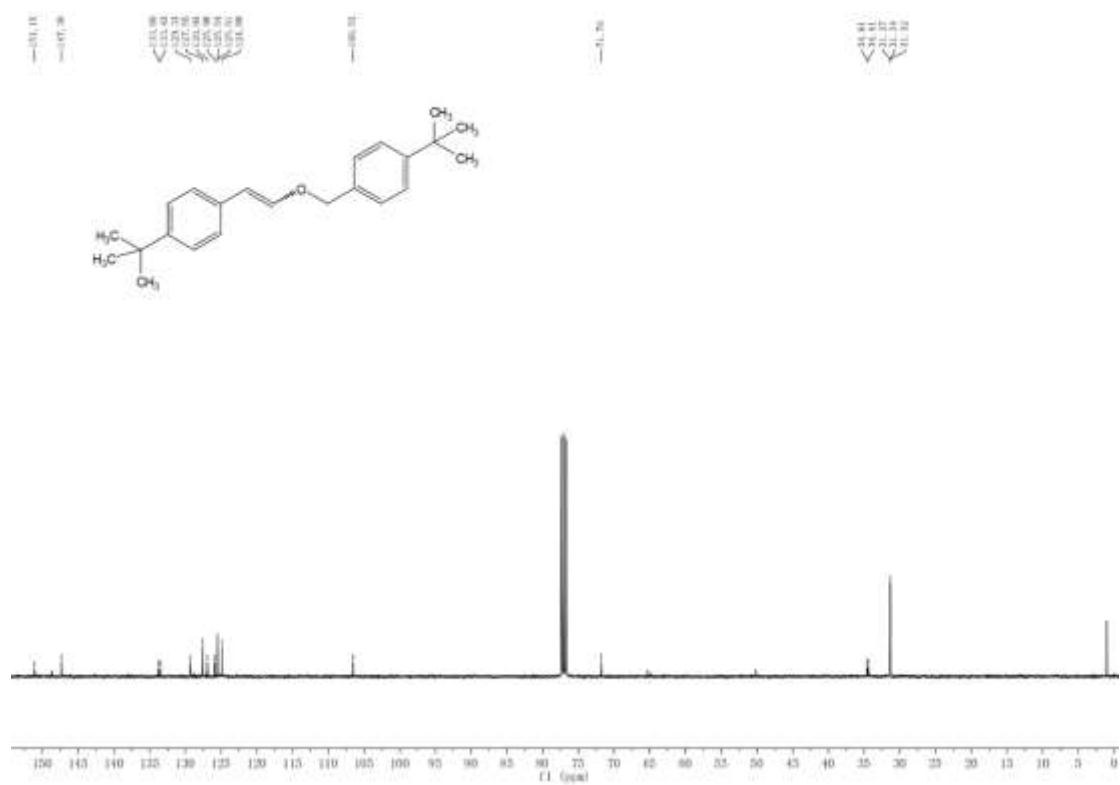

Figure S57.  $^{13}\text{C}$  NMR spectrum of compound **4g**

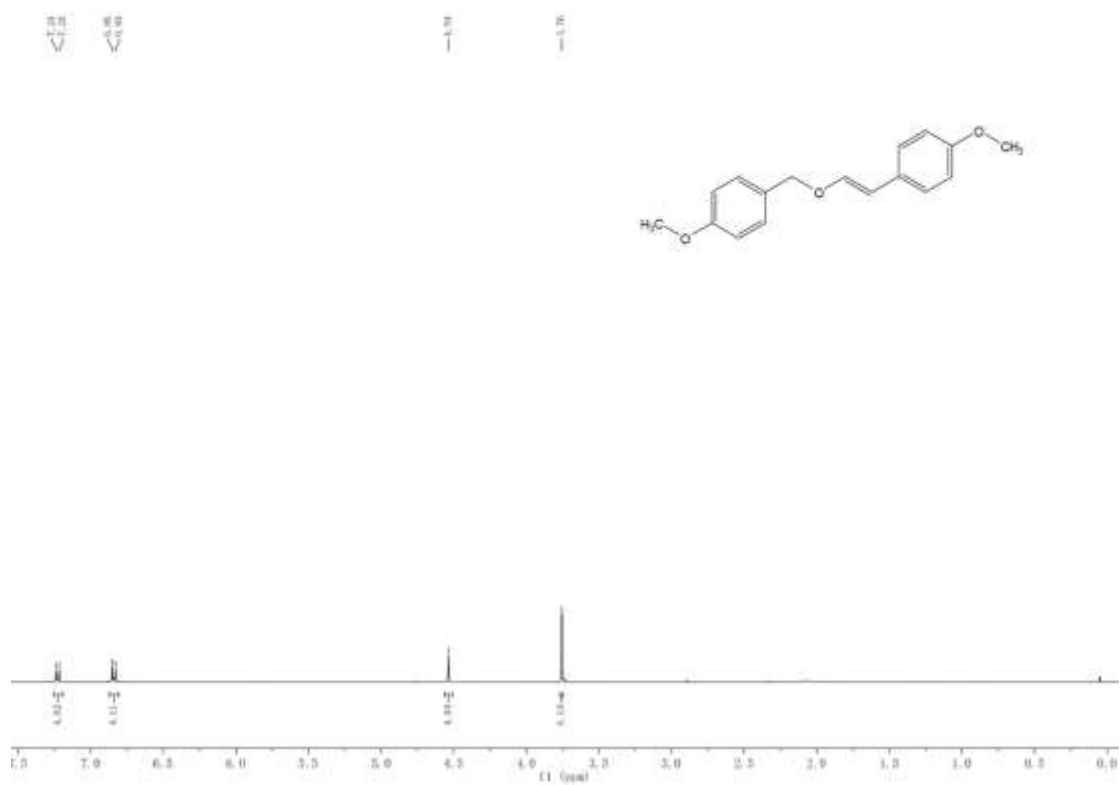

Figure S58.  $^1\text{H}$  NMR spectrum of compound **4h**





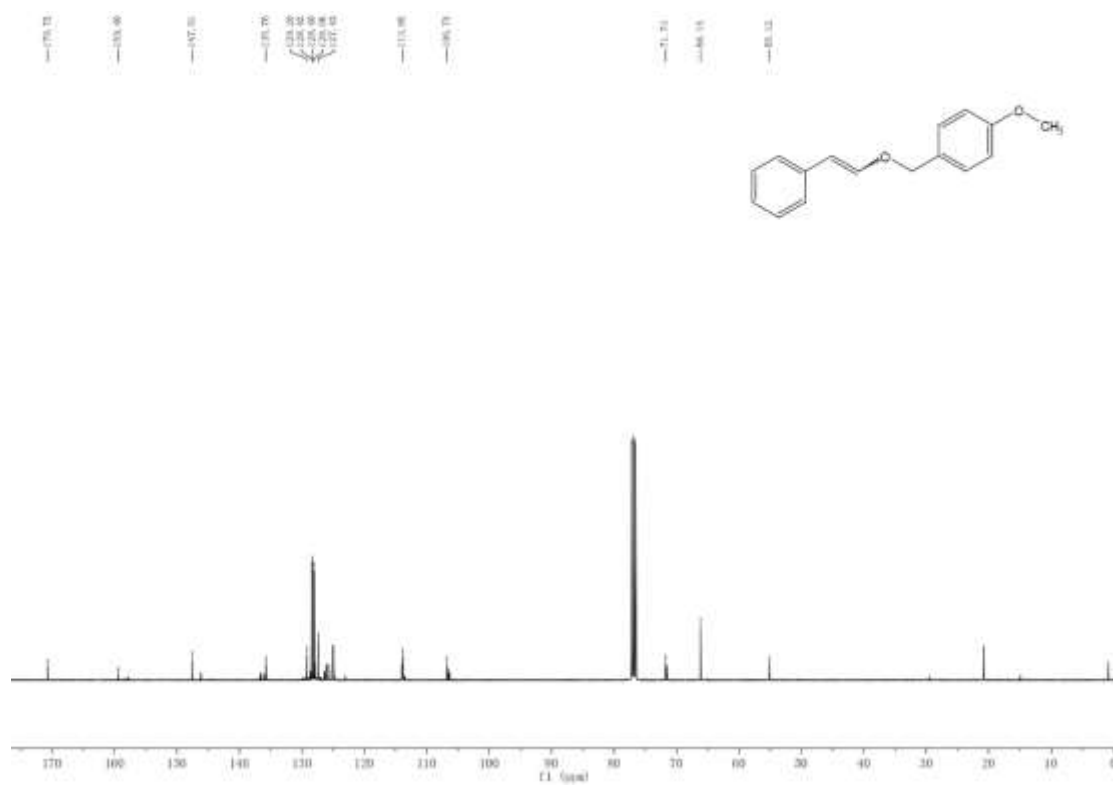

Figure S63.  $^{13}\text{C}$  NMR spectrum of compound **4j**

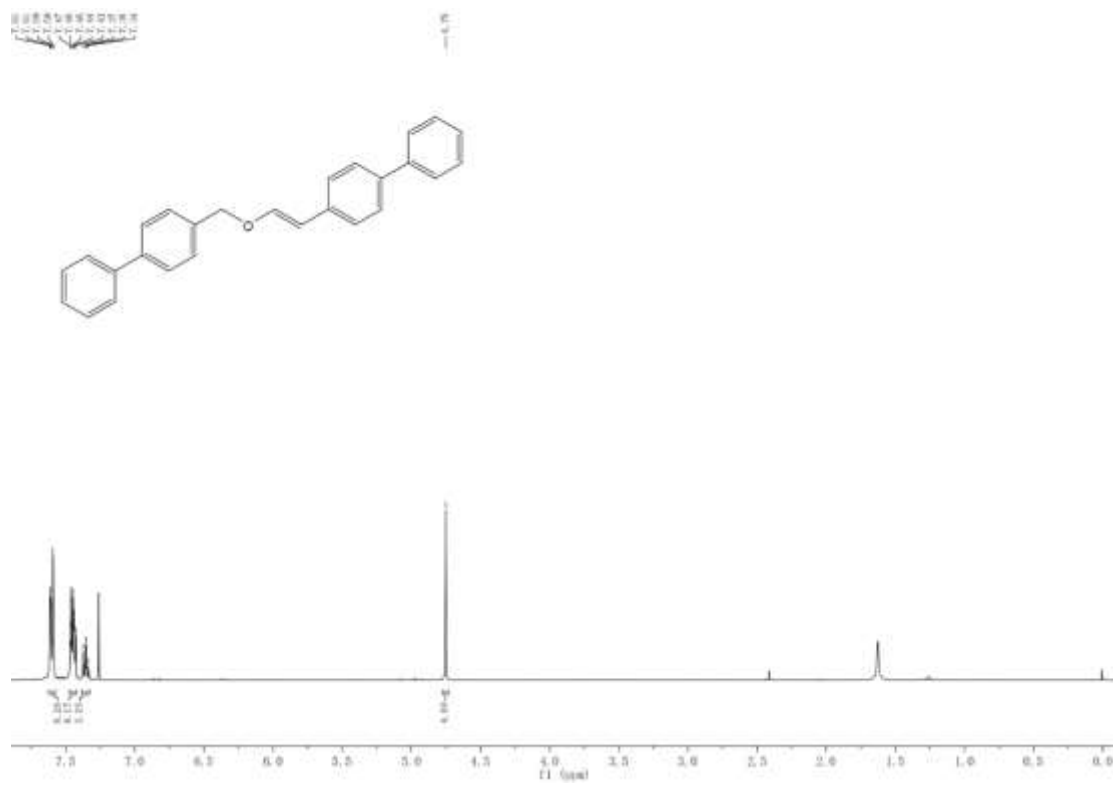

Figure S64.  $^1\text{H}$  NMR spectrum of compound **4k**

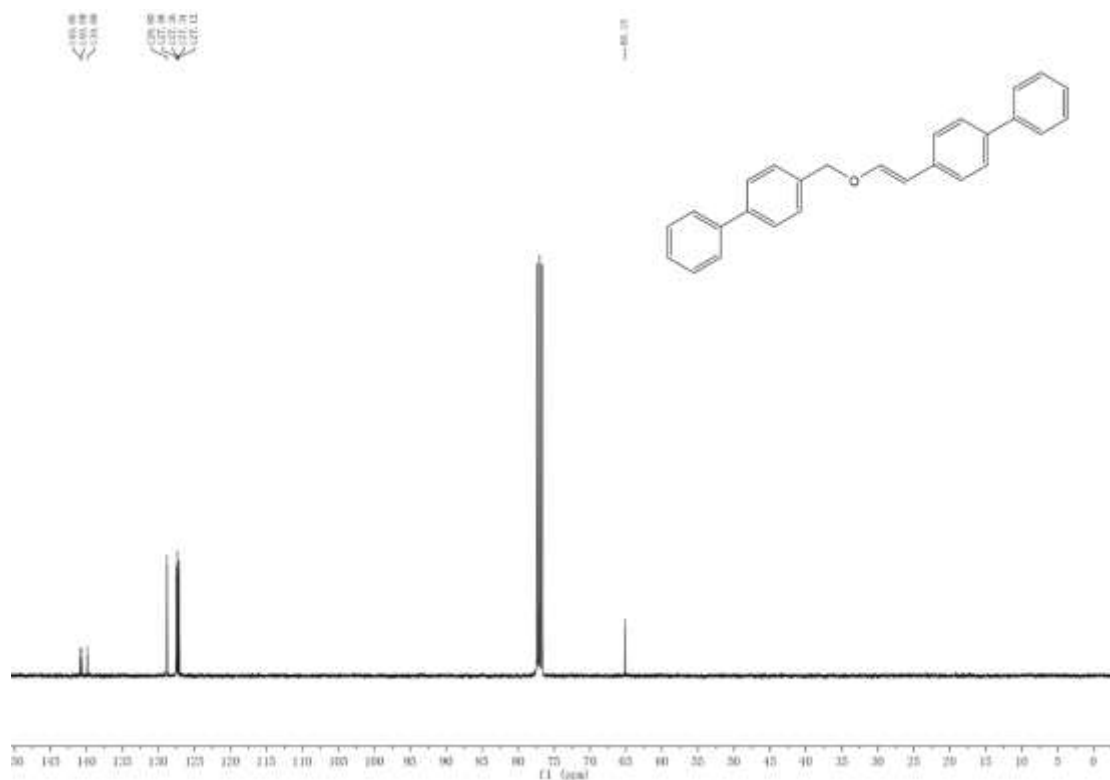

Figure S65.  $^{13}\text{C}$  NMR spectrum of compound **4k**

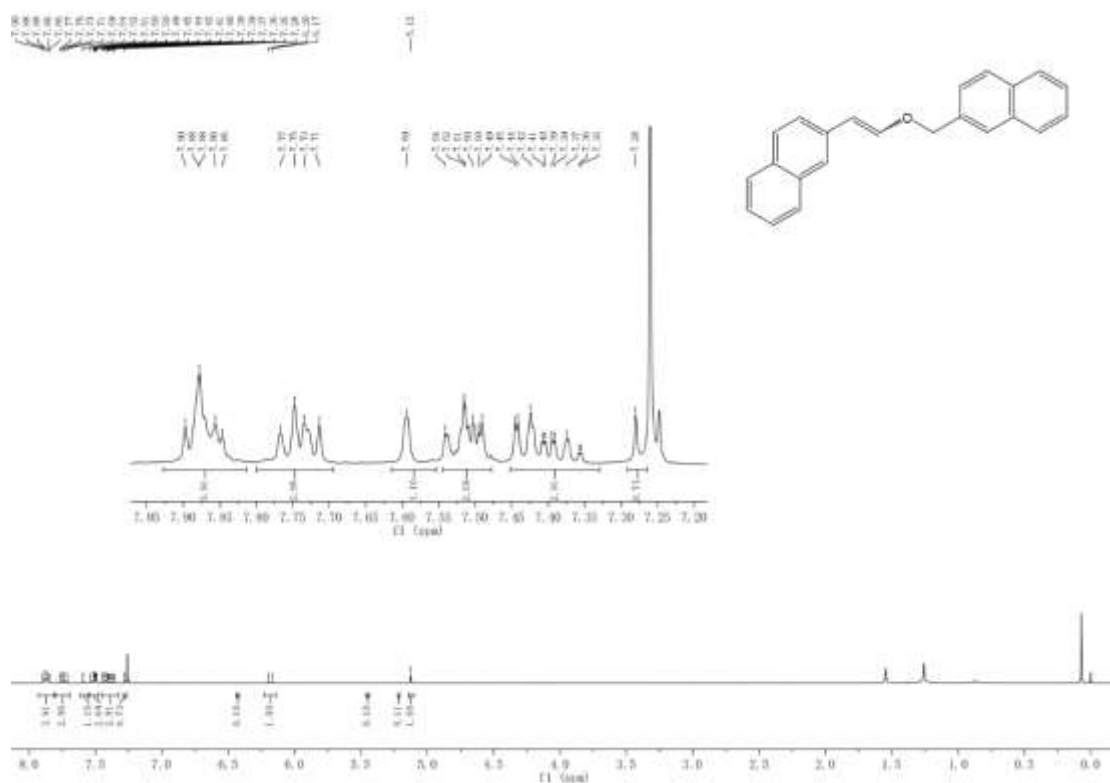

Figure S66.  $^1\text{H}$  NMR spectrum of compound **4l**

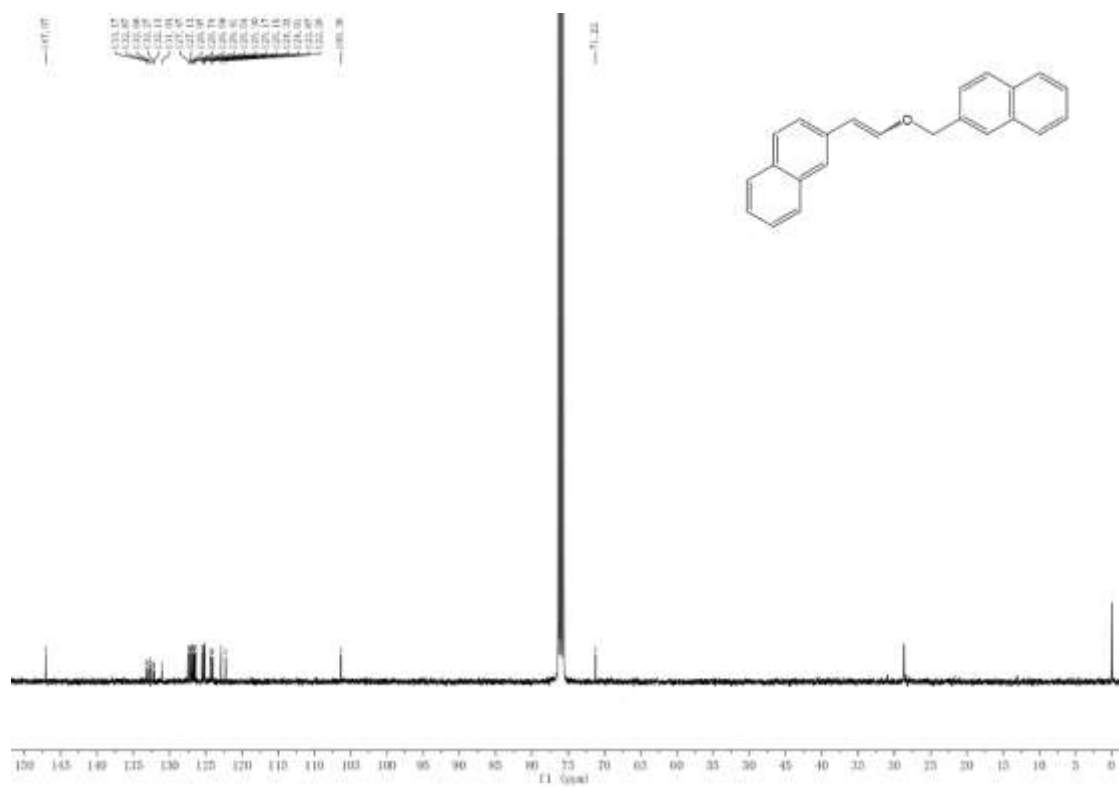

Figure S67.  $^{13}\text{C}$  NMR spectrum of compound **4l**

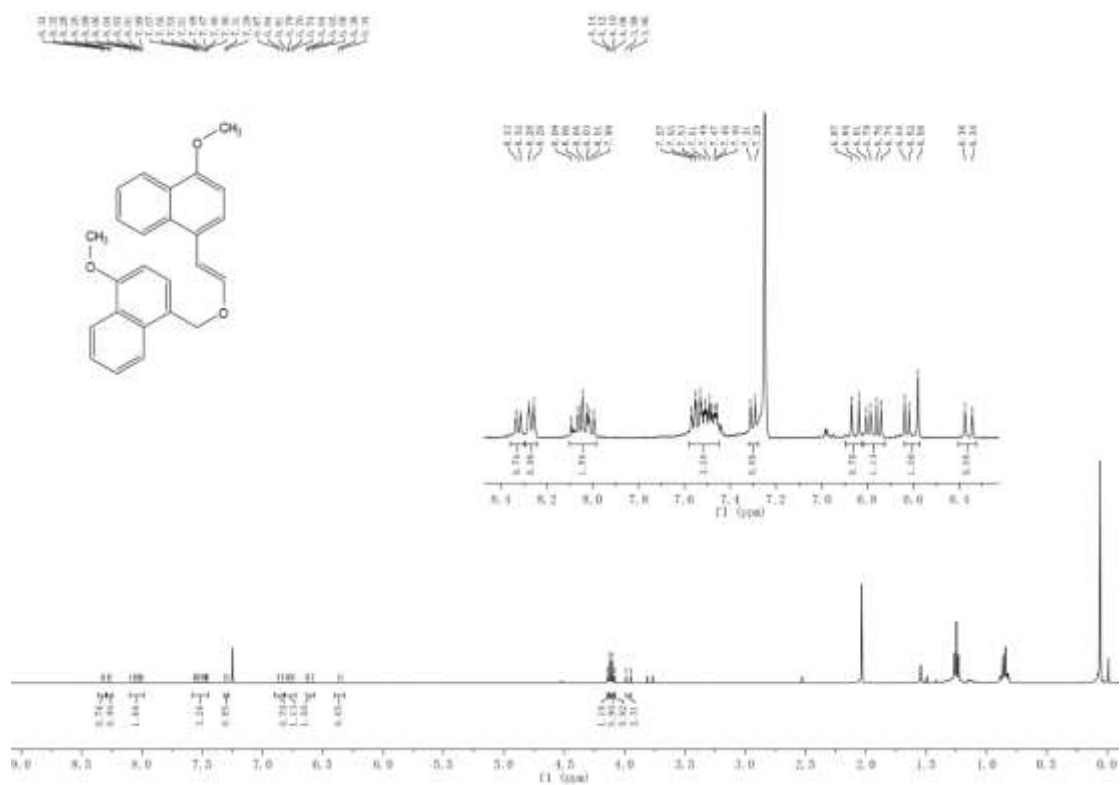

Figure S68.  $^1\text{H}$  NMR spectrum of compound **4m**

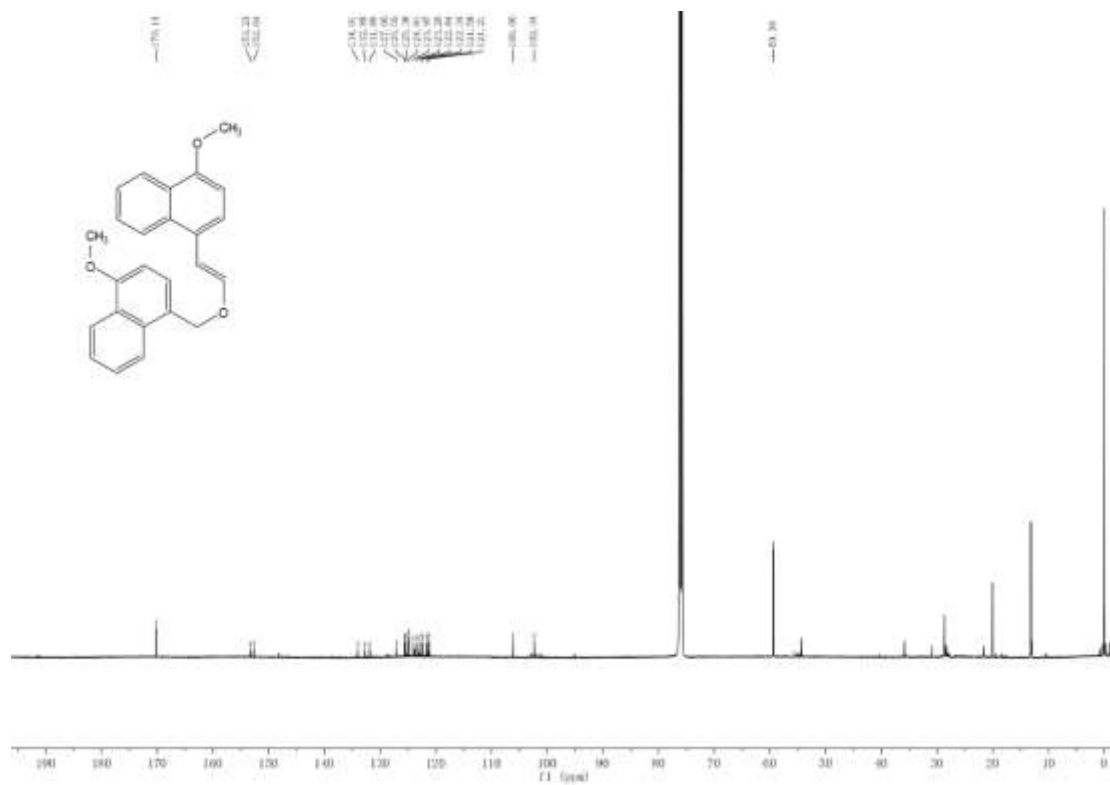

Figure S69.  $^{13}\text{C}$  NMR spectrum of compound **4m**

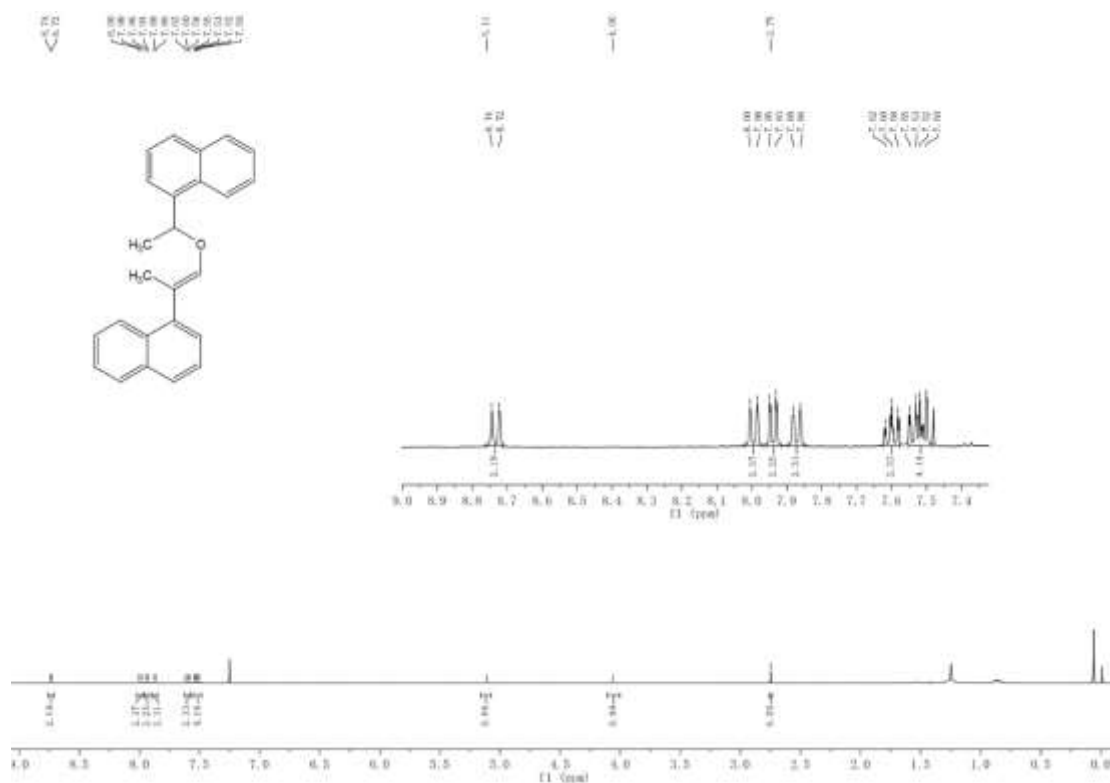

Figure S70.  $^1\text{H}$  NMR spectrum of compound **4n**

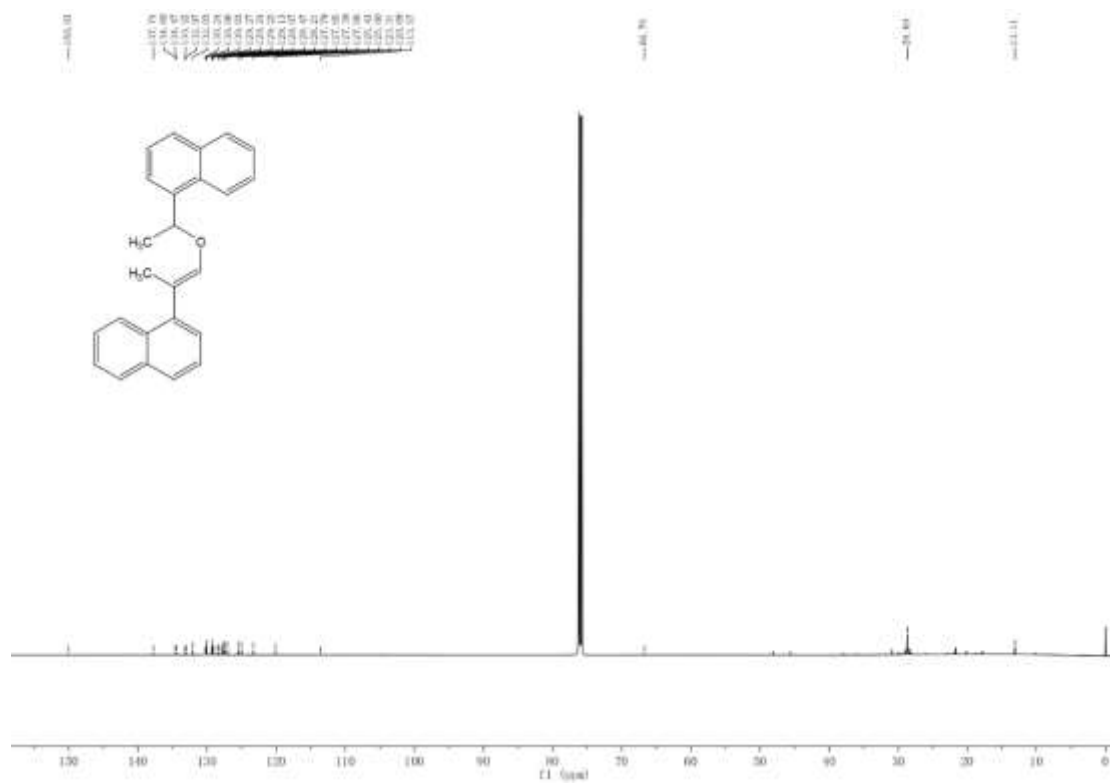

Figure S71. <sup>13</sup>C NMR spectrum of compound **4n**

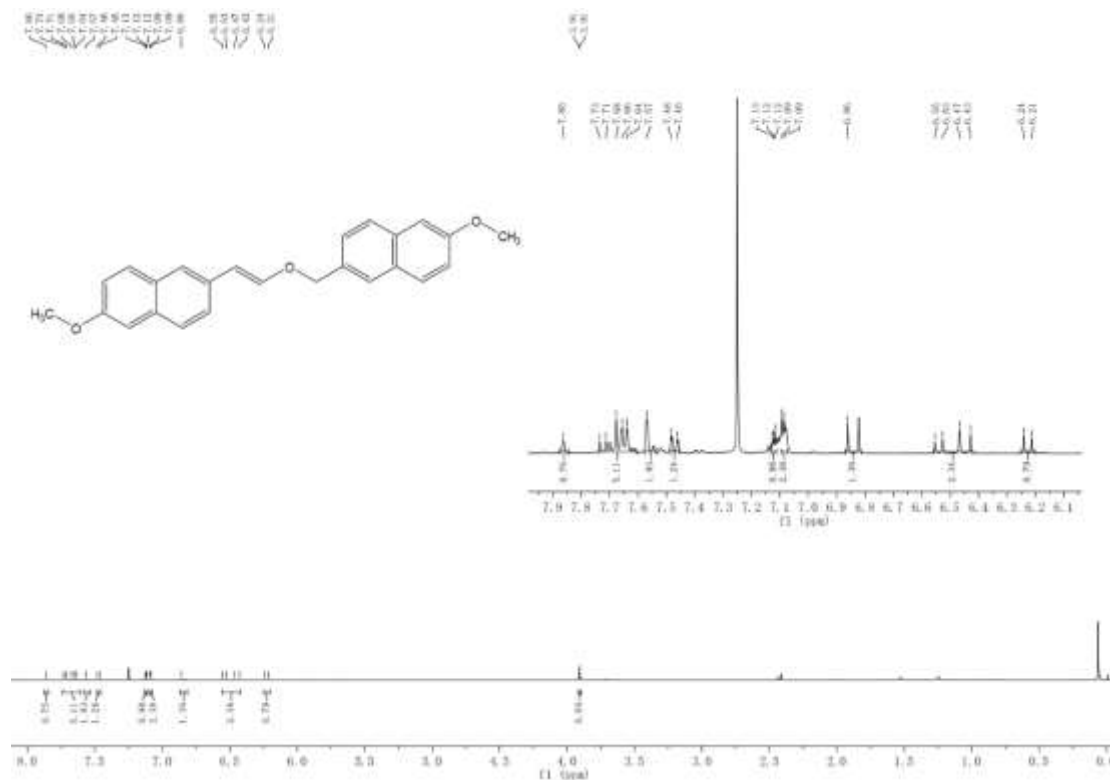

Figure S72. <sup>1</sup>H NMR spectrum of compound **4o**



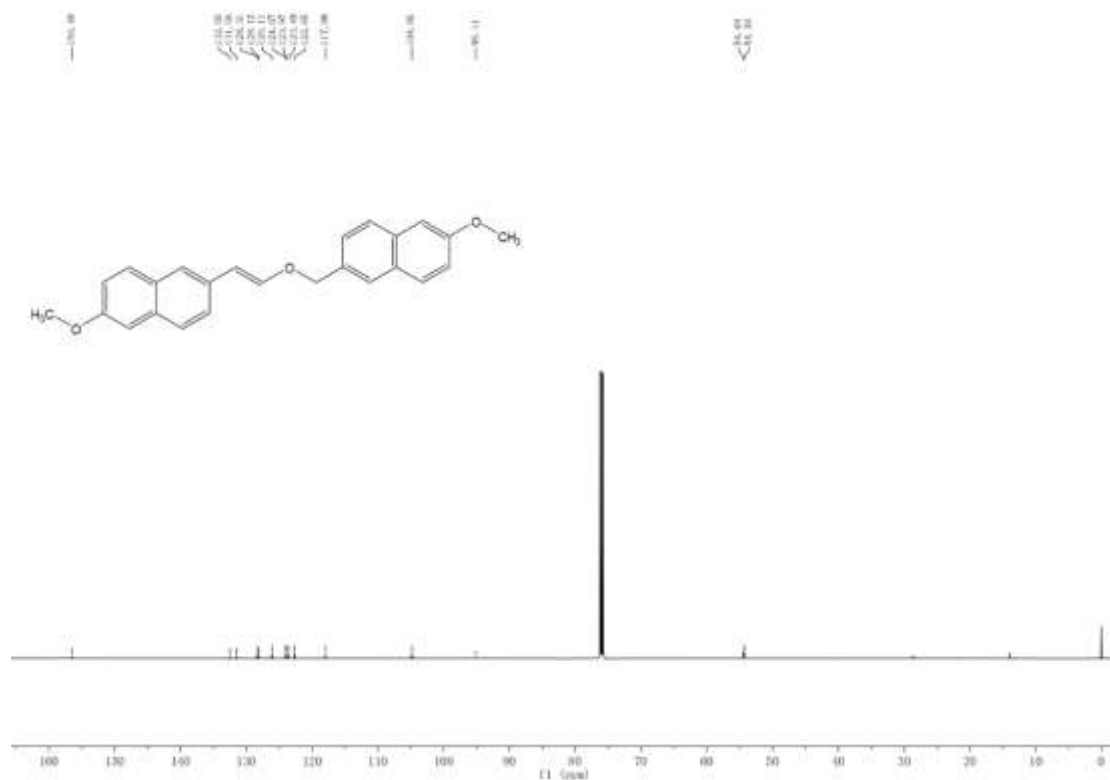

Figure S73.  $^{13}\text{C}$  NMR spectrum of compound **4o**

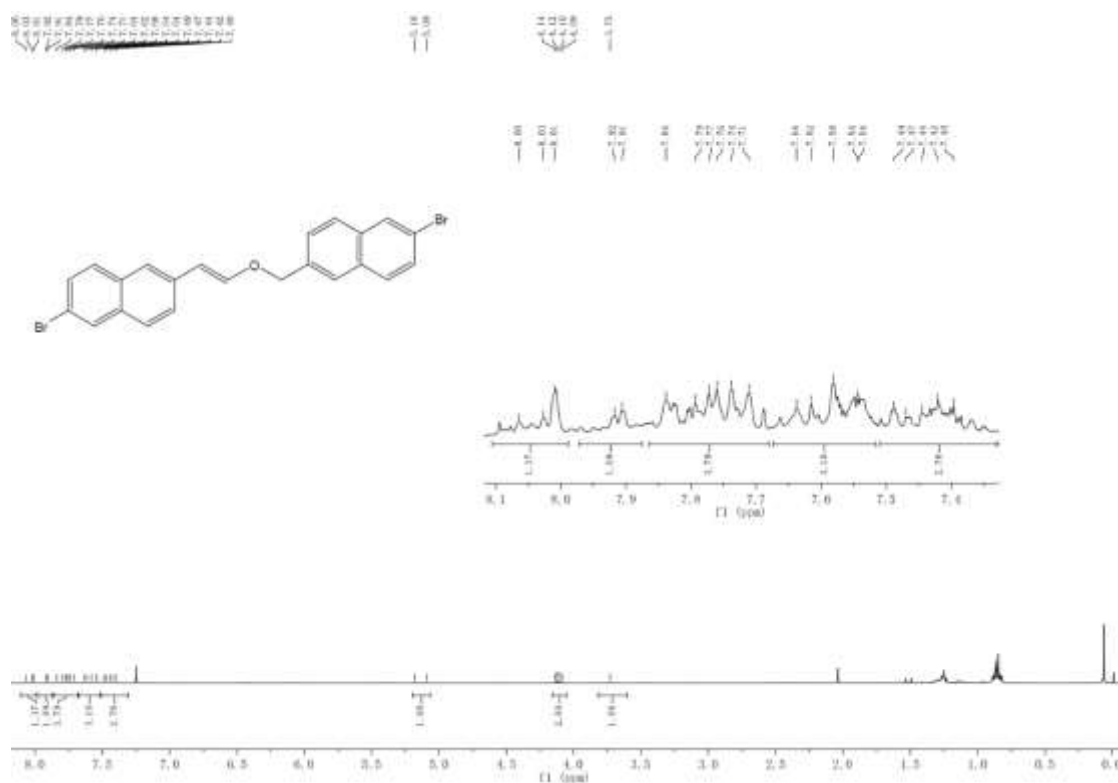

Figure S74.  $^1\text{H}$  NMR spectrum of compound **4p**

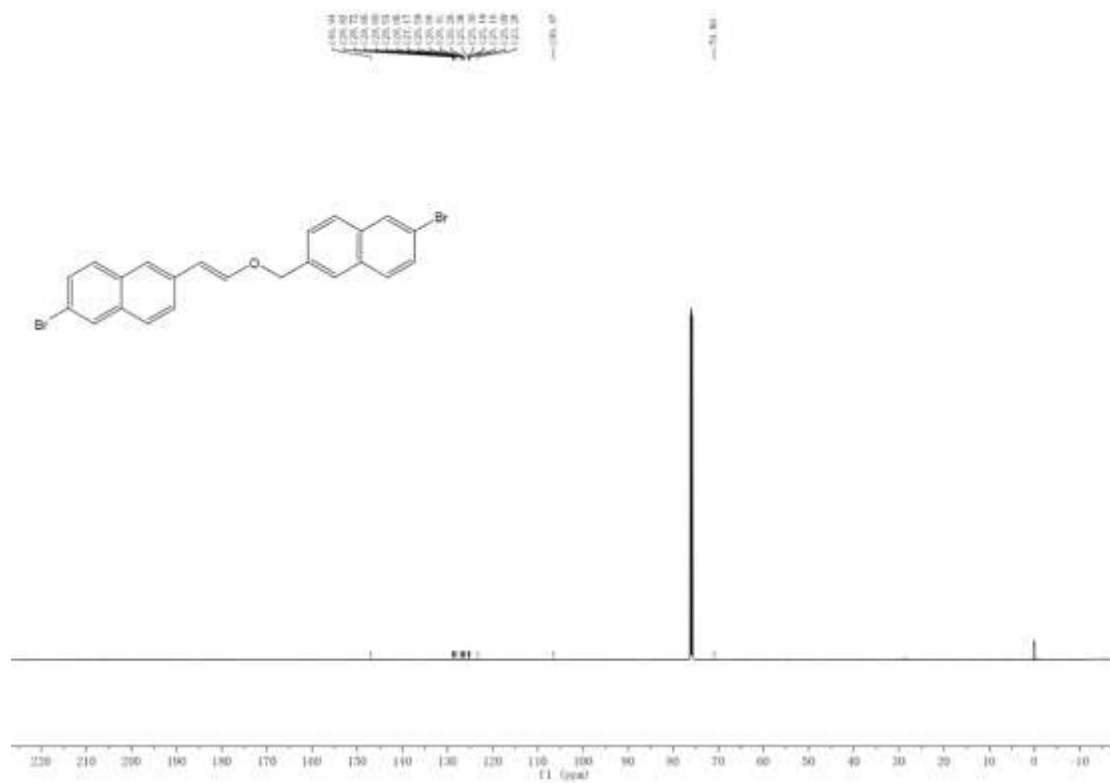

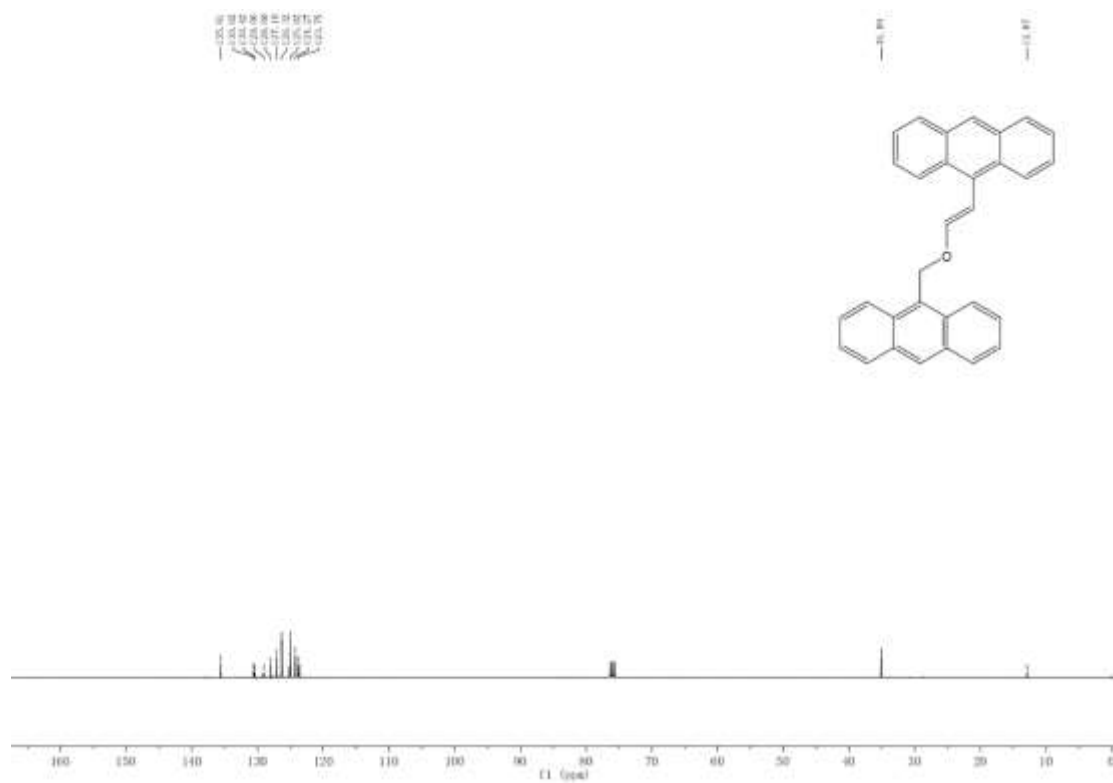

Figure S77.  $^{13}\text{C}$  NMR spectrum of compound 4q

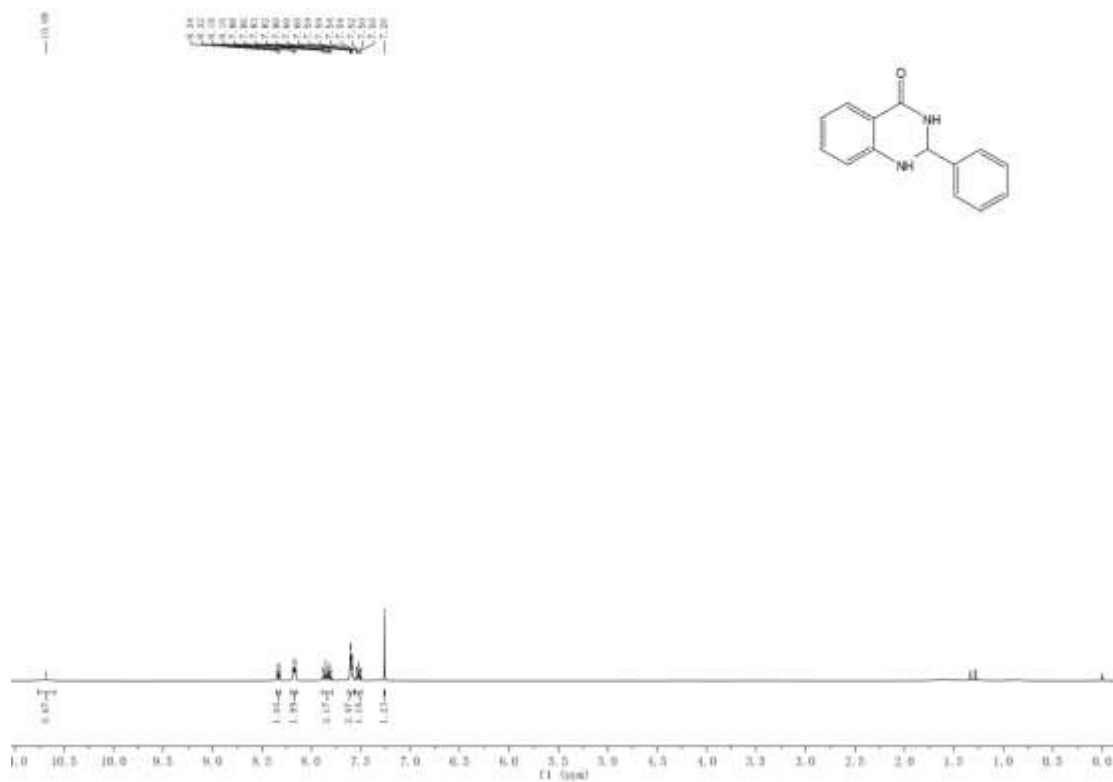

Figure S78.  $^1\text{H}$  NMR spectrum of compound IV

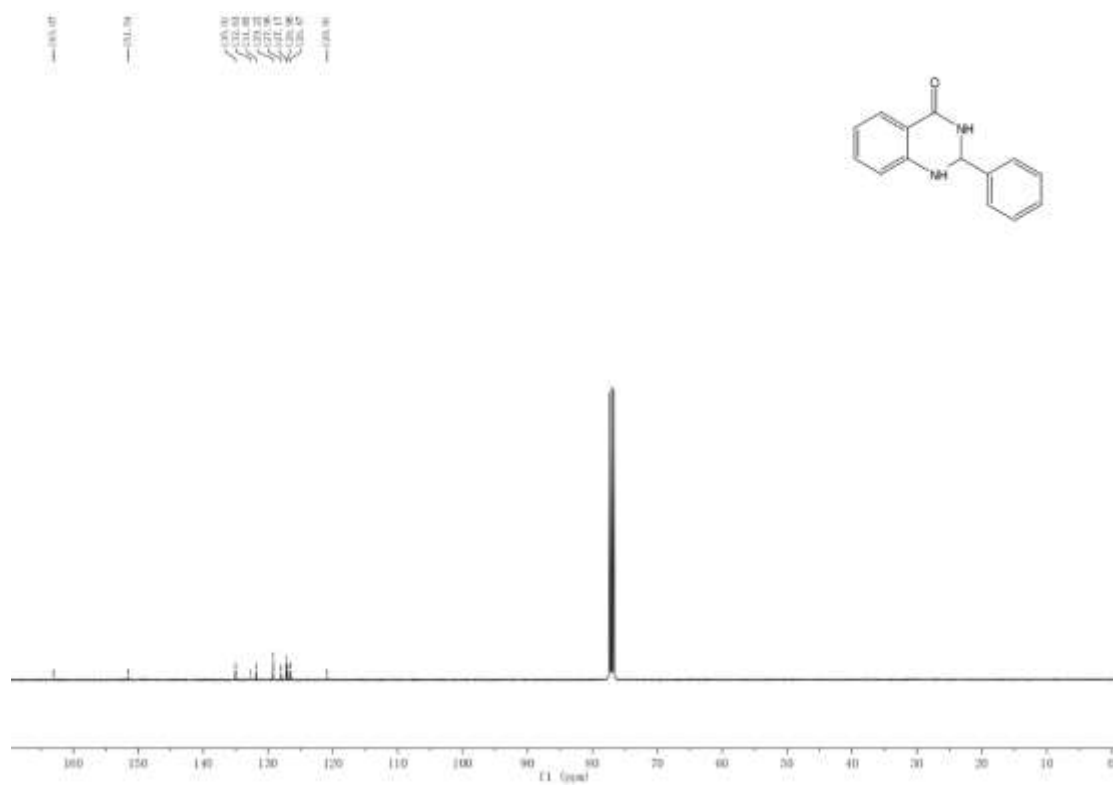

Figure S79. <sup>13</sup>C NMR spectrum of compound IV

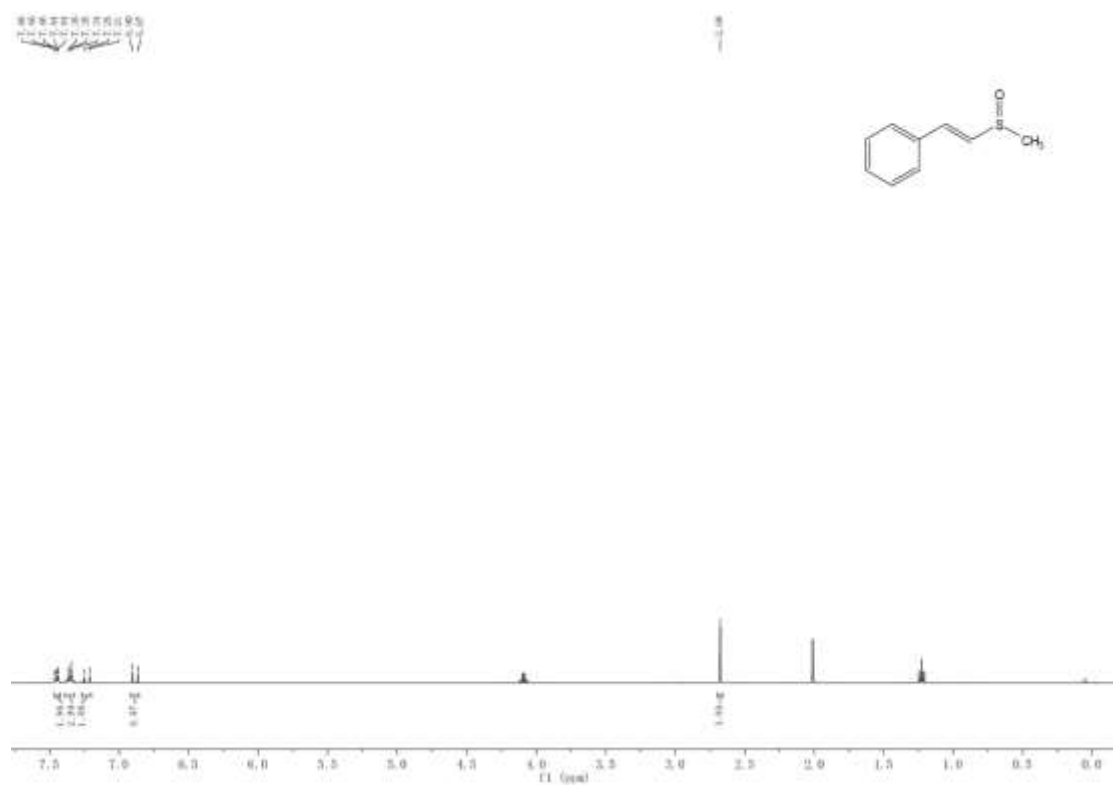

Figure S80. <sup>1</sup>H NMR spectrum of compound A

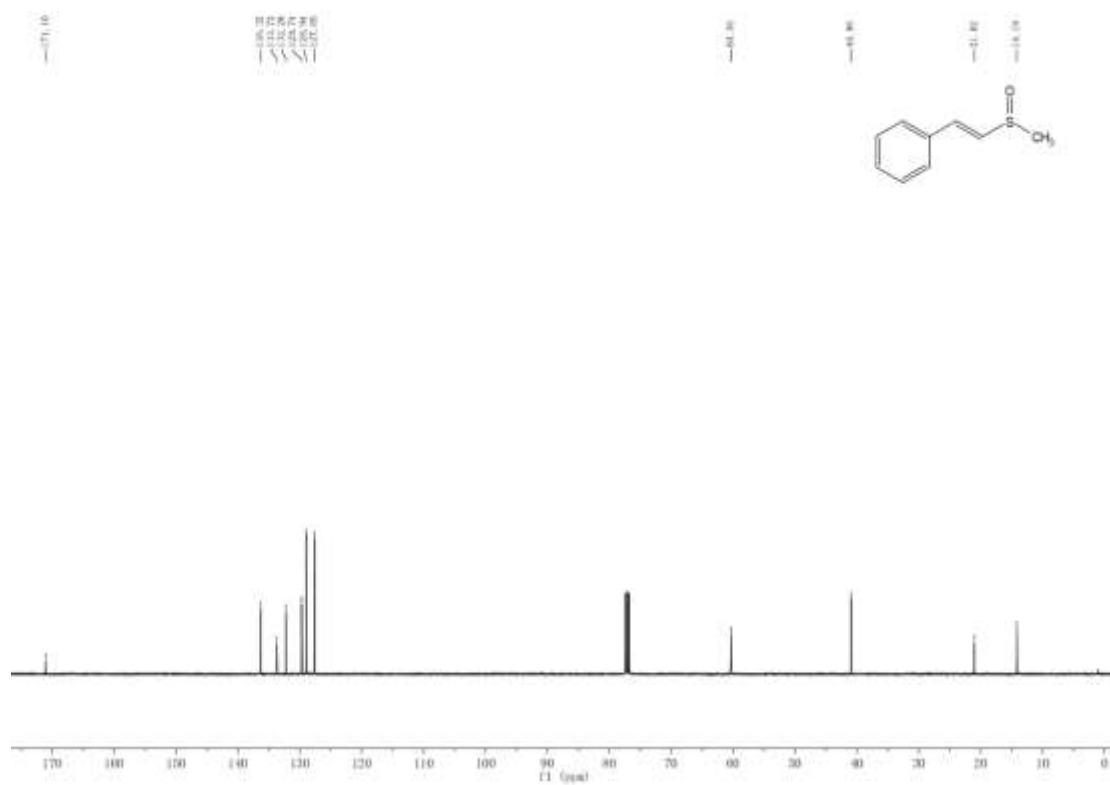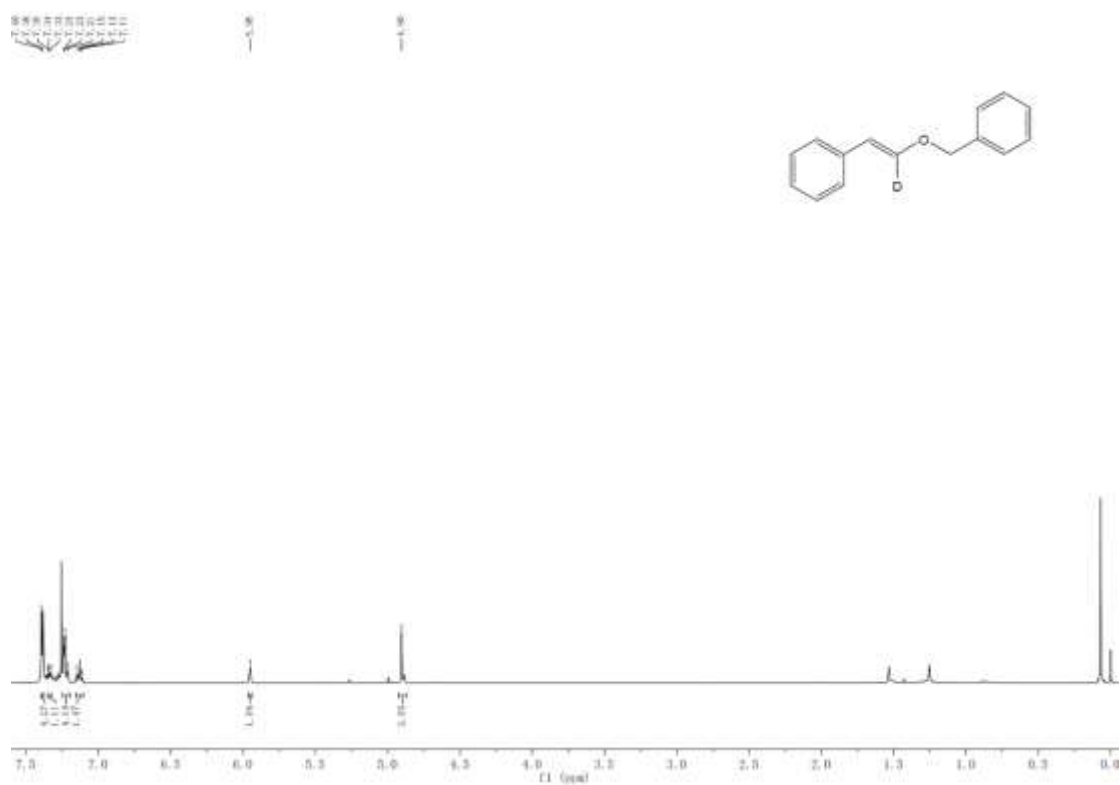

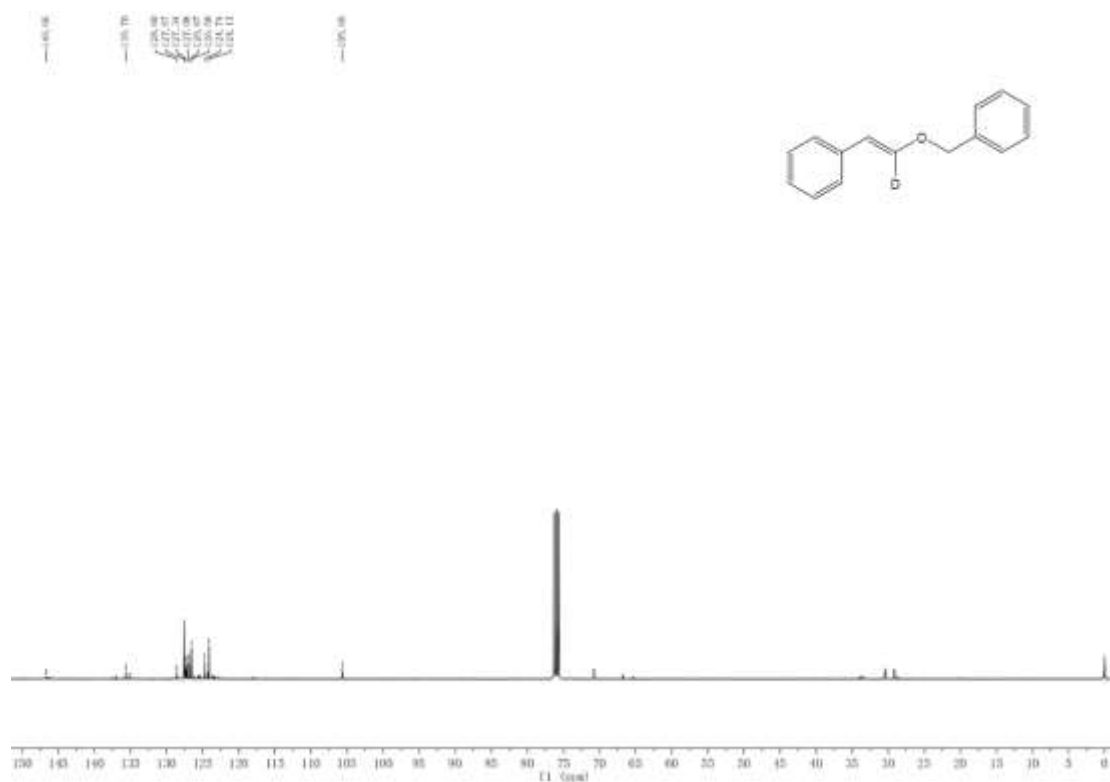

Figure S83. <sup>13</sup>C NMR spectrum of compoundd-4a

### ■ References:

- [1] X. Zhang, B. Luo, A. Banik, J. Z. Tubbesing, J. A. Switzer, *ACS Applied Materials & Interfaces* **2023**, *15*, 18440-18449.
- [2] Y. Wang, Y. Qin, W. Li, Y. Wang, L. Zhu, M. Zhao, Y. Yu, *Transactions of Tianjin University* **2023**, *29*, 275-283.
- [3] Y. Yue, A. J. Binder, R. Song, Y. Cui, J. Chen, D. K. Hensley, S. Dai, *Dalton Trans.* **2014**, *43*, 17893-17898.
- [4] M. Zhang, D. Hu, Z. Xu, B. Liu, M. Boubeche, Z. Chen, Y. Wang, H. Luo, K. Yan, *Journal of Materials Science & Technology* **2021**, *72*, 172-179.
